# Supplementary material for: Feasibility and acceptability of SARS-CoV-2 testing and surveillance in primary school children in England: Prospective, cross-sectional study
Source: PLOS journal article supplement (doi:10.1371/journal.pone.0255517), 2021-08-27
Supplement: S1 (10.1371/journal.pone.0255517.s001) [file journal.pone.0255517.s001.pdf]

# Supporting Questionnaire (S1): Feasibility questionnaire for staff and parents at recruitment (June 2020)

## FEASIBILITY QUESTIONS

We are trying to assess the practicalities of testing school staff more regularly

1. ***If you had a nose swab today, how frequently would you agree to have a nose swab in the future? (tick one)***

- |                                       |                                                                       |
|---------------------------------------|-----------------------------------------------------------------------|
| <input type="checkbox"/> Daily        | <input type="checkbox"/> At the beginning and end of each half-term   |
| <input type="checkbox"/> Twice a week | <input type="checkbox"/> At the beginning and end of each term        |
| <input type="checkbox"/> Once a week  | <input type="checkbox"/> The frequency of swabbing does not bother me |
| <input type="checkbox"/> Once a month | <input type="checkbox"/> I wouldn't agree to have any more swabs done |

2. ***If you had a throat swab today, how frequently would you agree to have a throat swab in the future? (tick one)***

- |                                       |                                                                       |
|---------------------------------------|-----------------------------------------------------------------------|
| <input type="checkbox"/> Daily        | <input type="checkbox"/> At the beginning and end of each half-term   |
| <input type="checkbox"/> Twice a week | <input type="checkbox"/> At the beginning and end of each term        |
| <input type="checkbox"/> Once a week  | <input type="checkbox"/> The frequency of swabbing does not bother me |
| <input type="checkbox"/> Once a month | <input type="checkbox"/> I wouldn't agree to have any more swabs done |

3. ***If you had a saliva swab today, how frequently would you agree to have a saliva swab in the future? (tick one)***

- |                                       |                                                                       |
|---------------------------------------|-----------------------------------------------------------------------|
| <input type="checkbox"/> Daily        | <input type="checkbox"/> At the beginning and end of each half-term   |
| <input type="checkbox"/> Twice a week | <input type="checkbox"/> At the beginning and end of each term        |
| <input type="checkbox"/> Once a week  | <input type="checkbox"/> The frequency of swabbing does not bother me |
| <input type="checkbox"/> Once a month | <input type="checkbox"/> I wouldn't agree to have any more swabs done |

4. ***If you had a blood test today, how frequently would you agree to have a blood in the future? (tick one)***

- |                                       |                                                                       |
|---------------------------------------|-----------------------------------------------------------------------|
| <input type="checkbox"/> Daily        | <input type="checkbox"/> At the beginning and end of each half-term   |
| <input type="checkbox"/> Twice a week | <input type="checkbox"/> At the beginning and end of each term        |
| <input type="checkbox"/> Once a week  | <input type="checkbox"/> The frequency of swabbing does not bother me |
| <input type="checkbox"/> Once a month | <input type="checkbox"/> I wouldn't agree to have any more swabs done |

5. ***How would you rate your overall experience today?***

- A. Very dissatisfied    B. Dissatisfied    C. Neutral    D. Satisfied    E. Very satisfied

6. ***Any further comments:***
