# Supplementary material for: Feasibility and acceptability of SARS-CoV-2 testing and surveillance in primary school children in England: Prospective, cross-sectional study
Source: PLoS One. 2021 Aug 27;16(8):e0255517. doi: 10.1371/journal.pone.0255517 (PMC8396768; doi:10.1371/journal.pone.0255517)
Supplement: S1 Data — (XLSX) [file pone.0255517.s004.xlsx]

## Sheet: kids_questionnaire
plosone_id	1_pre_nose_swab	2_pre_throat_swab	3_pre_blood_test	4_pre_OFS	1_post_nose_pain	1_post_nose_expected	1_post_nose_again	2_post_throat_pain	2_post_throat_expected	2_post_throat_again	3_post_blood_pain	3_post_blood_expected	3_post_blood_again	4_post_ofs_pain	4_post_ofs_expected	4_post_ofs_again	order_nose	order_throat	order_blood	order_ofs	4_post_ofs_again_difforder	agegroup
7.17051	A little bit nervous	I don't mind - I'm not worried	A little bit nervous	I don't mind - I'm not worried	0	Better than I thought it was going to be	Yes	0	Better than I thought it was going to be	Yes	2	Better than I thought it was going to be	Maybe	0	What I thought it would be like	Yes	3	2	4	1	FALSE	8-11
7.89802	Very nervous	Very nervous	I'm looking forward to it	I'm looking forward to it	0	Better than I thought it was going to be	Yes	0	Better than I thought it was going to be	Maybe	2	Worse than I thought	No	0	Better than I thought it was going to be	No	3	2	4	1	TRUE	4-7
3.58521	Very nervous	I don't mind - I'm not worried	Very nervous	I don't mind - I'm not worried	0	Better than I thought it was going to be	Yes	0	What I thought it would be like	Yes	4	Better than I thought it was going to be	Maybe	0	What I thought it would be like	Yes	3	1	4	2	FALSE	8-11
8.78188	Very nervous	Very nervous	Very nervous	Very nervous	2	What I thought it would be like	Maybe	4	What I thought it would be like	No	10	Worse than I thought	No	0	Better than I thought it was going to be	No	3	2	4	1	TRUE
2.99427	A little bit nervous	I don't mind - I'm not worried	Very nervous	I don't mind - I'm not worried	0	Better than I thought it was going to be	Yes	0	What I thought it would be like	No	0	What I thought it would be like	No	0	What I thought it would be like	No	3	2	4	1	TRUE	4-7
0.249639	I'm looking forward to it	I'm looking forward to it	I'm looking forward to it	I'm looking forward to it	0	Better than I thought it was going to be	No	0	Better than I thought it was going to be	Yes	8	Worse than I thought	No	0	Better than I thought it was going to be	No	3	2	4	1	TRUE	4-7
7.68023	Very nervous	Very nervous	Very nervous	Very nervous	2	What I thought it would be like	No	0	What I thought it would be like	No	6	What I thought it would be like	No	0	What I thought it would be like	Maybe	3	1	4	2	TRUE
7.46868	A little bit nervous	I'm looking forward to it	I don't mind - I'm not worried	A little bit nervous	0	Better than I thought it was going to be	Maybe	0	Better than I thought it was going to be	Yes	8	Worse than I thought	No	0	Better than I thought it was going to be	Maybe	3	1	4	2	TRUE
8.17601	I don't mind - I'm not worried	A little bit nervous	Very nervous	I don't mind - I'm not worried	2	What I thought it would be like	Maybe	2	What I thought it would be like	Maybe	8	Worse than I thought	Maybe	0	Worse than I thought	Maybe	2	1	4	3	TRUE	8-11
2.55687	I'm looking forward to it	I'm looking forward to it	Very nervous	I'm looking forward to it	0	What I thought it would be like	Yes	0	Worse than I thought	Maybe	8	Better than I thought it was going to be	No	0	What I thought it would be like	Yes	2	3	4	1	FALSE	8-11
3.56811					2	Better than I thought it was going to be	No	6	Worse than I thought	No	2	What I thought it would be like	No	0	What I thought it would be like	No	2	3	4	1	TRUE	4-7
5.59308	I'm looking forward to it	I'm looking forward to it	I'm looking forward to it	I'm looking forward to it	0	What I thought it would be like	Maybe	4	What I thought it would be like	Maybe	8	Worse than I thought	No	2	What I thought it would be like	No	2	3	4	1	TRUE
6.75648	I don't mind - I'm not worried	A little bit nervous	I don't mind - I'm not worried	I don't mind - I'm not worried	0	Better than I thought it was going to be	Maybe	0	Better than I thought it was going to be	Maybe	2	Better than I thought it was going to be	No	0	Better than I thought it was going to be	Maybe	2	3	4	1	FALSE	4-7
2.02564	I don't mind - I'm not worried	A little bit nervous	Very nervous		0	Better than I thought it was going to be	Maybe	2	Better than I thought it was going to be	Maybe	2	Worse than I thought	Maybe	0	What I thought it would be like	Yes	2	3	4	1	FALSE	4-7
1.78109	Very nervous	Very nervous	Very nervous	Very nervous	4	Worse than I thought	Yes		What I thought it would be like	Yes	4	Better than I thought it was going to be	Maybe	0	Better than I thought it was going to be	Yes	2	3	4	1	FALSE	8-11
1.77089	I don't mind - I'm not worried	A little bit nervous	I don't mind - I'm not worried	I don't mind - I'm not worried	0	Better than I thought it was going to be	No	2	Better than I thought it was going to be	No	4	Better than I thought it was going to be	Maybe	0	Better than I thought it was going to be	Yes	2	3	4	1	FALSE	8-11
5.2021	I don't mind - I'm not worried	I don't mind - I'm not worried	I'm looking forward to it	A little bit nervous	4	Better than I thought it was going to be	Maybe	4	Better than I thought it was going to be	Maybe	10	Worse than I thought	No	4	Better than I thought it was going to be	Yes	2	1	4	3	FALSE
5.46445	A little bit nervous	I don't mind - I'm not worried	Very nervous	I'm looking forward to it	0	Better than I thought it was going to be	No	0	Better than I thought it was going to be	No	10	Worse than I thought	No	2	Better than I thought it was going to be	Maybe	1	3	4	2	TRUE	4-7
4.15831	I don't mind - I'm not worried	A little bit nervous	Very nervous	I'm looking forward to it	4	Better than I thought it was going to be	No	0	Worse than I thought	No	10	What I thought it would be like	No	0	Better than I thought it was going to be	No	1	1	4	1	FALSE	8-11
9.86264	A little bit nervous	A little bit nervous	Very nervous	Very nervous	0	Worse than I thought	Maybe	0	What I thought it would be like	Yes	2	Better than I thought it was going to be	No	2	Better than I thought it was going to be	Maybe	1	2	4	3	FALSE	4-7
6.12853	I don't mind - I'm not worried	A little bit nervous	A little bit nervous	I don't mind - I'm not worried	0	Better than I thought it was going to be	Yes	0	Better than I thought it was going to be	Yes	4	Better than I thought it was going to be	Maybe	0	Worse than I thought		1	2	4	3	TRUE	8-11
2.29138	I don't mind - I'm not worried	A little bit nervous	A little bit nervous	I don't mind - I'm not worried	0	Better than I thought it was going to be	Yes	2	Better than I thought it was going to be	Yes	4	Better than I thought it was going to be	Maybe	0	Worse than I thought	Maybe	1	3	4	2	TRUE
4.55628	I don't mind - I'm not worried	I don't mind - I'm not worried	A little bit nervous	I don't mind - I'm not worried	0	Better than I thought it was going to be	Maybe	0	Better than I thought it was going to be	Maybe	2	Better than I thought it was going to be	No	0	Better than I thought it was going to be	Maybe	1	2	4	3	TRUE	8-11
4.40352	A little bit nervous	I don't mind - I'm not worried	A little bit nervous	I don't mind - I'm not worried	0	Better than I thought it was going to be	Maybe	2	What I thought it would be like	Maybe	4	Worse than I thought	No	2	What I thought it would be like	No	1	4	4	4	FALSE	8-11
1.25497	A little bit nervous	A little bit nervous	A little bit nervous	I don't mind - I'm not worried	0	What I thought it would be like	No	0	Better than I thought it was going to be	No	4	Better than I thought it was going to be	No	0		No	1	3	4	2	TRUE	4-7
6.23929	A little bit nervous	I don't mind - I'm not worried	A little bit nervous	I don't mind - I'm not worried	0	What I thought it would be like	Yes	6	What I thought it would be like	No	4	Better than I thought it was going to be	No	0	What I thought it would be like	No	1	3	4	2	TRUE	4-7
8.72891	I don't mind - I'm not worried	I don't mind - I'm not worried	I'm looking forward to it	I'm looking forward to it	0	What I thought it would be like	Yes	0	What I thought it would be like	Yes	0	Better than I thought it was going to be	Yes	0	What I thought it would be like	Yes	1	2	4	3	FALSE	8-11
5.72147	I'm looking forward to it	I'm looking forward to it	I don't mind - I'm not worried	I'm looking forward to it	2	Better than I thought it was going to be	No	2	Better than I thought it was going to be	No	4	Better than I thought it was going to be	No	0	Better than I thought it was going to be	No	1	3	4	2	TRUE	4-7
9.37727	A little bit nervous	Very nervous	Very nervous	I don't mind - I'm not worried	0	Better than I thought it was going to be	Yes	4	Worse than I thought	No	0	Better than I thought it was going to be	No	4	Worse than I thought	No	1	4	4	1	FALSE	8-11
5.3981	Very nervous	A little bit nervous	Very nervous	I don't mind - I'm not worried	0	What I thought it would be like	No	0	Better than I thought it was going to be	Yes	10	Worse than I thought	No	0	Better than I thought it was going to be	Yes	1	1	4	1	FALSE	8-11
4.17615	Very nervous	A little bit nervous	Very nervous	Very nervous	0	Better than I thought it was going to be	Maybe	4	What I thought it would be like	Maybe	6	What I thought it would be like	Maybe	2	What I thought it would be like	Maybe	1	3	4	2	FALSE	8-11
8.75383		A little bit nervous		I don't mind - I'm not worried	0	Better than I thought it was going to be	Maybe	2	What I thought it would be like	Maybe	8	Worse than I thought	No	0	Better than I thought it was going to be	Maybe	1	3	4	2	TRUE	8-11
5.1131	A little bit nervous	A little bit nervous	A little bit nervous	A little bit nervous	2	What I thought it would be like	Yes	0	Worse than I thought	Yes	4	Worse than I thought	No	0	Better than I thought it was going to be	Maybe	1	3	4	2	TRUE
9.91514	I'm looking forward to it	I don't mind - I'm not worried	A little bit nervous	I'm looking forward to it	0	Better than I thought it was going to be	Yes	2	What I thought it would be like	Maybe	2	What I thought it would be like	No	0	Better than I thought it was going to be	Maybe	1	3	4	2	FALSE	8-11
9.48917	A little bit nervous	A little bit nervous	A little bit nervous	A little bit nervous	0	What I thought it would be like	No	0	What I thought it would be like	No	6	Worse than I thought	No	4	What I thought it would be like	No			4		TRUE	4-7
7.27381	I don't mind - I'm not worried	I'm looking forward to it	I don't mind - I'm not worried	I don't mind - I'm not worried	0	What I thought it would be like	Maybe	2	What I thought it would be like	Maybe	2	What I thought it would be like	No	0	Better than I thought it was going to be	No	4	2	3	1	TRUE
5.97371	Very nervous	Very nervous	Very nervous	A little bit nervous	2	Better than I thought it was going to be	Maybe	2	Better than I thought it was going to be	No	4	Better than I thought it was going to be	No	0	Better than I thought it was going to be	Maybe	4	2	3	1	FALSE	8-11
4.4784	A little bit nervous	Very nervous	I don't mind - I'm not worried	I'm looking forward to it	0	What I thought it would be like	Yes	2	Worse than I thought	Maybe	2	Worse than I thought	No	0	What I thought it would be like	Yes	2	4	3	1	FALSE	4-7
7.82896	I don't mind - I'm not worried	A little bit nervous	I'm looking forward to it	I don't mind - I'm not worried	2	What I thought it would be like		4	What I thought it would be like		2	Better than I thought it was going to be		4	What I thought it would be like		2	3	3	4	FALSE	8-11
8.80024	I'm looking forward to it	I don't mind - I'm not worried	I don't mind - I'm not worried	I'm looking forward to it	0	What I thought it would be like	Maybe	4	What I thought it would be like	Maybe	2	What I thought it would be like	Maybe	0	Better than I thought it was going to be	Maybe	2	4	3	1	FALSE	8-11
5.70919	Very nervous	I don't mind - I'm not worried	Very nervous	I don't mind - I'm not worried	0	Better than I thought it was going to be	No	0	Better than I thought it was going to be	Yes							0	0	3	0	FALSE	8-11
7.50196	A little bit nervous	I don't mind - I'm not worried	Very nervous	I don't mind - I'm not worried	2	What I thought it would be like	No	2	Worse than I thought	No	0	Better than I thought it was going to be	Yes	0	Better than I thought it was going to be	Yes	4	3	2	1	FALSE	8-11
9.04282	A little bit nervous	I don't mind - I'm not worried	Very nervous	I don't mind - I'm not worried	2	What I thought it would be like	No	2	Better than I thought it was going to be	No	0	Better than I thought it was going to be	No	0	Better than I thought it was going to be	Maybe	4	3	2	1	FALSE	8-11
5.58168	I'm looking forward to it	I'm looking forward to it	I'm looking forward to it	I'm looking forward to it	0	Better than I thought it was going to be	No	0	What I thought it would be like	No	4	Better than I thought it was going to be	No	0	What I thought it would be like	Yes	4	1	2	3	TRUE
8.56851	I'm looking forward to it	I'm looking forward to it	I'm looking forward to it	I'm looking forward to it	2	Better than I thought it was going to be	Maybe	0	Better than I thought it was going to be	Yes	4	What I thought it would be like	No	0	What I thought it would be like	Yes	3	1	2	4	FALSE	8-11
1.29882	I'm looking forward to it	Very nervous	I don't mind - I'm not worried	Very nervous				6	What I thought it would be like	No	0	What I thought it would be like	Yes	0	What I thought it would be like	Maybe	3	4	2	1	FALSE	8-11
4.27043	I don't mind - I'm not worried	A little bit nervous	Very nervous	I don't mind - I'm not worried	0	Better than I thought it was going to be	Yes	0	What I thought it would be like	Yes	0	Better than I thought it was going to be	Yes	0	What I thought it would be like	Yes	3	4	2	1	FALSE	8-11
2.91172	I'm looking forward to it	I don't mind - I'm not worried	I'm looking forward to it	Very nervous	6	Better than I thought it was going to be	No	6	What I thought it would be like	No	4	Better than I thought it was going to be	No	10	Better than I thought it was going to be	No	3	4	2	1	FALSE	4-7
1.84752	I'm looking forward to it	I don't mind - I'm not worried	A little bit nervous	I don't mind - I'm not worried	2	What I thought it would be like	Yes	0	What I thought it would be like	No	2	Better than I thought it was going to be	Maybe	0	What I thought it would be like	Maybe	3	4	2	1	FALSE	8-11
8.92464	I don't mind - I'm not worried	I don't mind - I'm not worried	A little bit nervous	I don't mind - I'm not worried	0	Better than I thought it was going to be	Yes	2	Better than I thought it was going to be	Yes	2	Better than I thought it was going to be	Maybe	0	Better than I thought it was going to be	Maybe	4	2	1	3	TRUE	4-7
7.80535	I don't mind - I'm not worried	I don't mind - I'm not worried	A little bit nervous	I don't mind - I'm not worried	2	What I thought it would be like	Maybe	0	What I thought it would be like	Maybe	0	What I thought it would be like	Maybe	0	Worse than I thought	Maybe	3	2	1	4	FALSE	8-11
4.19884	Very nervous	Very nervous	A little bit nervous	I don't mind - I'm not worried	0	Better than I thought it was going to be	Yes	0	Better than I thought it was going to be	Yes	0	Better than I thought it was going to be	Yes	0	Better than I thought it was going to be	Yes	3	2	1	4	TRUE	4-7
5.79973	Very nervous	Very nervous	Very nervous	I'm looking forward to it	0	Better than I thought it was going to be	Yes	0	What I thought it would be like	No	0	Better than I thought it was going to be	Yes	0	Better than I thought it was going to be	Yes	3	4	1	2	FALSE	4-7
4.05386	I'm looking forward to it	I'm looking forward to it	I'm looking forward to it	I don't mind - I'm not worried	0	What I thought it would be like	Yes	4	Better than I thought it was going to be	Yes	2	Better than I thought it was going to be	Yes	0	Better than I thought it was going to be	Yes	3	4	1	2	FALSE	8-11
1.19736	A little bit nervous	Very nervous	A little bit nervous	I'm looking forward to it	0	Better than I thought it was going to be	No	0	Better than I thought it was going to be	No	0	Better than I thought it was going to be	No	0	Better than I thought it was going to be	No	3	4	1	2	TRUE	4-7
3.52785	Very nervous	A little bit nervous	Very nervous	I'm looking forward to it	2	Better than I thought it was going to be	Yes	0	Better than I thought it was going to be	Yes	0	Better than I thought it was going to be	Yes	0	Better than I thought it was going to be	Yes	3	4	1	2	TRUE	4-7
8.87467	I'm looking forward to it	I don't mind - I'm not worried	A little bit nervous	I don't mind - I'm not worried	0	What I thought it would be like	Yes	0	What I thought it would be like	Yes	2	Better than I thought it was going to be	Yes	0	Better than I thought it was going to be	Yes	3	2	1	4	TRUE	4-7
3.02111	I don't mind - I'm not worried	I don't mind - I'm not worried	Very nervous	I'm looking forward to it	0	Better than I thought it was going to be	Yes	0	Better than I thought it was going to be	Yes	2	Better than I thought it was going to be	Yes	0	Better than I thought it was going to be	No	3	4	1	2	TRUE
4.59525	I don't mind - I'm not worried	I don't mind - I'm not worried	I don't mind - I'm not worried	I don't mind - I'm not worried	0	What I thought it would be like	Maybe	2	Worse than I thought	No	0	Better than I thought it was going to be	Yes	0	Worse than I thought	Maybe	2	4	1	3	TRUE	8-11
6.00179	A little bit nervous	I don't mind - I'm not worried	Very nervous	I don't mind - I'm not worried	0	Better than I thought it was going to be	Maybe	0	What I thought it would be like	Maybe	0	Better than I thought it was going to be	Yes	0	Worse than I thought		2	3	1	4	TRUE	4-7
5.20479	I don't mind - I'm not worried	A little bit nervous	I don't mind - I'm not worried	I don't mind - I'm not worried	0	What I thought it would be like	Yes	0	What I thought it would be like	Maybe		Better than I thought it was going to be	Yes	0	Worse than I thought	Yes	2	4	1	3	TRUE	8-11
0.671545	A little bit nervous	Very nervous	Very nervous	A little bit nervous	2	Better than I thought it was going to be	Yes	2	Better than I thought it was going to be	Yes	2	Better than I thought it was going to be	Yes	0	Better than I thought it was going to be	Yes	2	4	1	3	TRUE	8-11
0.13705	I don't mind - I'm not worried	I'm looking forward to it	I'm looking forward to it	I don't mind - I'm not worried	0	Better than I thought it was going to be	Yes	0	Better than I thought it was going to be	Yes	0	Better than I thought it was going to be	Yes	0	What I thought it would be like	Maybe	2	3	1	4	FALSE	8-11
9.35391	I'm looking forward to it	I'm looking forward to it	Very nervous	Very nervous	0	Better than I thought it was going to be	Yes	0	Better than I thought it was going to be	Yes	0	Better than I thought it was going to be	Yes	0	Better than I thought it was going to be	Maybe	1	1	1	1	FALSE	8-11
0.0518646	I don't mind - I'm not worried	A little bit nervous	Very nervous	I'm looking forward to it	0	What I thought it would be like	Yes	0	Better than I thought it was going to be	Yes	0	Better than I thought it was going to be	Maybe	0	Better than I thought it was going to be	Maybe	1	1	1	3	FALSE	8-11
5.22295	A little bit nervous	Very nervous	Very nervous	I don't mind - I'm not worried	2	Better than I thought it was going to be	Yes	8	Worse than I thought	No				0	Better than I thought it was going to be	Yes	2	3		1	TRUE	4-7
3.2082	A little bit nervous	A little bit nervous		Very nervous	4	What I thought it would be like	Maybe	2	What I thought it would be like	Maybe				2	Better than I thought it was going to be	Maybe	2	3		1	TRUE	8-11
7.96145	A little bit nervous	Very nervous	I'm looking forward to it	I don't mind - I'm not worried							6	Better than I thought it was going to be		8	Worse than I thought	No	1				FALSE	4-7
6.05219	I'm looking forward to it	I don't mind - I'm not worried		I'm looking forward to it	0	Better than I thought it was going to be	Yes	0	Better than I thought it was going to be	Yes				0	Better than I thought it was going to be	Yes	1	2		3	FALSE	4-7
4.16091	Very nervous	I'm looking forward to it	Very nervous	A little bit nervous	0	Better than I thought it was going to be	Yes	0	Better than I thought it was going to be	Yes				0	Better than I thought it was going to be	Yes	1	3		2	FALSE	8-11
7.27388	I don't mind - I'm not worried	I don't mind - I'm not worried		I don't mind - I'm not worried	0	What I thought it would be like	Maybe	6	Worse than I thought	No				0	What I thought it would be like		1	3		2	TRUE	8-11
2.32876	A little bit nervous	A little bit nervous	Very nervous	A little bit nervous	0			0			4	Worse than I thought	No	0	What I thought it would be like						FALSE	8-11
7.35413	I don't mind - I'm not worried	I don't mind - I'm not worried	I don't mind - I'm not worried	I don't mind - I'm not worried	0	What I thought it would be like	Yes	0	What I thought it would be like	Yes	2	Worse than I thought	Yes	0	What I thought it would be like	Yes					FALSE
0.435793	Very nervous	A little bit nervous	Very nervous	A little bit nervous																	FALSE	4-7
2.35272	I'm looking forward to it	I don't mind - I'm not worried	I'm looking forward to it	I don't mind - I'm not worried																	FALSE	8-11
7.15432	A little bit nervous	I don't mind - I'm not worried	A little bit nervous	I don't mind - I'm not worried	2	Better than I thought it was going to be	Yes	2	Better than I thought it was going to be	Yes	4	What I thought it would be like	Yes	0	Worse than I thought	Yes					FALSE	8-11
9.8828	I don't mind - I'm not worried	A little bit nervous	I don't mind - I'm not worried	I don't mind - I'm not worried	0	Better than I thought it was going to be	Yes	0	Better than I thought it was going to be	Yes	2	What I thought it would be like	Maybe	0	Worse than I thought	No					FALSE	8-11
5.44516	I don't mind - I'm not worried	I don't mind - I'm not worried	I'm looking forward to it	I don't mind - I'm not worried	0	Better than I thought it was going to be	Yes	0	Better than I thought it was going to be	Yes	0	Better than I thought it was going to be	Yes	0	Better than I thought it was going to be	Yes					FALSE	8-11
8.45547	I don't mind - I'm not worried	I don't mind - I'm not worried	I don't mind - I'm not worried	I don't mind - I'm not worried							2	Better than I thought it was going to be	Yes	0	Better than I thought it was going to be	Yes					FALSE	8-11
1.29023	I'm looking forward to it	I'm looking forward to it	A little bit nervous		0	Better than I thought it was going to be	Yes	2	Better than I thought it was going to be	Yes	2	Better than I thought it was going to be	Maybe	0	Better than I thought it was going to be	Yes					FALSE	4-7
9.47916	I don't mind - I'm not worried	A little bit nervous	I'm looking forward to it	I'm looking forward to it																	FALSE
8.47618	I don't mind - I'm not worried	I don't mind - I'm not worried	A little bit nervous	I'm looking forward to it	4	What I thought it would be like	No	6	Worse than I thought	No	2	What I thought it would be like	Maybe	0	Better than I thought it was going to be	Yes					FALSE	8-11
1.39908	I don't mind - I'm not worried	I don't mind - I'm not worried	A little bit nervous	I don't mind - I'm not worried	0	Better than I thought it was going to be	Maybe	0	Better than I thought it was going to be	Maybe	2	Better than I thought it was going to be	Maybe	0	Better than I thought it was going to be	Maybe					FALSE	8-11
2.88215		I don't mind - I'm not worried	I don't mind - I'm not worried	I don't mind - I'm not worried	0	What I thought it would be like	Yes	0	What I thought it would be like	Yes	0	What I thought it would be like	Yes	0	What I thought it would be like	Yes					FALSE	8-11
7.63206	Very nervous	Very nervous	Very nervous	I don't mind - I'm not worried	0	What I thought it would be like	Maybe	2	Better than I thought it was going to be	Maybe	6	Better than I thought it was going to be	No	0	Worse than I thought	No					FALSE	8-11
9.91973	I don't mind - I'm not worried	I don't mind - I'm not worried	A little bit nervous	I don't mind - I'm not worried	0	What I thought it would be like	Maybe	0	What I thought it would be like	Yes	2	What I thought it would be like	Maybe	0	What I thought it would be like	Maybe					FALSE	8-11
3.92092	A little bit nervous	A little bit nervous	A little bit nervous	Very nervous	2	What I thought it would be like	No	4	What I thought it would be like	No	4	What I thought it would be like	No	8	Worse than I thought	No					FALSE	8-11
5.47	I don't mind - I'm not worried	I don't mind - I'm not worried	I'm looking forward to it	I don't mind - I'm not worried	0	Better than I thought it was going to be	Yes	0	Better than I thought it was going to be	Yes	0	Better than I thought it was going to be	Yes	0	What I thought it would be like	Yes					FALSE	8-11
9.1891	A little bit nervous	I don't mind - I'm not worried	A little bit nervous	I don't mind - I'm not worried	0	Better than I thought it was going to be	Yes	0	Better than I thought it was going to be	Yes	2	Better than I thought it was going to be	Maybe	0	Better than I thought it was going to be	Yes					FALSE	8-11
7.80205	I don't mind - I'm not worried	I don't mind - I'm not worried	A little bit nervous	I don't mind - I'm not worried	0	What I thought it would be like	Yes	0	What I thought it would be like	Yes	2	What I thought it would be like	Yes	0	What I thought it would be like	Yes					FALSE	8-11
3.30815	I don't mind - I'm not worried	A little bit nervous	Very nervous	I don't mind - I'm not worried	0	What I thought it would be like	Yes	0	What I thought it would be like	Yes				0	What I thought it would be like	Yes					FALSE	8-11
2.2902	Very nervous	Very nervous	A little bit nervous	I'm looking forward to it							0	Better than I thought it was going to be		0	Better than I thought it was going to be	Yes					FALSE	8-11
6.43048	I don't mind - I'm not worried	I don't mind - I'm not worried	I don't mind - I'm not worried	I don't mind - I'm not worried	0	What I thought it would be like	Maybe	0	Worse than I thought	Maybe	0	Better than I thought it was going to be	Maybe	0	What I thought it would be like	Maybe					TRUE	8-11
4.66148	I'm looking forward to it	I'm looking forward to it	I'm looking forward to it	I'm looking forward to it		Better than I thought it was going to be			Better than I thought it was going to be		2	Better than I thought it was going to be	Yes	0	Better than I thought it was going to be	Yes					FALSE	8-11
9.24031	I don't mind - I'm not worried	A little bit nervous	A little bit nervous	I don't mind - I'm not worried	0	Better than I thought it was going to be	Maybe	0	Better than I thought it was going to be	Yes	4	What I thought it would be like	No	0	Better than I thought it was going to be	Yes					FALSE	8-11
4.35041	I don't mind - I'm not worried	I don't mind - I'm not worried	I'm looking forward to it	I'm looking forward to it																	FALSE	8-11
6.50165	I don't mind - I'm not worried	I don't mind - I'm not worried	A little bit nervous	I don't mind - I'm not worried	0	Better than I thought it was going to be	Yes	0	What I thought it would be like	Yes	2	Worse than I thought	Yes	0	Worse than I thought	Maybe					FALSE	8-11
2.66287	A little bit nervous	A little bit nervous	A little bit nervous	A little bit nervous	0	Better than I thought it was going to be	Yes	0	Better than I thought it was going to be	Yes	0	Better than I thought it was going to be	Yes	0	Better than I thought it was going to be	Yes					FALSE	8-11
0.905756	I don't mind - I'm not worried	I don't mind - I'm not worried	A little bit nervous	I don't mind - I'm not worried							2	Better than I thought it was going to be	Maybe	2	What I thought it would be like	Yes					FALSE	8-11
4.21675	I don't mind - I'm not worried	I don't mind - I'm not worried	A little bit nervous	I don't mind - I'm not worried	2	What I thought it would be like	Yes	2	What I thought it would be like	Yes	2	What I thought it would be like	Yes	0	Better than I thought it was going to be	Yes					FALSE	8-11
2.20943	I don't mind - I'm not worried	I don't mind - I'm not worried	I don't mind - I'm not worried	I don't mind - I'm not worried	0	What I thought it would be like	Yes	0	Better than I thought it was going to be	Yes	0	What I thought it would be like	Maybe	0	What I thought it would be like	Yes					FALSE	8-11
0.054552	A little bit nervous	A little bit nervous	Very nervous	A little bit nervous	2	What I thought it would be like	Maybe	2	What I thought it would be like	Maybe	0	Better than I thought it was going to be	No	0	What I thought it would be like	Maybe					FALSE	8-11
0.172286	A little bit nervous	I don't mind - I'm not worried	I don't mind - I'm not worried	I don't mind - I'm not worried	0	Better than I thought it was going to be	Yes	2	What I thought it would be like	Yes	2	What I thought it would be like	Yes	0	Better than I thought it was going to be	Yes					FALSE	8-11
5.91159	I don't mind - I'm not worried	I don't mind - I'm not worried	A little bit nervous	I don't mind - I'm not worried	0	What I thought it would be like	Yes	2	Worse than I thought	Yes	4	What I thought it would be like	Maybe	0	What I thought it would be like	Yes					FALSE	8-11
5.28919	I don't mind - I'm not worried	I don't mind - I'm not worried	A little bit nervous	I don't mind - I'm not worried	2	What I thought it would be like	Maybe	2	What I thought it would be like	Maybe	6	What I thought it would be like	No	0	Better than I thought it was going to be	Yes					FALSE	8-11
1.64026	I don't mind - I'm not worried	I don't mind - I'm not worried	I don't mind - I'm not worried	I don't mind - I'm not worried	0	Better than I thought it was going to be	Yes	0	Better than I thought it was going to be	Yes	2	What I thought it would be like	Yes	0	Better than I thought it was going to be	Yes					FALSE	8-11
6.35802	I'm looking forward to it	I'm looking forward to it	I'm looking forward to it	I'm looking forward to it	0	What I thought it would be like	Yes	0	What I thought it would be like	Yes	0	What I thought it would be like	Yes	0	What I thought it would be like	Yes					FALSE	8-11
7.44255	I'm looking forward to it	I'm looking forward to it	I'm looking forward to it	I don't mind - I'm not worried			Yes			Yes			Yes			Yes					FALSE	8-11
8.84073	I don't mind - I'm not worried	A little bit nervous	I'm looking forward to it	Very nervous	0	Better than I thought it was going to be	Yes	6	Worse than I thought	No				6	What I thought it would be like	No					FALSE	4-7
9.58497		I don't mind - I'm not worried		I don't mind - I'm not worried				6	Worse than I thought	Maybe				2	What I thought it would be like						TRUE
9.80184	A little bit nervous	I don't mind - I'm not worried	I don't mind - I'm not worried	I'm looking forward to it																	FALSE	4-7
0.842193	Very nervous	I don't mind - I'm not worried	Very nervous	I'm looking forward to it																	FALSE	4-7
2.40901	I'm looking forward to it	I don't mind - I'm not worried	A little bit nervous	I don't mind - I'm not worried																	FALSE	8-11
7.95518	I don't mind - I'm not worried	I'm looking forward to it	Very nervous	I don't mind - I'm not worried	4	What I thought it would be like	Maybe	0	Better than I thought it was going to be	Yes				0	Better than I thought it was going to be	Yes					FALSE	4-7
3.42157	I don't mind - I'm not worried	A little bit nervous	I'm looking forward to it	I'm looking forward to it	0	What I thought it would be like	Yes	0	What I thought it would be like	Yes	2	What I thought it would be like	Yes	0	What I thought it would be like	Yes					FALSE	8-11
2.51656	A little bit nervous	I don't mind - I'm not worried	A little bit nervous	I don't mind - I'm not worried																	FALSE	4-7
7.93495	I'm looking forward to it	I don't mind - I'm not worried	I don't mind - I'm not worried	I don't mind - I'm not worried	2	What I thought it would be like	Maybe	0	What I thought it would be like	Yes	4	Better than I thought it was going to be	No	0	Better than I thought it was going to be	Yes					FALSE
7.82877	I'm looking forward to it	I'm looking forward to it	I'm looking forward to it	I don't mind - I'm not worried	0	Better than I thought it was going to be	Yes	0	Better than I thought it was going to be	Yes											FALSE
9.11366	A little bit nervous	I don't mind - I'm not worried	Very nervous	I don't mind - I'm not worried																	FALSE	4-7
8.38489	I don't mind - I'm not worried	I don't mind - I'm not worried	I'm looking forward to it	I don't mind - I'm not worried	2	What I thought it would be like	Yes	0	What I thought it would be like	Yes	0	Better than I thought it was going to be	Yes	0	Better than I thought it was going to be	Yes					FALSE	8-11
9.30901	I don't mind - I'm not worried	A little bit nervous	A little bit nervous	I don't mind - I'm not worried							4	Worse than I thought	Maybe	0	What I thought it would be like	Yes					FALSE	8-11
2.879	I'm looking forward to it	I don't mind - I'm not worried	A little bit nervous	A little bit nervous	0	Better than I thought it was going to be	Yes	2	What I thought it would be like	Yes	4	What I thought it would be like	Yes	0	Better than I thought it was going to be						FALSE	8-11
8.67848	I don't mind - I'm not worried	I don't mind - I'm not worried	A little bit nervous	I don't mind - I'm not worried			No														FALSE	8-11
7.19492	I don't mind - I'm not worried	I don't mind - I'm not worried	I don't mind - I'm not worried	I don't mind - I'm not worried	0	What I thought it would be like	Yes	0	What I thought it would be like	Yes	2	What I thought it would be like	Maybe	0	What I thought it would be like	Yes					FALSE	8-11
6.59701	I don't mind - I'm not worried	I don't mind - I'm not worried	I don't mind - I'm not worried	I don't mind - I'm not worried							0	What I thought it would be like	Yes	0	What I thought it would be like	Yes					FALSE	8-11
8.19582	A little bit nervous	A little bit nervous	Very nervous	I don't mind - I'm not worried																	TRUE
4.49077	A little bit nervous	I don't mind - I'm not worried	I'm looking forward to it	I'm looking forward to it																	TRUE	4-7
2.57556	Very nervous	Very nervous	I don't mind - I'm not worried	I don't mind - I'm not worried	2	Better than I thought it was going to be	Maybe	4	Better than I thought it was going to be	No	2	What I thought it would be like	Maybe	0	Worse than I thought	Maybe					FALSE	8-11
2.87449	I don't mind - I'm not worried	I don't mind - I'm not worried	A little bit nervous	I don't mind - I'm not worried	0	Better than I thought it was going to be	Maybe	0	Better than I thought it was going to be	Maybe	4	Better than I thought it was going to be	No	0	Better than I thought it was going to be	Maybe					FALSE	8-11
4.95034	A little bit nervous	A little bit nervous	I don't mind - I'm not worried	A little bit nervous							0	What I thought it would be like	Yes	4	What I thought it would be like	Maybe					FALSE	8-11
9.64784	A little bit nervous	I don't mind - I'm not worried	A little bit nervous	I don't mind - I'm not worried	2	Better than I thought it was going to be	Yes	0	What I thought it would be like	Yes	4	Better than I thought it was going to be	Yes	0	What I thought it would be like	Yes					FALSE	8-11
0.54263	I don't mind - I'm not worried	A little bit nervous	A little bit nervous	I don't mind - I'm not worried	0	Better than I thought it was going to be	Yes	0	What I thought it would be like	Yes	2	Better than I thought it was going to be	Maybe	0	What I thought it would be like	Yes					FALSE	8-11
5.35441	A little bit nervous	I don't mind - I'm not worried	Very nervous	I don't mind - I'm not worried	0	What I thought it would be like	Yes	0	What I thought it would be like	Yes	6	What I thought it would be like	Maybe	0	What I thought it would be like	Yes					FALSE	8-11
5.28297	Very nervous	I'm looking forward to it	Very nervous	A little bit nervous																	FALSE	4-7
4.99767	I don't mind - I'm not worried	A little bit nervous	A little bit nervous	I don't mind - I'm not worried	0	Better than I thought it was going to be	Maybe	0	What I thought it would be like	Maybe	2	What I thought it would be like	Maybe	0	What I thought it would be like	No					FALSE	8-11
9.03486	I don't mind - I'm not worried	I don't mind - I'm not worried	A little bit nervous	I don't mind - I'm not worried	0	Better than I thought it was going to be	Maybe	0	Better than I thought it was going to be	Maybe	0	Better than I thought it was going to be	Maybe	0	Better than I thought it was going to be	Maybe					FALSE	8-11
8.31424	I'm looking forward to it	I don't mind - I'm not worried	I don't mind - I'm not worried	I don't mind - I'm not worried	0	What I thought it would be like	Yes	0	What I thought it would be like	Yes	2	What I thought it would be like	Yes	0	What I thought it would be like	Yes					FALSE	8-11
1.31242	I'm looking forward to it	I don't mind - I'm not worried	I'm looking forward to it	I'm looking forward to it	0	What I thought it would be like	Yes	0	Better than I thought it was going to be	Yes	2	What I thought it would be like	Yes	0	Better than I thought it was going to be	Yes					FALSE	8-11
3.75552	I'm looking forward to it	A little bit nervous	I'm looking forward to it	I'm looking forward to it	0	Better than I thought it was going to be	Yes	4	Better than I thought it was going to be	Maybe				0	Better than I thought it was going to be	Maybe					FALSE	4-7
4.61996	I'm looking forward to it	I'm looking forward to it	I'm looking forward to it	I'm looking forward to it	0	What I thought it would be like	No	0	What I thought it would be like	No	0	Better than I thought it was going to be	No	0	Better than I thought it was going to be	No					FALSE	4-7
1.96074	A little bit nervous	Very nervous	I'm looking forward to it	Very nervous	10	Worse than I thought	No	10		No											FALSE	4-7
7.63265	A little bit nervous	I don't mind - I'm not worried	I don't mind - I'm not worried	I'm looking forward to it	2	Worse than I thought	No	6	Worse than I thought	No				0	Better than I thought it was going to be	No					FALSE	4-7
1.43329	A little bit nervous	I don't mind - I'm not worried	Very nervous	I'm looking forward to it	2	Better than I thought it was going to be	Yes	2	Better than I thought it was going to be	Yes	4	Better than I thought it was going to be	Maybe	2	What I thought it would be like	Yes					FALSE	8-11
5.49377	I don't mind - I'm not worried	I don't mind - I'm not worried	Very nervous	I don't mind - I'm not worried																	FALSE
1.10343	I'm looking forward to it	A little bit nervous	I'm looking forward to it	I don't mind - I'm not worried	0	Better than I thought it was going to be	Yes	2	What I thought it would be like	No	2	Better than I thought it was going to be	Yes	0	Better than I thought it was going to be	Yes					FALSE
3.37516	I don't mind - I'm not worried	I don't mind - I'm not worried	I don't mind - I'm not worried	I'm looking forward to it	2	What I thought it would be like	No	4	What I thought it would be like	No	4	What I thought it would be like	No	0	What I thought it would be like	No					FALSE
8.71214	I don't mind - I'm not worried	I'm looking forward to it	I don't mind - I'm not worried	I'm looking forward to it	4	Worse than I thought	Yes	0	What I thought it would be like	Yes	2	Worse than I thought	Yes	0	Better than I thought it was going to be	Yes					FALSE
3.70403	I don't mind - I'm not worried	I don't mind - I'm not worried	A little bit nervous	I don't mind - I'm not worried	0	What I thought it would be like	Yes	2	What I thought it would be like	Yes	2	Better than I thought it was going to be	Yes	0	What I thought it would be like	Yes					FALSE
9.51863	I don't mind - I'm not worried	A little bit nervous	A little bit nervous	A little bit nervous	0	What I thought it would be like	Yes	0	What I thought it would be like	Yes	2	Better than I thought it was going to be	No	4	What I thought it would be like	No					FALSE
8.62349	I don't mind - I'm not worried	A little bit nervous	I don't mind - I'm not worried	I'm looking forward to it	2	Better than I thought it was going to be	Maybe	4	What I thought it would be like	Maybe	6	Better than I thought it was going to be	No	0	What I thought it would be like	No					FALSE
7.43668	I don't mind - I'm not worried	I don't mind - I'm not worried	A little bit nervous	I don't mind - I'm not worried	0	Better than I thought it was going to be	Yes	0	Better than I thought it was going to be	Yes	2	Better than I thought it was going to be	No	0	Better than I thought it was going to be	Yes					FALSE
1.5739	A little bit nervous	A little bit nervous	Very nervous	A little bit nervous	0	What I thought it would be like	Maybe	2	Worse than I thought	Maybe	10	Worse than I thought	No	0	Worse than I thought	Maybe					FALSE	4-7
7.64364	A little bit nervous	A little bit nervous	Very nervous	A little bit nervous	0	What I thought it would be like	Maybe	0	What I thought it would be like	Maybe	6	What I thought it would be like	No	0	What I thought it would be like	Maybe					FALSE	8-11
8.13747	I don't mind - I'm not worried	I don't mind - I'm not worried	A little bit nervous	I don't mind - I'm not worried	0	Better than I thought it was going to be	Yes	0	Better than I thought it was going to be	Yes	4	Worse than I thought	Yes	0	Better than I thought it was going to be	Yes					FALSE
4.43916	A little bit nervous	A little bit nervous	A little bit nervous	I don't mind - I'm not worried	0	Better than I thought it was going to be	Yes	4	What I thought it would be like	Maybe	2	Better than I thought it was going to be	Yes	0	Better than I thought it was going to be	Yes					FALSE
8.0119	I don't mind - I'm not worried	I don't mind - I'm not worried	I don't mind - I'm not worried	I don't mind - I'm not worried	0	What I thought it would be like		0	What I thought it would be like		0	What I thought it would be like		0	What I thought it would be like						FALSE	8-11
3.68522	I don't mind - I'm not worried	A little bit nervous	Very nervous	A little bit nervous	2	Better than I thought it was going to be	Maybe	0	Better than I thought it was going to be	Yes	4	What I thought it would be like	No	0	What I thought it would be like	Yes					FALSE	8-11
8.55191	I don't mind - I'm not worried	I don't mind - I'm not worried	A little bit nervous	I don't mind - I'm not worried	2	What I thought it would be like	Yes	2	What I thought it would be like	Yes	4	Better than I thought it was going to be	Maybe	0	What I thought it would be like	Yes					FALSE	8-11
0.64106	A little bit nervous	I don't mind - I'm not worried	Very nervous	I don't mind - I'm not worried	0	Better than I thought it was going to be	Yes	0	What I thought it would be like	Yes	6	Worse than I thought	No	0	Worse than I thought	Yes					FALSE
1.17875	I don't mind - I'm not worried	I don't mind - I'm not worried	Very nervous	I don't mind - I'm not worried	0	What I thought it would be like	Yes	0	Better than I thought it was going to be	Yes	2	Better than I thought it was going to be	Maybe	0	What I thought it would be like	Yes					FALSE
2.83239	I don't mind - I'm not worried	I don't mind - I'm not worried	I don't mind - I'm not worried	I don't mind - I'm not worried	0	Better than I thought it was going to be	Yes	0	Better than I thought it was going to be	Yes	0	Better than I thought it was going to be	Yes	0	Worse than I thought	Yes					FALSE	8-11
3.65413	I don't mind - I'm not worried	A little bit nervous	Very nervous	I don't mind - I'm not worried	2	Worse than I thought	Yes	0	Better than I thought it was going to be	Yes	0	Better than I thought it was going to be	Yes	0							FALSE	8-11
2.98834	A little bit nervous	Very nervous	Very nervous	A little bit nervous	4	Worse than I thought	Maybe	4	What I thought it would be like	Maybe	0	Better than I thought it was going to be	Yes	4	Worse than I thought	Maybe					FALSE	4-7
9.55959	I'm looking forward to it	I'm looking forward to it	I'm looking forward to it	I don't mind - I'm not worried	0	Better than I thought it was going to be	Yes	0	Better than I thought it was going to be	Yes	0	What I thought it would be like	Yes	0	Worse than I thought	Maybe					FALSE
7.8477	I don't mind - I'm not worried	I don't mind - I'm not worried	A little bit nervous	I don't mind - I'm not worried	0	Better than I thought it was going to be	Yes	0	Better than I thought it was going to be	Yes	8	Worse than I thought	No	0	What I thought it would be like	Maybe					FALSE
1.02066	A little bit nervous	A little bit nervous	A little bit nervous	A little bit nervous	0	Better than I thought it was going to be	Yes	0	What I thought it would be like	Maybe	4	Worse than I thought	Maybe	0	What I thought it would be like	Maybe					FALSE
1.82364	A little bit nervous	A little bit nervous	A little bit nervous	A little bit nervous	0	Better than I thought it was going to be	Yes	0	Better than I thought it was going to be	Yes	6	Worse than I thought	No	0	Better than I thought it was going to be	Yes					FALSE
3.86651	I don't mind - I'm not worried	I don't mind - I'm not worried	A little bit nervous	I don't mind - I'm not worried	2	Better than I thought it was going to be	Yes	4	Better than I thought it was going to be	Maybe	8	What I thought it would be like	No	4	What I thought it would be like	Maybe					FALSE
6.77781	I don't mind - I'm not worried	I don't mind - I'm not worried	I don't mind - I'm not worried	I don't mind - I'm not worried	0	What I thought it would be like	Yes	0	What I thought it would be like	Yes	2	What I thought it would be like	Yes	0	What I thought it would be like	Yes					FALSE
2.09362	I don't mind - I'm not worried	A little bit nervous	A little bit nervous	I don't mind - I'm not worried	0	Better than I thought it was going to be	Yes	0	Better than I thought it was going to be	Yes	0	Better than I thought it was going to be	Yes	0	Better than I thought it was going to be	Yes					FALSE
7.33476	I'm looking forward to it	I don't mind - I'm not worried	I'm looking forward to it	I'm looking forward to it	6	Better than I thought it was going to be	Yes	0	Better than I thought it was going to be	Yes	6	Better than I thought it was going to be	Yes	0	Better than I thought it was going to be	Yes					FALSE
2.76068	I don't mind - I'm not worried	I'm looking forward to it	A little bit nervous	I don't mind - I'm not worried	0	Better than I thought it was going to be	Yes	0	Better than I thought it was going to be	Yes	2	Better than I thought it was going to be	Maybe	6	Better than I thought it was going to be	Maybe					FALSE
9.80014																					FALSE
4.28822	A little bit nervous	A little bit nervous	Very nervous	Very nervous	0	What I thought it would be like	No	0	What I thought it would be like	No	2	What I thought it would be like	No	0	What I thought it would be like						TRUE
9.83782	Very nervous	A little bit nervous	Very nervous	Very nervous	0	Worse than I thought	Yes	2	Better than I thought it was going to be	No	2	Better than I thought it was going to be	No								FALSE
1.1243																	=

## Sheet: pg&staff_questionnaire
plosone_id	Staff/PG	blood_school	Gender	Feasibility_Nose_Swab	Feasibility_Throat_Swab	Feasibility_Saliva_Swab	Feasibility_Blood_Test	Further_Comments
4.78928	Staff	y
3.23639	Staff	y
9.93513	PG	y	Female
1.26041	Staff	y	Female
6.42295	Staff	y	Female
8.78188	Staff	y	Female
2.54156	Staff	y
9.79931	PG	y	Female
1.15822	Staff	y	Female
7.96559	Staff	y	Female
4.90426	Staff	y	Female
9.45742	PG	y	Female
0.86201	PG	y		At the beginning and end of each term	At the beginning and end of each term	The frequency of swabbing does not bother me	At the beginning and end of each term
4.31207	Staff	y	Female	The frequency of swabbing does not bother me	The frequency of swabbing does not bother me	The frequency of swabbing does not bother me	The frequency of swabbing does not bother me
3.16584	Staff	y		The frequency of swabbing does not bother me	The frequency of swabbing does not bother me	The frequency of swabbing does not bother me	The frequency of swabbing does not bother me
8.13529	PG	y	Male	Once a week	Once a week	Once a week	Once a week
0.474988	PG	y	Male	Once a month	Once a month	Once a month	At the beginning and end of each term
0.62683	PG	y	Female	The frequency of swabbing does not bother me	The frequency of swabbing does not bother me	The frequency of swabbing does not bother me	The frequency of swabbing does not bother me
1.15159	PG	y		Once a month	Once a month	Once a month	Once a month
3.66755	PG	y	Male	Once a month	Once a month	Once a month	Once a month
8.22276	PG	y	Female	Once a month	Once a month	Once a month	Once a month
6.8389	PG	y	Male	Once a month	Once a month	Once a month	Once a month
4.18813	Staff	y	Female	At the beginning and end of each half-term	At the beginning and end of each half-term	At the beginning and end of each half-term	At the beginning and end of each half-term
0.359129	PG	y	Male	Once a month	Once a month	Once a month	Once a month
5.23183	PG	y	Male	Once a month	Once a month	Once a month	Once a month
3.98705	PG	y	Female	The frequency of swabbing does not bother me	The frequency of swabbing does not bother me	The frequency of swabbing does not bother me	The frequency of swabbing does not bother me
9.11564	Staff	y	Female	At the beginning and end of each half-term	At the beginning and end of each half-term	At the beginning and end of each half-term	At the beginning and end of each half-term
5.19511	PG	y	Female	The frequency of swabbing does not bother me	The frequency of swabbing does not bother me	The frequency of swabbing does not bother me	The frequency of swabbing does not bother me
0.123372	PG	y	Male	The frequency of swabbing does not bother me	The frequency of swabbing does not bother me	The frequency of swabbing does not bother me	Once a month
0.330664	PG	y	Female	Once a month	I wouldn't agree to have any more swabs done	I wouldn't agree to have any more swabs done	I wouldn't agree to have any more tests done
8.7487	PG	y	Female	The frequency of swabbing does not bother me	The frequency of swabbing does not bother me	The frequency of swabbing does not bother me	Once a month
5.4846	PG	y	Female	Once a month	Once a month	Once a month	Once a month
7.00891	PG	y	Female	Once a month	Once a month	Once a week	I wouldn't agree to have any more tests done
8.11782	Staff	n	Female	Once a week	Once a week	Once a week	Once a week
1.57721	PG	n	Female	The frequency of swabbing does not bother me	The frequency of swabbing does not bother me	The frequency of swabbing does not bother me	The frequency of swabbing does not bother me
1.30856	PG	n	Female	Once a week	I wouldn't agree to have any more swabs done	Once a week	I wouldn't agree to have any more tests done
3.93394	PG	n	Male	Once a week	Once a week	Once a week	Once a month
3.7147	PG	n	Male	At the beginning and end of each term	At the beginning and end of each term	At the beginning and end of each term	At the beginning and end of each term
1.60235	PG	n	Male	The frequency of swabbing does not bother me	The frequency of swabbing does not bother me	The frequency of swabbing does not bother me	Once a month
6.23317	PG	n	Male	The frequency of swabbing does not bother me	The frequency of swabbing does not bother me	The frequency of swabbing does not bother me	The frequency of swabbing does not bother me
6.96893	PG	n	Male	Once a month	Once a month	The frequency of swabbing does not bother me	Once a month
9.47339	PG	n	Female	Once a week	I wouldn't agree to have any more swabs done	Once a week	I wouldn't agree to have any more tests done
3.82353	PG	n	Male	Once a week	I wouldn't agree to have any more swabs done	Once a week	I wouldn't agree to have any more tests done
4.52317	PG	n	Male	Once a week	Once a week	Once a week	Once a week
4.21899	PG	n	Male	Once a month	I wouldn't agree to have any more swabs done	At the beginning and end of each term	I wouldn't agree to have any more tests done
8.23973	PG	n	Male	Once a month	I wouldn't agree to have any more swabs done	At the beginning and end of each term	I wouldn't agree to have any more tests done
0.205026	PG	n	Female	Daily	Daily	Daily	Daily
2.64464	PG	n	Female
8.24242	PG	n	Male	Daily	Once a week	Daily	Daily
4.53997	PG	n	Female	Once a week	Once a week		Once a week
5.6404	Staff	n	Female	Once a week	Once a week	Once a week	At the beginning and end of each term
7.75849	PG	n	Male	Once a week	Once a week	Once a week
1.46184	PG	n	Male	Once a week	Once a week	Once a week		Not sure why need a blood test but if necessary would decide then
5.39381	Staff	n	Female
4.58474	PG	n	Male	Once a week	Once a week	Once a week	Once a week
0.985775	Staff	n	Female	Once a week	Once a week	Once a week	Once a week
0.214788	PG	n		Once a week	Once a week	Once a week	The frequency of swabbing does not bother me
2.27216	PG	n	Male	Once a month	Once a month	Once a month	Once a month
8.56534	PG	n	Male	At the beginning and end of each half-term	Once a week	Once a week	Once a month
1.95339	Staff	n	Female	Once a month	Once a month	Once a month	Once a month
0.715092	PG	n	Male	Once a week	Once a week	Once a week	Once a month
6.63453	PG	n	Female
3.82525	PG	n	Female
9.04451	PG	n	Female
5.14481	Staff	n	Male	Once a week	The frequency of swabbing does not bother me	The frequency of swabbing does not bother me	The frequency of swabbing does not bother me
1.80252	Staff	n	Female	Once a week	At the beginning and end of each half-term	Once a week	At the beginning and end of each term
9.9877	Staff	n	Female	Daily	Daily	Daily	Once a month
7.29382	PG	n	Male	Once a week				No surnames provided. Family is Iranian. During lockdown patient did not attend school
4.20176	PG	n	Male	At the beginning and end of each term	At the beginning and end of each term	At the beginning and end of each term	Once a month
6.24227	PG	n	Female	Once a week	Once a week	Once a week
2.63249	PG	n	Female	Once a week	Once a week	Once a week
3.49186	PG	n	Male	Once a week	Once a week	Once a week	Once a week
4.48137	PG	n	Female	Once a week	Once a week	Once a week	The frequency of swabbing does not bother me
8.35926	PG	n	Female	Once a week	Once a month	Once a month	At the beginning and end of each half-term
7.07361	PG	n	Male	Once a week	Once a month	Once a week	Once a month
9.33246	PG	n		Once a week	Once a week	Once a week	Once a month
5.79002	PG	n		Once a week	Once a week	Once a week	At the beginning and end of each term
0.104793	PG	n	Female	Once a week	Once a week	Once a week	Once a week
3.55962	PG	n	Male				Once a month
4.03911	PG	n	Female	Once a week	Once a week	Once a week	Once a month
6.57274	PG	n	Female	Once a week	Once a week	Once a week	Once a month
6.43094	PG	n	Male	Once a week	Once a week	Once a week	At the beginning and end of each half-term
2.50002	PG	n	Female	Once a week	Once a week	Once a week
2.87611	Staff	n	Female	Once a week	Once a month	Once a week	Once a month
3.60777	PG	n	Female	At the beginning and end of each half-term	At the beginning and end of each half-term	At the beginning and end of each half-term	At the beginning and end of each half-term
1.38933	PG	n	Male	Once a week	Once a week	Once a week	Once a month
6.74953	PG	n	Female	Once a week	Once a week	Once a week	Once a month
0.262466	PG	n	Female	Daily	Daily	Daily	Daily
6.95098	PG	n	Female	Once a week	I wouldn't agree to have any more swabs done	Once a week	I wouldn't agree to have any more tests done	No TS and blood test
1.62648	PG	n	Female	Once a week	Once a week	Once a week
7.24146	PG	n	Male	Once a week	Once a month	Once a week	Once a month
5.99013	PG	n	Male	Once a week	Once a week	Once a week	At the beginning and end of each half-term
8.06201	PG	n	Female	Once a week
8.95713	PG	n	Female	Once a week	At the beginning and end of each half-term	Once a week	At the beginning and end of each half-term
2.33955	PG	n	Male	Once a week	I wouldn't agree to have any more swabs done	I wouldn't agree to have any more swabs done	I wouldn't agree to have any more tests done	Just to stick to nasal swab only please
9.18927	PG	n	Female	Once a week	Once a month	Once a month	I wouldn't agree to have any more tests done
9.69362	PG	n	Male	At the beginning and end of each half-term	I wouldn't agree to have any more swabs done	At the beginning and end of each half-term	At the beginning and end of each half-term
1.96297	PG	n	Female	At the beginning and end of each half-term	I wouldn't agree to have any more swabs done	At the beginning and end of each half-term	At the beginning and end of each half-term
2.23546	PG	n	Male	Once a week	Once a week	Once a week	Once a month
8.15226	Staff	n		Once a week	Once a week	Once a week	Once a week
1.39832	Staff	n	Female	The frequency of swabbing does not bother me
8.33646	Staff	n	Male	I wouldn't agree to have any more swabs done	I wouldn't agree to have any more swabs done		I wouldn't agree to have any more tests done
7.91771	PG	n	Male	Once a month	Once a month	I wouldn't agree to have any more swabs done	I wouldn't agree to have any more tests done
0.361674	PG	n	Female	The frequency of swabbing does not bother me	The frequency of swabbing does not bother me	The frequency of swabbing does not bother me	At the beginning and end of each term
4.75023	PG	n		Once a week	Once a week	Once a month	Once a month
9.52041	PG	n	Male	Once a week
4.24903	PG	n	Female		I wouldn't agree to have any more swabs done		I wouldn't agree to have any more tests done	no school during lockdown, nose swab whatever is neccesary. No throat swab and no blood test
3.78941	PG	n	Male	Twice a week	Once a week	Twice a week	Once a week
9.07583	PG	n	Female	Twice a week	Twice a week	Twice a week	Twice a week
6.05612	PG	n	Female	Once a week	I wouldn't agree to have any more swabs done	I wouldn't agree to have any more swabs done	I wouldn't agree to have any more tests done
0.686075	PG	n	Female	The frequency of swabbing does not bother me	The frequency of swabbing does not bother me	The frequency of swabbing does not bother me	At the beginning and end of each half-term
8.34695	PG	n	Female	The frequency of swabbing does not bother me	The frequency of swabbing does not bother me	The frequency of swabbing does not bother me	I wouldn't agree to have any more tests done
5.00326	PG	n	Male	The frequency of swabbing does not bother me	The frequency of swabbing does not bother me	The frequency of swabbing does not bother me	The frequency of swabbing does not bother me
4.62748	PG	n	Male	Once a week	Once a week	I wouldn't agree to have any more swabs done	I wouldn't agree to have any more tests done
8.45041	PG	n	Female	Once a week
7.41496	PG	n	Male	Once a week
3.2239	PG	n	Female	Once a week	I wouldn't agree to have any more swabs done	Once a week	I wouldn't agree to have any more tests done
2.6462	PG	n	Female	Once a month	Once a month	Once a month	I wouldn't agree to have any more tests done
0.842549	PG	n	Male	The frequency of swabbing does not bother me	The frequency of swabbing does not bother me	The frequency of swabbing does not bother me	Once a month
2.79688	PG	n	Female	Once a week	Once a month	Once a month	I wouldn't agree to have any more tests done
2.52845	PG	n	Male	Once a week	I wouldn't agree to have any more swabs done	I wouldn't agree to have any more swabs done	I wouldn't agree to have any more tests done
1.05358	PG	n	Male	Once a week	I wouldn't agree to have any more swabs done	I wouldn't agree to have any more swabs done	I wouldn't agree to have any more tests done
7.27871	PG	n	Female	Once a week	I wouldn't agree to have any more swabs done	I wouldn't agree to have any more swabs done	I wouldn't agree to have any more tests done
4.49589	PG	n	Male	Once a week	I wouldn't agree to have any more swabs done	I wouldn't agree to have any more swabs done	I wouldn't agree to have any more tests done
2.16116	PG	n	Female	Once a week	I wouldn't agree to have any more swabs done	I wouldn't agree to have any more swabs done	I wouldn't agree to have any more tests done
9.19536	PG	n	Female	Once a week	I wouldn't agree to have any more swabs done	I wouldn't agree to have any more swabs done	I wouldn't agree to have any more tests done
2.9875	PG	n	Female	Once a week	Once a week	Once a week	Once a month
5.03086	PG	n	Male	Once a week	I wouldn't agree to have any more swabs done	I wouldn't agree to have any more swabs done	I wouldn't agree to have any more tests done	Guidance in this letter only mentioned nasal swabs, yet questionnaire detailed throat saliva and blood test. ONLY happy with nasal swabs.
2.44851	PG	n	Female	Once a month	Once a month	Once a month	At the beginning and end of each term
8.71499	Staff	y	Female
6.00161	PG	y	Male
1.93911	Staff	y	Female
5.05204	PG	y	Female
2.80548	Staff	y	Male
8.61597	Staff	y	Male
6.6541	Staff	y	Male
0.562612	Staff	y
6.44625	Staff	y	Male
8.34197	Staff	y	Female
7.55333	Staff	y	Female
1.71435	Staff	y	Female
9.84754	Staff	y	Male
0.195884	Staff	y		Once a month	Once a month	Once a week	Once a month
9.2716	PG	y	Female	I wouldn't agree to have any more swabs done	At the beginning and end of each term	Once a month	At the beginning and end of each term
1.76624	PG	y	Female	Once a month	Once a month	Once a month	Once a month
6.71586	Staff	y	Female
1.718	PG	y	Female
8.65539	PG	y	Female
9.84353	PG	y	Female	At the beginning and end of each term	At the beginning and end of each term	At the beginning and end of each term	At the beginning and end of each term
9.00032	Staff	y		Once a month	Once a month	Once a month	Once a month
3.53711	PG	y	Male	At the beginning and end of each half-term	At the beginning and end of each half-term	At the beginning and end of each half-term	At the beginning and end of each half-term
4.76289	Staff	y	Female	The frequency of swabbing does not bother me	The frequency of swabbing does not bother me	The frequency of swabbing does not bother me	The frequency of swabbing does not bother me
4.88933	PG			Once a week	Once a week	Once a week	Once a month
1.56042	PG		Female	Once a month	I wouldn't agree to have any more swabs done	At the beginning and end of each half-term	I wouldn't agree to have any more tests done
6.08745	Staff		Female			Once a month	I wouldn't agree to have any more tests done
9.21561	Staff			The frequency of swabbing does not bother me	The frequency of swabbing does not bother me	The frequency of swabbing does not bother me	The frequency of swabbing does not bother me
7.85221	Staff		Female	Once a week	Once a week	Once a week	At the beginning and end of each half-term
2.53149	Staff		Female	Once a week		Once a week	Once a week
6.14428	PG		Female
5.77362	PG		Male	Once a month	Once a month	Once a month	Once a month	5th child * years
3.53956	Staff		Female	Once a week	I wouldn't agree to have any more swabs done	I wouldn't agree to have any more swabs done	I wouldn't agree to have any more tests done
9.20886	PG		Female	Once a week	Once a week	Once a week	Once a week
9.93908	PG		Female	Twice a week	Once a week	Twice a week	I wouldn't agree to have any more tests done	3rd child's age is*. Consent form hasn't been signed by parents. All left blank.
0.280515	PG		Female	Once a week	I wouldn't agree to have any more swabs done	The frequency of swabbing does not bother me	Once a month	kids age- *,*,*
4.34315	PG		Male	Once a week	Once a week	Once a week
3.88977	Staff		Female	At the beginning and end of each half-term
0.916585	PG		Male	Once a week	I wouldn't agree to have any more swabs done	I wouldn't agree to have any more swabs done	I wouldn't agree to have any more tests done	child is autistic and when doing nose swab if he does not like itstop immediatley
3.38122	PG		Female	Once a week	Once a week	Once a week	I wouldn't agree to have any more tests done
6.30781	Staff		Female	Once a month	Once a month	Once a month	I wouldn't agree to have any more tests done
0.760087	Staff		Female	I wouldn't agree to have any more swabs done	I wouldn't agree to have any more swabs done	I wouldn't agree to have any more swabs done	I wouldn't agree to have any more tests done
4.36734	PG		Female	Once a week	I wouldn't agree to have any more swabs done	I wouldn't agree to have any more swabs done	I wouldn't agree to have any more tests done
5.95535	Staff		Female	Once a week	Once a week	Once a week	I wouldn't agree to have any more tests done
2.57415	Staff		Female	Once a week	I wouldn't agree to have any more swabs done	I wouldn't agree to have any more swabs done	I wouldn't agree to have any more tests done
6.29511	PG	y
4.44684	PG	y	Male
1.04848	PG	y
9.66072	PG	y	Female
0.0448497	Staff	y	Female
0.140631	Staff	y	Female
8.29096	Staff	y
9.62057	Staff	y	Female
7.98861	Staff	y
7.48738	PG	y	Female
2.75322	Staff	y
7.73181	PG	y	Male
2.35994	PG	y	Female
0.903754	PG	y	Male
1.30499	PG	y	Female
2.58713	PG	y	Female
1.43102	PG	y	Female					**/**/**** **:** - telephone call to mother to confirm consent (as she didn't initial only ticked) * * (*)
9.65183	PG	y	Male					**/**/**** **:** - telephone call to mother to confirm consent (as she didn't initial only ticked) * * (**)
3.35995	Staff	y
2.97419	Staff	y
4.52448	Staff	y
6.72607	Staff	y
0.693975	PG	y		At the beginning and end of each half-term	At the beginning and end of each half-term	Once a month	At the beginning and end of each half-term
0.434736	Staff	y	Female	The frequency of swabbing does not bother me	The frequency of swabbing does not bother me	The frequency of swabbing does not bother me	Once a month
4.89474	PG	y	Female	The frequency of swabbing does not bother me	The frequency of swabbing does not bother me	The frequency of swabbing does not bother me	The frequency of swabbing does not bother me
4.10496	PG	y		I wouldn't agree to have any more swabs done	I wouldn't agree to have any more swabs done	I wouldn't agree to have any more swabs done	I wouldn't agree to have any more tests done
3.90562	PG	y	Female	The frequency of swabbing does not bother me	The frequency of swabbing does not bother me	The frequency of swabbing does not bother me	The frequency of swabbing does not bother me
1.44584	PG	y	Male	At the beginning and end of each half-term	At the beginning and end of each half-term	At the beginning and end of each half-term	At the beginning and end of each half-term
9.66798	Staff	y	Female	At the beginning and end of each term	At the beginning and end of each term	At the beginning and end of each term	At the beginning and end of each term
0.335743	Staff	y
0.880263	PG	y
2.23527	Staff	y		Once a week	Once a week	Daily	Once a week
4.87722	Staff	y
2.20046	Staff	y
4.89582	Staff	y
7.28948	Staff	y
9.83661	Staff	y
8.92313	PG	y	Male
7.72158	PG	y	Female
8.35521	PG	y
8.78308	PG	y
8.73659	PG	y	Male
1.04208	PG	y	Male
9.42703	Staff	y
8.00613	Staff	y
2.50602	Staff	y
2.13965	Staff	y
7.53828	PG	y	Male
9.93696	PG	y	Male
5.58662	PG	y	Male
9.58754	PG	y
7.96009	PG	y	Female
3.40935	PG	y	Female
6.49676	PG	y	Male
9.30212	PG	y
1.26129	PG	y	Female
7.29196	PG	y
2.2096	PG	y	Male
9.81805	PG	y	Female
2.55852	PG	y	Female
5.98926	PG	y	Male
0.956418	PG	y		Once a month	Once a month	Once a month	Once a month
3.39298	PG	y	Female	At the beginning and end of each half-term	At the beginning and end of each half-term	At the beginning and end of each half-term	At the beginning and end of each half-term
2.74351	PG	y		At the beginning and end of each term	At the beginning and end of each term	At the beginning and end of each term	At the beginning and end of each term	The best option for testing would be every 6 months.
6.68188	PG	y		Once a week	I wouldn't agree to have any more swabs done	Once a week	Once a month
4.37628	PG	y	Female	At the beginning and end of each term	At the beginning and end of each term	At the beginning and end of each term	At the beginning and end of each term
0.302653	Staff	y	Female	Daily		Daily	Daily
3.83681	PG	y	Female	Once a month	Once a month	Once a month	I wouldn't agree to have any more tests done
6.76295	PG	y		At the beginning and end of each term	At the beginning and end of each term	At the beginning and end of each term	At the beginning and end of each term
1.85456	PG	y	Female	I wouldn't agree to have any more swabs done	I wouldn't agree to have any more swabs done	I wouldn't agree to have any more swabs done	I wouldn't agree to have any more tests done
5.55876	PG	y	Female	I wouldn't agree to have any more swabs done	I wouldn't agree to have any more swabs done	At the beginning and end of each half-term	At the beginning and end of each half-term
3.69289	PG	y	Female	I wouldn't agree to have any more swabs done	I wouldn't agree to have any more swabs done	Twice a week	I wouldn't agree to have any more tests done
2.71662	PG	y	Female	At the beginning and end of each half-term	At the beginning and end of each half-term	At the beginning and end of each half-term	At the beginning and end of each term
7.5902	PG	y	Female	At the beginning and end of each term	At the beginning and end of each term	At the beginning and end of each term	At the beginning and end of each term	I would like to inform you that at beginning of * my daughter had cold with high fever and cough, runny nose for like 10 days but the fever not for long time just few days and she was fine
7.88929	PG	y	Male	I wouldn't agree to have any more swabs done	I wouldn't agree to have any more swabs done	I wouldn't agree to have any more swabs done	I wouldn't agree to have any more tests done
5.8262	Staff	y	Female	At the beginning and end of each term	At the beginning and end of each term	At the beginning and end of each term	At the beginning and end of each term
4.25126	PG	y	Male	At the beginning and end of each term	At the beginning and end of each term	At the beginning and end of each term	At the beginning and end of each term
4.96196	PG	y	Female	Once a month	Once a month	Once a month	Once a month
7.5684	PG	y	Female	Daily	Daily	Daily	The frequency of swabbing does not bother me
6.37599	PG	y	Female	Daily	Daily	Daily	The frequency of swabbing does not bother me
7.03709	PG	y		At the beginning and end of each half-term	At the beginning and end of each half-term	At the beginning and end of each half-term	At the beginning and end of each half-term
9.08729	PG		Female	The frequency of swabbing does not bother me	The frequency of swabbing does not bother me	The frequency of swabbing does not bother me	The frequency of swabbing does not bother me	I believe I had COVID-19 week beginning **/**/****. I believe * had COVID-19 **/**/****. No testing then so not proved. We both went into lockdown for three weeks.
6.58135	PG		Male	The frequency of swabbing does not bother me	The frequency of swabbing does not bother me	The frequency of swabbing does not bother me	The frequency of swabbing does not bother me	Thanks for sending application form.
1.34362	PG			Daily	Daily	Once a week	Daily
6.99431	PG		Female	Once a week	Once a week	Once a week		School last three weeks. Parental suppport needed for blood test and other samples
8.68055	Staff			Once a week	Once a week	Once a week	Once a week
4.62315	PG		Male	Once a week	The frequency of swabbing does not bother me	The frequency of swabbing does not bother me	The frequency of swabbing does not bother me
5.68778	PG		Male	The frequency of swabbing does not bother me	The frequency of swabbing does not bother me	The frequency of swabbing does not bother me	Once a week
0.766058	PG		Female	Once a week	Once a month	Once a month	Once a month
3.71319	Staff		Female
1.5829	PG			Once a week	Once a month	Once a week	Once a week
9.90598	PG		Male	Once a week
6.43199	PG		Female	Once a week	Once a week	Once a week	At the beginning and end of each half-term
9.84139	PG		Female
7.52155	PG
5.32265	Staff		Female	Once a week	Once a week	Once a week	Once a week
2.76311	Staff		Female	Once a week	Once a week	Once a week	Once a month
0.95106	Staff		Female		Once a week	The frequency of swabbing does not bother me	The frequency of swabbing does not bother me
8.34002	Staff		Female	Daily	Daily	Daily	I wouldn't agree to have any more tests done
5.10101	PG			Once a week	I wouldn't agree to have any more swabs done	I wouldn't agree to have any more swabs done	I wouldn't agree to have any more tests done
7.58369	PG		Male	Once a week	Once a week	Once a week	Once a week
0.0276844	PG		Male	Once a week	I wouldn't agree to have any more swabs done	Once a week	I wouldn't agree to have any more tests done
3.39475	PG		Male	Once a week	Once a week	Once a week	Once a week
4.46304	PG		Male	Once a week	Once a week	Once a month	Once a month
7.97302	PG			The frequency of swabbing does not bother me	The frequency of swabbing does not bother me	The frequency of swabbing does not bother me	Once a month
0.914667	PG		Female	Once a month	Once a month	I wouldn't agree to have any more swabs done	I wouldn't agree to have any more tests done
4.51231	PG		Male		Once a month		Once a month	5th child * 6th child * 7th chold * 8th child *
2.69359	PG		Male	Once a month	Once a month	Once a month	Once a month	Romanian
9.25597	PG		Female	Once a week	Once a week	Once a week	Once a week
3.61294	PG		Male	Once a week
5.84189	PG		Male	Once a week	I wouldn't agree to have any more swabs done	I wouldn't agree to have any more swabs done	I wouldn't agree to have any more tests done
0.524934	PG		Male	Once a week	Once a week	Once a week	Once a week
3.04884	PG		Male	Once a week
0.288876	PG		Female	Once a month	Once a month	Once a month	Once a month
8.8335	PG		Male	I wouldn't agree to have any more swabs done	I wouldn't agree to have any more swabs done	I wouldn't agree to have any more swabs done	I wouldn't agree to have any more tests done
7.67124	PG		Male	Daily	Daily	Daily	Once a month
1.64815	PG		Female	Once a month	Once a month	Once a week	I wouldn't agree to have any more tests done	Need more info for blood test
0.878937	PG		Female	Once a week	Once a week	Once a week	Once a week
8.58972	PG		Female	Once a week	Once a week	Once a week	I wouldn't agree to have any more tests done	No Blood tests
5.66312	Staff		Female	Once a week	Once a week	Once a week	Once a month
5.14166	PG		Male	Once a week	Once a week	Once a week	I wouldn't agree to have any more tests done	No Blood tests please
0.185428	PG		Male	Once a week	At the beginning and end of each half-term	At the beginning and end of each half-term	At the beginning and end of each half-term
8.76109	Staff		Female	Once a week	Once a week	Once a week	Once a week
0.24351	PG		Male	At the beginning and end of each half-term	At the beginning and end of each half-term	At the beginning and end of each half-term	I wouldn't agree to have any more tests done
5.61129	PG		Female	At the beginning and end of each term	At the beginning and end of each term	At the beginning and end of each term	At the beginning and end of each term
6.53242	PG		Female	At the beginning and end of each term	At the beginning and end of each term	At the beginning and end of each term	At the beginning and end of each term
9.00053	PG		Male	Once a week	Once a week	Once a week	Once a month
0.950746	PG		Female	Once a week	I wouldn't agree to have any more swabs done	Once a week	I wouldn't agree to have any more tests done
7.39531	PG		Female	Once a week				Questions 2-3-4 are not related with authorisation for the nose swab
2.17956	PG		Female	Twice a week	Twice a week	Twice a week	Once a month
3.89936	PG		Female	Once a month	I wouldn't agree to have any more swabs done	I wouldn't agree to have any more swabs done	I wouldn't agree to have any more tests done
8.7945	PG		Male	At the beginning and end of each half-term	At the beginning and end of each half-term	At the beginning and end of each half-term	At the beginning and end of each term
1.8557	PG		Male	Once a week	Once a week	Once a week	At the beginning and end of each half-term
0.73116	PG		Female	Twice a week	Twice a week	Twice a week	Once a month
8.49506	Staff		Male	Once a week	Once a week	Once a week	Once a week
3.57325	PG		Male	Once a week	I wouldn't agree to have any more swabs done	I wouldn't agree to have any more swabs done	I wouldn't agree to have any more tests done
8.17038	PG		Male	Once a month	I wouldn't agree to have any more swabs done	I wouldn't agree to have any more swabs done	I wouldn't agree to have any more tests done
1.54023	PG		Female	Once a week	At the beginning and end of each half-term	The frequency of swabbing does not bother me	I wouldn't agree to have any more tests done
9.61304	PG	y	Male
8.22409	PG	y	Male
7.49674	PG	y	Female
7.96934	PG	y	Female
1.72658	Staff	y
8.32509	Staff	y
4.16124	PG	y	Female
3.10087	PG	y	Male
8.34975	Staff	y	Male
5.40525	Staff	y	Male
6.13898	Staff	y	Female
9.32775	Staff	y
3.14243	PG	y	Female	Once a week	Once a month	Once a week	Once a month
2.01159	PG	y	Male					not in questionnaire
3.39631	PG	y	Female
0.781666	PG	y	Female
9.53835	PG	y	Male
5.41329	PG	y	Male
6.93003	PG	y	Female
5.58305	PG	y	Female	The frequency of swabbing does not bother me	The frequency of swabbing does not bother me	The frequency of swabbing does not bother me	The frequency of swabbing does not bother me	Patient White+Arab
3.40486	PG	y	Female	I wouldn't agree to have any more swabs done	I wouldn't agree to have any more swabs done	Once a month	Once a month
8.5221	PG	y	Male	The frequency of swabbing does not bother me	The frequency of swabbing does not bother me	The frequency of swabbing does not bother me	The frequency of swabbing does not bother me
1.063	Staff	y	Female	The frequency of swabbing does not bother me	The frequency of swabbing does not bother me	The frequency of swabbing does not bother me	The frequency of swabbing does not bother me
4.34641	PG	y	Female	Once a month	Once a month	The frequency of swabbing does not bother me	I wouldn't agree to have any more tests done
2.87726	Staff	y		Once a month	Once a month	Once a month	Once a month
5.26838	Staff	y	Female	The frequency of swabbing does not bother me	The frequency of swabbing does not bother me	The frequency of swabbing does not bother me	The frequency of swabbing does not bother me
6.1481	PG	y	Male	Daily	Daily	Daily	Once a week
0.973054	PG	y	Male	The frequency of swabbing does not bother me	The frequency of swabbing does not bother me	The frequency of swabbing does not bother me	Once a month
0.748707	PG	y	Female	The frequency of swabbing does not bother me	The frequency of swabbing does not bother me	The frequency of swabbing does not bother me	The frequency of swabbing does not bother me
7.94207	Staff	y	Female	The frequency of swabbing does not bother me	At the beginning and end of each half-term	At the beginning and end of each term	At the beginning and end of each half-term
3.60986	Staff	y	Male	Once a month	Once a month	Once a month	Once a month
4.49758	Staff	y	Female	At the beginning and end of each half-term	I wouldn't agree to have any more swabs done	The frequency of swabbing does not bother me	At the beginning and end of each half-term
8.47608	PG	y	Female	Once a week	Once a week	Once a week	Once a week
8.46167	Staff		Female	Once a week	I wouldn't agree to have any more swabs done	I wouldn't agree to have any more swabs done	I wouldn't agree to have any more tests done
2.83041	PG		Female	The frequency of swabbing does not bother me	The frequency of swabbing does not bother me	The frequency of swabbing does not bother me	The frequency of swabbing does not bother me	WHEN ANTIBODY TEST IS AVAILABLE
6.94569	PG		Female	Once a week	Once a week	Once a week	Once a month	Also ticked I wouldn't agree to have any more swabs done
7.86669	PG		Female	Once a week	I wouldn't agree to have any more swabs done	Once a week	I wouldn't agree to have any more tests done
9.07171	PG		Female	Daily	Daily	Daily	Once a week	Multiple symptoms on form - refer to form
8.21595	PG		Male	Once a week	Once a week	Once a week	I wouldn't agree to have any more tests done	Started back to school on **/**/****. Was off from school from **/**/****. No blood tests
2.66272	Staff		Female	The frequency of swabbing does not bother me	I wouldn't agree to have any more swabs done	The frequency of swabbing does not bother me	At the beginning and end of each term
5.70449	Staff		Male	Once a week	Once a week	Once a week	Once a week
6.51963	PG		Female	Once a week	Once a week	Once a week	At the beginning and end of each term
2.72916	Staff		Female	Once a week	Once a week	Once a week	Once a month
9.0891	PG		Female	The frequency of swabbing does not bother me	Twice a week	Daily	I wouldn't agree to have any more tests done	number of children in the household: 2 aged * and * (including *aela)
2.10759	Staff		Female	Once a week	Once a week	Once a week	Once a week
0.148613	PG		Male	Once a month	Once a month	Once a month	I wouldn't agree to have any more tests done
4.79218	PG		Female	Once a month	I wouldn't agree to have any more swabs done	Once a month	Once a month
6.3091	PG		Male	Twice a week
1.79602	PG		Male	The frequency of swabbing does not bother me	The frequency of swabbing does not bother me	The frequency of swabbing does not bother me	The frequency of swabbing does not bother me
9.6435	PG		Female				At the beginning and end of each half-term	Patient is not going to school at all. She starts from **/**/****. Family is **. Throat swab n saliva swab to be taken once a year
7.26451	PG		Female	Daily	Daily	Daily	Daily
8.42425	Staff		Female	Once a week	Once a week	Once a week	Once a week	Patient lives alone
8.47453	PG		Female	Once a week	Once a month	Twice a week	I wouldn't agree to have any more tests done
4.68026	PG		Female	Once a week	Once a month	Twice a week	I wouldn't agree to have any more tests done
3.13646	PG		Male	Once a week	I wouldn't agree to have any more swabs done	Once a week	I wouldn't agree to have any more tests done	Child did not attend school during lockdown
7.7595	PG		Male
3.99706	Staff		Female	Once a month	I wouldn't agree to have any more swabs done	Once a month	At the beginning and end of each term
5.91001	PG		Male	Once a week	Once a month	The frequency of swabbing does not bother me	At the beginning and end of each term
6.47867	PG		Female	Twice a week	Twice a week	Twice a week	Twice a week
4.10358	PG			Once a month	Once a month	Once a month	Once a month
0.221061	PG		Male	The frequency of swabbing does not bother me	The frequency of swabbing does not bother me	The frequency of swabbing does not bother me	I wouldn't agree to have any more tests done
2.13751	PG		Male	Once a week	Once a week	Once a week	Once a week
0.152003	PG		Female	The frequency of swabbing does not bother me	The frequency of swabbing does not bother me	The frequency of swabbing does not bother me	The frequency of swabbing does not bother me
1.31129	PG			The frequency of swabbing does not bother me	Once a week	The frequency of swabbing does not bother me	Once a month
2.09822	PG		Female	Once a week	Once a week	Once a week	At the beginning and end of each half-term
5.1596	PG		Female	Once a week	Once a week	Once a week	At the beginning and end of each half-term
3.35638	PG		Female	Once a month	Once a month	Once a month	I wouldn't agree to have any more tests done
9.72418	PG		Male	Once a month	Once a month	Once a month	I wouldn't agree to have any more tests done
5.86929	PG		Male	Once a week	Once a week	Twice a week	Once a month
1.23536	PG			Once a week	Once a week	Twice a week	Once a month
1.70236	PG		Female	The frequency of swabbing does not bother me	The frequency of swabbing does not bother me	The frequency of swabbing does not bother me	Once a week	Mother - White/English. Father Tunisian
1.66912	Staff		Male	Once a week	Once a week	Once a week	Once a week
1.41406	PG		Male	Once a week	Once a week	Once a week	At the beginning and end of each term
4.76122	PG		Male	Once a week	Once a week	Once a week	I wouldn't agree to have any more tests done	Child stopped showing seizure about 10 days after taking the medici ne & hasn't shown any since. He has been fully discharged from hospital about a year ago. Father is Japanese
8.96665	PG		Female	Once a week	Once a week	Once a week	At the beginning and end of each term
7.14914	PG		Female	Once a week	Once a week	Daily	Once a month
3.08424	Staff		Female	Once a week	Once a week	Once a week	Once a month
7.27819	PG		Male	At the beginning and end of each half-term	At the beginning and end of each half-term	At the beginning and end of each half-term	I wouldn't agree to have any more tests done
8.70153	PG		Male	Once a week	Once a month	Once a month	At the beginning and end of each half-term
7.35253	PG		Male	Once a week	I wouldn't agree to have any more swabs done	Once a week	I wouldn't agree to have any more tests done
6.67346	Staff		Female	Once a week	Once a week	Once a week	Once a week
6.15081	PG		Male	Once a week	At the beginning and end of each half-term	Once a month	At the beginning and end of each half-term
6.19866	PG		Male	Once a week	Once a week	Once a week	Once a week
1.13421	Staff		Female	Once a week	Once a week	Once a week	Once a week
4.50645	PG		Male	Once a week	Once a week	Once a week
6.23942	PG		Male	The frequency of swabbing does not bother me	The frequency of swabbing does not bother me	The frequency of swabbing does not bother me	I wouldn't agree to have any more tests done
2.34623	PG		Male	The frequency of swabbing does not bother me	I wouldn't agree to have any more swabs done	The frequency of swabbing does not bother me	I wouldn't agree to have any more tests done
7.25675	PG		Female	Once a month	I wouldn't agree to have any more swabs done	I wouldn't agree to have any more swabs done	I wouldn't agree to have any more tests done
2.28317	PG		Female	Once a week	I wouldn't agree to have any more swabs done	Once a month	I wouldn't agree to have any more tests done
3.60822	PG		Female
2.40088	PG		Male	The frequency of swabbing does not bother me	The frequency of swabbing does not bother me	The frequency of swabbing does not bother me	Once a month
9.92308	PG		Female	Once a week	The frequency of swabbing does not bother me	The frequency of swabbing does not bother me	The frequency of swabbing does not bother me
9.08957	PG		Female	Once a week	Once a week	Once a week	Once a week
5.54045	PG		Female	Once a week	The frequency of swabbing does not bother me	The frequency of swabbing does not bother me	The frequency of swabbing does not bother me
1.73155	PG		Female	Once a week	The frequency of swabbing does not bother me	The frequency of swabbing does not bother me	The frequency of swabbing does not bother me
6.07971	PG		Female	Once a week	Once a week	Once a week	I wouldn't agree to have any more tests done	Will withdraw if swabs upset * unnecessarily
0.533242	PG		Male	The frequency of swabbing does not bother me	The frequency of swabbing does not bother me	The frequency of swabbing does not bother me	The frequency of swabbing does not bother me
1.92303	PG		Male	Once a week	I wouldn't agree to have any more swabs done	I wouldn't agree to have any more swabs done	I wouldn't agree to have any more tests done
9.73195	PG		Female	Once a week	I wouldn't agree to have any more swabs done	I wouldn't agree to have any more swabs done	I wouldn't agree to have any more tests done
4.02589	PG		Male	Once a week	I wouldn't agree to have any more swabs done	I wouldn't agree to have any more swabs done	I wouldn't agree to have any more tests done
9.58515	Staff		Female	At the beginning and end of each term	I wouldn't agree to have any more swabs done	I wouldn't agree to have any more swabs done	I wouldn't agree to have any more tests done
1.56853	PG		Male	At the beginning and end of each term	I wouldn't agree to have any more swabs done	I wouldn't agree to have any more swabs done	I wouldn't agree to have any more tests done
0.0548585	PG		Male	The frequency of swabbing does not bother me	The frequency of swabbing does not bother me	The frequency of swabbing does not bother me	Once a month	(Q4) "But more/less frequent if * is not scared"
2.96456	Staff		Female	Daily	Daily	Daily	Once a month
3.24908	PG		Female	Once a week	Once a month	Once a month	At the beginning and end of each half-term
9.49574	PG		Male	Once a week	I wouldn't agree to have any more swabs done	Once a month	I wouldn't agree to have any more tests done
6.58133	PG		Female	Once a week	I wouldn't agree to have any more swabs done	Once a month	At the beginning and end of each term
4.71988	PG		Male	Once a week	Once a month	Once a week	I wouldn't agree to have any more tests done	I do not want blood tests taken of my child without my permission/presence.
4.73898	PG		Female	Twice a week	Twice a week	Twice a week	Once a month
0.2648	PG		Male	The frequency of swabbing does not bother me	The frequency of swabbing does not bother me	The frequency of swabbing does not bother me	Once a month	But if my son will be ok/not scared, more often than once a month
8.49634	Staff		Male	Once a week	Once a week	Once a week	Once a week
8.06089	PG		Female	Once a week	Once a month	Once a week	I wouldn't agree to have any more tests done	I do not want blood tests taken of my child without my presence/permission.
3.70079	Staff		Female	Once a week	Once a week	Once a week	Once a month
5.51589	PG		Female	At the beginning and end of each half-term	At the beginning and end of each half-term	Once a week	At the beginning and end of each term
2.67671	Staff	y	Male
1.35882	Staff	y	Female
9.17583	Staff	y	Female
9.86569	Staff	y	Male
3.27287	Staff	y	Female
5.32833	Staff	y	Female
7.71268	PG	y	Female
2.66573	Staff	y	Female
7.48943	Staff	y	Female					not in questionnaire
6.949	Staff	y	Female					not in questionnaire
4.29271	Staff	y	Female					not in questionnaire
7.46264	Staff	y	Female					not in questionnaire
2.53137	Staff	y	Female					not in questionnaire
5.9391	Staff	y	Male
6.94504	Staff	y	Male
8.84409	Staff	y
5.0993	PG	y	Male
6.43194	Staff	y
5.66866	Staff	y	Female
2.1964	Staff	y	Male
9.351	Staff	y
0.265224	Staff	y	Female
5.68174	Staff	y	Female
9.8119	Staff	y	Female
1.34002	Staff	y	Female
3.75668	Staff	y	Male
1.15533	PG	y	Female
0.473656	Staff	y	Female
4.70695	PG	y	Male					** spoke to mum (*) over the phone on **/**/**** at **:** and took verbal consent and signed on her behalf.
3.57014	PG	y	Male					** spoke to mum (*) over the phone on **/**/**** at **:** and took verbal consent and signed on her behalf.
6.57121	Staff	y	Female
1.12947	PG	y	Female
4.2949	PG	y	Female
4.30707	PG	y	Female
3.88872	Staff	y	Female
9.88842	Staff	y
4.70774	Staff	y	Female
2.09651	Staff	y	Female
4.14551	PG	y	Female					Telephone call to the mother ** at **:** on **/**/*** consent given to all items on the consent form.
3.73806	Staff	y	Female
1.34962	Staff	y	Female
0.554963	Staff	y	Female
9.26411	Staff	y	Female
5.5652	Staff	y	Female
6.94874	Staff	y	Female
0.0786004	Staff	y						not in questionnaire
2.68395	Staff	y
1.84594	Staff	y
6.96533	Staff	y
0.936072	Staff	y	Female
5.44286	PG	y	Female	At the beginning and end of each half-term	At the beginning and end of each half-term	Once a week	I wouldn't agree to have any more tests done
1.0284	PG	y	Female					not in questionnaire
6.25897	Staff	y
9.47988	Staff	y	Female
6.25704	PG	y	Male	At the beginning and end of each half-term	At the beginning and end of each half-term	At the beginning and end of each half-term	At the beginning and end of each half-term
0.14957	PG	y	Female
4.63829	Staff	y	Female
8.54089	Staff	y	Female
1.78835	Staff	y	Female					not in questionnaire
3.49285	Staff	y	Female
7.32575	Staff	y	Female
7.06608	Staff	y	Female
9.57715	Staff	y
4.45338	Staff	y	Female					not in questionnaire
1.73347	Staff	y	Female					not in questionnaire
5.49674	Staff	y	Female
9.40358	PG	y	Male
2.1995	PG	y	Male
0.188645	PG	y	Male
4.73973	PG	y	Male
7.3208	PG	y	Male
4.81734	Staff	y	Male
3.92928	Staff	y	Female
6.21138	Staff	y	Female
6.52571	Staff	y
3.48269	Staff	y	Female
9.98078	PG	y	Male
3.78746	Staff	y
3.60642	Staff	y
1.24855	PG	y	Male
1.47288	PG	y	Male
9.16362	Staff	y		Once a week	Once a week	Once a week	Once a month
2.67925	Staff	y
6.51276	PG	y	Female
9.73416	PG	y	Female
0.452194	PG	y	Female
4.66269	PG	y	Male
8.04698	Staff	y	Female
9.29625	PG	y	Female
3.64432	Staff	y
1.22312	PG	y	Female	At the beginning and end of each term	At the beginning and end of each term	At the beginning and end of each term	At the beginning and end of each term
0.646321	PG	y	Female
0.537702	Staff	y	Female
0.464462	PG	y	Female
5.61038	PG	y	Male
2.94681	Staff	y	Male
3.47885	PG	y	Male
2.26225	Staff	y
6.3355	PG	y	Male
7.74176	Staff	y	Male	The frequency of swabbing does not bother me	The frequency of swabbing does not bother me	The frequency of swabbing does not bother me	At the beginning and end of each half-term
1.56235	PG	y	Male	Once a week	Once a week	Once a week	Once a week
5.15471	Staff	y		Once a week	Once a week	Daily	Once a week
5.41445	Staff	y	Female	Once a week	Once a week	Once a week	Once a week
7.86225	PG	y		At the beginning and end of each half-term	At the beginning and end of each half-term	At the beginning and end of each half-term	At the beginning and end of each half-term
3.36309	Staff	y	Female	At the beginning and end of each half-term	At the beginning and end of each half-term	At the beginning and end of each half-term	At the beginning and end of each half-term
9.252	Staff	y	Female	Once a month	Once a month	Once a month	Once a month
1.91393	Staff	y	Female	Once a week	At the beginning and end of each half-term	Once a week	Once a month
0.653116	PG	y	Male	Once a month	Once a month	Once a month	Once a month
2.73505	Staff	y	Female	At the beginning and end of each term	At the beginning and end of each term	At the beginning and end of each term	At the beginning and end of each term
5.91977	PG	y	Male	Once a month	Once a month	Once a month	Once a month
2.20255	Staff	y
1.12443	PG	y	Female
2.3975	PG	y	Female
5.87714	PG	y	Male
8.97446	PG	y	Female
8.69518	PG	y	Male
1.47645	PG	y	Female
2.65187	PG	y	Female
2.43177	PG	y	Female
0.980165	PG	y	Male
2.88651	Staff	y
1.38999	Staff	y	Female	The frequency of swabbing does not bother me	The frequency of swabbing does not bother me	The frequency of swabbing does not bother me	The frequency of swabbing does not bother me
3.06682	Staff	y	Female	The frequency of swabbing does not bother me	The frequency of swabbing does not bother me	The frequency of swabbing does not bother me	At the beginning and end of each half-term
0.117851	Staff	y	Female	The frequency of swabbing does not bother me	The frequency of swabbing does not bother me	The frequency of swabbing does not bother me	At the beginning and end of each half-term
8.80906	PG	y	Male
1.42773	PG	y	Female
7.91482	PG	y
6.68981	PG	y	Male
7.41462	PG	y		The frequency of swabbing does not bother me	The frequency of swabbing does not bother me	The frequency of swabbing does not bother me	I wouldn't agree to have any more tests done
8.77493	Staff	y	Female
8.59817	PG	y		At the beginning and end of each term	Daily	Daily	Daily
0.342908	PG	y	Male	The frequency of swabbing does not bother me	The frequency of swabbing does not bother me	The frequency of swabbing does not bother me	The frequency of swabbing does not bother me
9.35674	PG	y	Female	The frequency of swabbing does not bother me	The frequency of swabbing does not bother me	The frequency of swabbing does not bother me	The frequency of swabbing does not bother me
1.89039	Staff	y		At the beginning and end of each half-term	At the beginning and end of each half-term	At the beginning and end of each half-term	At the beginning and end of each half-term
9.82523	PG	y						not answered
0.243654	PG	y						not answered
5.25258	PG	y	Male	Once a month	Once a month	Once a month	Once a month
6.33985	PG	y		Twice a week	Twice a week	Twice a week	Twice a week
2.23807	Staff	y		The frequency of swabbing does not bother me	The frequency of swabbing does not bother me	The frequency of swabbing does not bother me	The frequency of swabbing does not bother me
9.96901	PG	y		At the beginning and end of each term	At the beginning and end of each term	At the beginning and end of each term	At the beginning and end of each term	The best option for testing would be every 6 months
5.61081	PG	y	Female	The frequency of swabbing does not bother me	The frequency of swabbing does not bother me	The frequency of swabbing does not bother me	The frequency of swabbing does not bother me
8.85221	PG	y		I wouldn't agree to have any more swabs done	I wouldn't agree to have any more swabs done	At the beginning and end of each term	I wouldn't agree to have any more tests done
3.82786	PG	y		Once a month	Once a month	Once a month	At the beginning and end of each term
2.43258	Staff	y
8.32437	Staff	y		At the beginning and end of each half-term	At the beginning and end of each half-term	At the beginning and end of each half-term	At the beginning and end of each half-term
2.23712	Staff	y		At the beginning and end of each term	At the beginning and end of each term	At the beginning and end of each term	At the beginning and end of each term
6.54625	Staff	y		I wouldn't agree to have any more swabs done	I wouldn't agree to have any more swabs done	I wouldn't agree to have any more swabs done	I wouldn't agree to have any more tests done
2.98052	Staff	y		The frequency of swabbing does not bother me	The frequency of swabbing does not bother me	The frequency of swabbing does not bother me	The frequency of swabbing does not bother me
4.88558	Staff	y		Once a week	Once a week	Once a week	Once a week
0.34062	Staff	y		Once a month	Once a week	Once a week	Once a week
1.55044	PG	y		I wouldn't agree to have any more swabs done	I wouldn't agree to have any more swabs done	The frequency of swabbing does not bother me	I wouldn't agree to have any more tests done
1.19341	PG	y	Male	At the beginning and end of each half-term	At the beginning and end of each half-term	At the beginning and end of each half-term	At the beginning and end of each half-term
3.81443	Staff	y		At the beginning and end of each term	At the beginning and end of each term	At the beginning and end of each term	At the beginning and end of each term
0.806805	Staff	y	Female	I wouldn't agree to have any more swabs done	I wouldn't agree to have any more swabs done	I wouldn't agree to have any more swabs done	At the beginning and end of each term
8.14575	Staff	y		Once a week	Once a week	Once a week	Once a week
8.89852	PG	y	Male	At the beginning and end of each term	At the beginning and end of each term	At the beginning and end of each term	At the beginning and end of each term
1.37803	PG	y	Female	Once a month	Once a month	Once a month	I wouldn't agree to have any more tests done
8.63345	Staff	y		At the beginning and end of each term	At the beginning and end of each term	At the beginning and end of each term	At the beginning and end of each term
0.228757	PG	y	Male	Once a week	Once a week	Once a week	I wouldn't agree to have any more tests done
5.30536	PG	y	Male	Once a month	Once a month	Once a month	Once a month
5.4549	PG	y	Male	Once a week	At the beginning and end of each half-term	At the beginning and end of each half-term	At the beginning and end of each half-term
0.571484	Staff	y		At the beginning and end of each half-term	At the beginning and end of each half-term	At the beginning and end of each half-term	At the beginning and end of each half-term
7.59986	PG	y	Male	Once a week	Once a week	Once a week
4.07122	PG	y	Male	Once a week	I wouldn't agree to have any more swabs done	Once a week	I wouldn't agree to have any more tests done
7.83477	PG	y	Male	Once a week	Once a week	Once a week	Once a week
9.35296	PG	y	Male	At the beginning and end of each term	At the beginning and end of each term	At the beginning and end of each term	I wouldn't agree to have any more tests done
2.92328	PG	y	Female	Once a week	Once a week	Once a week	Once a week
6.70012	PG	y	Female	Once a week	Once a week	Once a week	Once a week
2.45022	PG	y	Female	Once a week	Once a week	Once a week	Once a month
1.97633	Staff	y	Female	The frequency of swabbing does not bother me	The frequency of swabbing does not bother me	The frequency of swabbing does not bother me	The frequency of swabbing does not bother me
1.14811	Staff	y	Female	The frequency of swabbing does not bother me	The frequency of swabbing does not bother me	The frequency of swabbing does not bother me	The frequency of swabbing does not bother me
8.44324	Staff	y	Female	The frequency of swabbing does not bother me	The frequency of swabbing does not bother me	The frequency of swabbing does not bother me	The frequency of swabbing does not bother me
4.98645	PG	y	Female	Once a month	Once a month	Once a month	Once a month
4.58182	PG	y	Female	Daily	Once a week	Daily	Once a month
8.59875	PG	y	Male	Once a week	Once a week	Once a week	Once a week
9.2197	PG	y	Male					I CANNOT ANSWER THE ABOVE * MIGHT BE TESTED WHEN NECESSARY WITH HIS CONSENT
0.501456	PG	y		Once a week	Once a week	Once a week	Once a month
2.367	Staff	y	Male	The frequency of swabbing does not bother me	The frequency of swabbing does not bother me	The frequency of swabbing does not bother me	The frequency of swabbing does not bother me
1.10377	Staff	y	Female	The frequency of swabbing does not bother me	The frequency of swabbing does not bother me	The frequency of swabbing does not bother me	The frequency of swabbing does not bother me
7.67617	PG	y	Male	At the beginning and end of each term	At the beginning and end of each term	At the beginning and end of each term	At the beginning and end of each term
6.66384	Staff	y	Female	At the beginning and end of each half-term	At the beginning and end of each half-term	At the beginning and end of each half-term	At the beginning and end of each half-term
2.89194	Staff	y	Female	At the beginning and end of each half-term	At the beginning and end of each half-term	At the beginning and end of each half-term	At the beginning and end of each half-term
4.23766	Staff	y	Female	The frequency of swabbing does not bother me	The frequency of swabbing does not bother me	The frequency of swabbing does not bother me	The frequency of swabbing does not bother me
5.14815	PG	y	Female	Once a week	Once a week	Once a month	Once a month
6.61241	Staff	y	Female	The frequency of swabbing does not bother me	The frequency of swabbing does not bother me	The frequency of swabbing does not bother me	The frequency of swabbing does not bother me
4.06533	Staff	y	Female	I wouldn't agree to have any more swabs done	I wouldn't agree to have any more swabs done	I wouldn't agree to have any more swabs done	At the beginning and end of each half-term
4.54761	PG	y	Male	Twice a week	Twice a week	Twice a week	I wouldn't agree to have any more tests done
9.78375	PG	y	Male	At the beginning and end of each half-term	At the beginning and end of each half-term	At the beginning and end of each half-term	At the beginning and end of each half-term
2.39384	PG	y	Female	The frequency of swabbing does not bother me	At the beginning and end of each half-term	The frequency of swabbing does not bother me	At the beginning and end of each half-term	* WOULD LIKE TO HAVE A STICKER AS AN AWARD AFTER THE TESTS
9.20672	Staff	y	Female	Twice a week	Once a week	Daily
3.62833	Staff	y	Female	At the beginning and end of each term	The frequency of swabbing does not bother me	The frequency of swabbing does not bother me	The frequency of swabbing does not bother me
1.73472	PG	y	Male	At the beginning and end of each half-term	At the beginning and end of each half-term	At the beginning and end of each half-term	At the beginning and end of each half-term
2.14634	Staff	y	Female
9.158	PG	y	Male	Once a month	Once a month	Once a month	Once a month
1.86326	PG	y	Female	At the beginning and end of each half-term	At the beginning and end of each half-term	At the beginning and end of each half-term	I wouldn't agree to have any more tests done
6.74392	PG	y	Female	The frequency of swabbing does not bother me	The frequency of swabbing does not bother me	The frequency of swabbing does not bother me	The frequency of swabbing does not bother me	PLEASE INFORM ME ABOUT THE RESULTS EVERY TIME THE CHILD IS TESTED
9.93381	PG	y	Male	Daily	Daily	Daily	Once a week
1.00896	Staff	y	Female	Once a week	Once a month	Once a month	Once a month
4.09399	Staff	y	Male	The frequency of swabbing does not bother me	The frequency of swabbing does not bother me	The frequency of swabbing does not bother me	The frequency of swabbing does not bother me
0.223368	PG	y	Female	Once a week	Once a week	Once a week	At the beginning and end of each half-term
7.19072	Staff	y	Female	I wouldn't agree to have any more swabs done	Once a month	At the beginning and end of each term	At the beginning and end of each term
0.691064	Staff	y	Female	At the beginning and end of each half-term	At the beginning and end of each half-term	At the beginning and end of each half-term	At the beginning and end of each half-term
7.33466	Staff	y		At the beginning and end of each half-term	At the beginning and end of each half-term	At the beginning and end of each half-term	At the beginning and end of each half-term
6.5043	PG	y	Male	Once a month	Once a month	Once a month	At the beginning and end of each half-term
2.67769	PG	y	Male	Once a month	Once a month	Once a month	Once a month
3.93223	PG	y	Male	The frequency of swabbing does not bother me	The frequency of swabbing does not bother me	The frequency of swabbing does not bother me	The frequency of swabbing does not bother me
4.6214	Staff	y	Female	The frequency of swabbing does not bother me	The frequency of swabbing does not bother me	At the beginning and end of each term	The frequency of swabbing does not bother me
2.86215	Staff	y	Female	At the beginning and end of each half-term	At the beginning and end of each half-term	At the beginning and end of each half-term	At the beginning and end of each half-term
2.50726	Staff	y		Twice a week	Twice a week	Twice a week	Twice a week
8.04634	Staff	y	Female	Once a month	Once a month	Once a month	At the beginning and end of each half-term
1.48591	PG	y	Female	At the beginning and end of each term	At the beginning and end of each term	At the beginning and end of each term	At the beginning and end of each term
8.69411	PG	y	Female	Once a month	Once a month	Once a month	At the beginning and end of each term
1.66364	PG	y	Female	At the beginning and end of each half-term	At the beginning and end of each half-term	At the beginning and end of each half-term	At the beginning and end of each term
4.68207	PG	y	Male	The frequency of swabbing does not bother me	The frequency of swabbing does not bother me	The frequency of swabbing does not bother me	Once a week
1.25413	Staff	y	Female
1.56172	Staff	y
7.21446	Staff		Female	Once a week	Once a week	Once a week	Once a week
2.33878	PG		Male	The frequency of swabbing does not bother me	The frequency of swabbing does not bother me	The frequency of swabbing does not bother me	The frequency of swabbing does not bother me
0.041819	Staff		Male	The frequency of swabbing does not bother me	The frequency of swabbing does not bother me	The frequency of swabbing does not bother me	The frequency of swabbing does not bother me
3.53024	PG		Female	Once a week	I wouldn't agree to have any more swabs done	Once a week	I wouldn't agree to have any more tests done	no blood test - child phobic of blood and needles
0.452062	Staff		Female	At the beginning and end of each term	At the beginning and end of each term	At the beginning and end of each half-term	At the beginning and end of each term
2.17942	PG		Male	Once a week	I wouldn't agree to have any more swabs done	Once a month	I wouldn't agree to have any more tests done	I do not wish for either my children to have blood tests done at school. The mouth and nose is enough!
5.28628	PG		Female	Once a week	I wouldn't agree to have any more swabs done	Once a month	I wouldn't agree to have any more tests done	I do not wish for either my children to have blood tests done at school. The mouth and nose is enough!
5.54941	PG		Female	Once a week	Once a week	Once a week
5.62728	PG		Male	Once a week	Once a week	Once a week	I wouldn't agree to have any more tests done
7.95136	PG		Female	Once a week	I wouldn't agree to have any more swabs done	I wouldn't agree to have any more swabs done	I wouldn't agree to have any more tests done
1.12415	PG		Female	Once a week	Once a week	Once a week	At the beginning and end of each half-term
1.27938	PG		Male	Once a week	Once a week	Once a week	Once a week
3.46743	PG		Male	Once a week	Once a week	Once a week	Once a week
9.16231	PG		Female	The frequency of swabbing does not bother me	The frequency of swabbing does not bother me	The frequency of swabbing does not bother me	I wouldn't agree to have any more tests done
5.73384	PG		Female	Daily	Daily	Daily	I wouldn't agree to have any more tests done	none of the family members (3 in total) have been tested for COVID-19 as tests not available at the time, however we all had symptomsand were self isolating. Then blood test for antibody for myself (mother) came. Test positive on the **/**/***
9.86636	PG		Female	The frequency of swabbing does not bother me	The frequency of swabbing does not bother me	The frequency of swabbing does not bother me	The frequency of swabbing does not bother me
6.56913	PG		Female	Once a month	Once a month	Once a week	I wouldn't agree to have any more tests done
0.184427	PG		Female
2.13129	PG		Female	Once a week	Once a week	Once a week	Once a month
1.81809	PG		Female	Once a week	Once a week	Once a week	I wouldn't agree to have any more tests done
4.30302	PG		Female	The frequency of swabbing does not bother me	Once a month	The frequency of swabbing does not bother me	At the beginning and end of each term
3.03554	PG		Female	The frequency of swabbing does not bother me	Once a month	The frequency of swabbing does not bother me	At the beginning and end of each term
8.79492	PG		Female	Once a week	I wouldn't agree to have any more swabs done	I wouldn't agree to have any more swabs done	I wouldn't agree to have any more tests done
4.51048	PG		Male	Once a week	Once a week	Once a week
2.37475	PG		Male	Once a week	I wouldn't agree to have any more swabs done	I wouldn't agree to have any more swabs done	I wouldn't agree to have any more tests done
4.62744	PG		Female	Once a week	I wouldn't agree to have any more swabs done	I wouldn't agree to have any more swabs done	I wouldn't agree to have any more tests done
3.18211	Staff		Female	Once a week	Once a month	Once a week	Once a week
7.0339	PG		Male	Twice a week	Once a week	Once a week	I wouldn't agree to have any more tests done	Blood test only if recommended by GP
0.0709987	PG		Male	Once a week	I wouldn't agree to have any more swabs done	Once a week	I wouldn't agree to have any more tests done	No blood test and Throat swab
7.50609	PG		Female	Once a week	At the beginning and end of each half-term	At the beginning and end of each half-term	At the beginning and end of each half-term
5.50303	PG		Male	Once a week	I wouldn't agree to have any more swabs done	I wouldn't agree to have any more swabs done	I wouldn't agree to have any more tests done
9.35651	PG		Female	Once a week	I wouldn't agree to have any more swabs done	Once a week	I wouldn't agree to have any more tests done
5.94663	PG		Female					not answered
1.39227	PG		Male	Once a week
9.8903	PG		Male	The frequency of swabbing does not bother me	I wouldn't agree to have any more swabs done	The frequency of swabbing does not bother me	I wouldn't agree to have any more tests done
2.19385	PG		Female	Once a week	Once a week	Daily	At the beginning and end of each term
2.92231	PG		Male	Once a week	Once a week	Once a week
4.24092	PG		Male	Once a week	Once a week	Once a week
8.90233	PG		Male	Once a week	Once a week	Once a week	Once a week
5.08329	Staff			Once a week	Once a week	Once a week	Once a week
6.03896	Staff			Daily	Daily	Daily	Twice a week
2.11208	Staff		Female
2.64565	Staff		Male	Daily	Once a week	Once a week	Once a week
7.32031	PG		Male	Once a week	Once a week	Once a week	Once a month
4.50626	PG		Male	Once a week	Once a week	Once a week	Once a week
1.24789	PG		Male	Once a week	I wouldn't agree to have any more swabs done	Once a week	At the beginning and end of each term
0.487898	Staff		Female	Once a week	Once a week	Once a week	Once a week
5.82814	Staff		Female	The frequency of swabbing does not bother me	The frequency of swabbing does not bother me	The frequency of swabbing does not bother me	The frequency of swabbing does not bother me
9.49601	PG		Female	Once a week	Once a week	Once a week	Once a week
6.09689	PG		Female	Daily	Daily	Daily	Once a week
5.18264	PG		Female	Once a week	Once a week	Once a week	Once a month
4.9401	PG		Male	Once a week		Once a week		unsure about blood & throat swab as alex is only 5 and doesn’t like dentist or needles.
1.37044	PG		Female	I wouldn't agree to have any more swabs done	I wouldn't agree to have any more swabs done	I wouldn't agree to have any more swabs done	I wouldn't agree to have any more tests done
3.56088	Staff		Female	The frequency of swabbing does not bother me	The frequency of swabbing does not bother me	The frequency of swabbing does not bother me	The frequency of swabbing does not bother me
0.48589	PG		Male	Daily	Daily	Daily	Daily
6.57284	PG		Female	Once a week		Once a week	I wouldn't agree to have any more tests done
2.90883	PG		Female	Once a week	Once a week	Once a week	Once a month
7.39913	PG		Male	Daily	Daily	Daily	Once a month
8.65727	PG		Female	Once a week	Once a week	Once a week	At the beginning and end of each half-term
3.88791	PG		Male	Once a week	Once a week	Once a week	At the beginning and end of each term
7.29964	Staff		Female	Once a week	Once a week	Once a week	Once a week
3.44361	PG		Male
1.72486	PG		Female	I wouldn't agree to have any more swabs done	I wouldn't agree to have any more swabs done	I wouldn't agree to have any more swabs done	Once a week
8.1562	PG		Male
5.00036	Staff		Female	Daily	Daily	Daily	Once a month
3.26813	PG		Male	Once a month	The frequency of swabbing does not bother me	The frequency of swabbing does not bother me	Once a month
8.05088	PG		Male	Once a week	I wouldn't agree to have any more swabs done	I wouldn't agree to have any more swabs done	I wouldn't agree to have any more tests done
0.106151	PG		Female	Once a month	Once a month	Once a month	At the beginning and end of each half-term
6.10037	PG		Female	Once a week	At the beginning and end of each term	At the beginning and end of each term	At the beginning and end of each term
8.52754	PG		Male	Once a week	Once a week	The frequency of swabbing does not bother me	The frequency of swabbing does not bother me
1.49056	Staff		Female	The frequency of swabbing does not bother me	The frequency of swabbing does not bother me	The frequency of swabbing does not bother me	The frequency of swabbing does not bother me
1.77326	Staff		Female	Once a week	I wouldn't agree to have any more swabs done	I wouldn't agree to have any more swabs done	I wouldn't agree to have any more tests done
7.31337	Staff			Once a week	Once a week	Once a week	At the beginning and end of each term
2.87307	Staff		Female	Once a week				Staff is Romanian
6.48232	PG		Male	At the beginning and end of each term	At the beginning and end of each term	At the beginning and end of each term	At the beginning and end of each term
7.00397	PG		Male	Once a week	I wouldn't agree to have any more swabs done	I wouldn't agree to have any more swabs done	I wouldn't agree to have any more tests done
3.4857	PG		Female	Once a week	At the beginning and end of each half-term	At the beginning and end of each term	At the beginning and end of each half-term
5.36981	PG		Male	Once a week
0.147503	PG		Male	Once a week	Once a week	Once a week	I wouldn't agree to have any more tests done
7.22916	PG		Male	Once a week	At the beginning and end of each term	At the beginning and end of each half-term	At the beginning and end of each term	Family Romanian. Father's name and son's name is same
2.29818	PG		Male	The frequency of swabbing does not bother me	The frequency of swabbing does not bother me	The frequency of swabbing does not bother me	At the beginning and end of each half-term
6.1047	PG		Female	Once a month	I wouldn't agree to have any more swabs done	Once a month	I wouldn't agree to have any more tests done
6.57044	PG		Female	Once a week				Pt is European
1.07001	PG		Male	Once a week	At the beginning and end of each half-term	Once a week	At the beginning and end of each half-term
7.97899	Staff		Female	The frequency of swabbing does not bother me	The frequency of swabbing does not bother me	The frequency of swabbing does not bother me	Once a month
9.94139	PG		Female	Twice a week	I wouldn't agree to have any more swabs done	I wouldn't agree to have any more swabs done	I wouldn't agree to have any more tests done
6.10082	PG		Male	Once a month			Once a month
0.463301	PG		Female	Once a week	At the beginning and end of each half-term	At the beginning and end of each half-term	At the beginning and end of each term	Family is Romanian
6.88884	PG		Male					Romanian family
3.28196	Staff		Female	Once a month	Once a month	Once a month	At the beginning and end of each half-term
2.68405	PG		Female	Once a week	At the beginning and end of each term	At the beginning and end of each half-term	At the beginning and end of each term
3.92136	PG		Male	Once a week				Balance options not ticked
0.745227	PG		Female	Once a month	Once a month	Once a month	At the beginning and end of each term
5.75081	PG		Male	Once a week	Once a week	Once a week	At the beginning and end of each half-term
4.63104	Staff		Female	The frequency of swabbing does not bother me	Once a month	Once a month	Once a month
7.59714	PG		Female	Once a week	At the beginning and end of each half-term	At the beginning and end of each half-term	At the beginning and end of each half-term
5.6759	PG		Male	Once a week	At the beginning and end of each half-term	At the beginning and end of each half-term	At the beginning and end of each half-term	Parents job and ages of children not provided
2.06523	PG		Female	Once a week	The frequency of swabbing does not bother me	The frequency of swabbing does not bother me	The frequency of swabbing does not bother me
6.29893	PG		Male	Once a week	Once a week	Once a week	I wouldn't agree to have any more tests done
2.05928	PG		Male	Once a week	The frequency of swabbing does not bother me	The frequency of swabbing does not bother me	The frequency of swabbing does not bother me
0.835085	PG		Female	Once a week
3.49439	PG		Female	Once a week	Once a week	Once a week	At the beginning and end of each term
4.81228	PG		Female	Once a week	I wouldn't agree to have any more swabs done	I wouldn't agree to have any more swabs done	I wouldn't agree to have any more tests done
8.49702	PG		Female
5.11397	Staff		Female	The frequency of swabbing does not bother me	Once a week	The frequency of swabbing does not bother me	Once a month
7.5734	PG		Male	Once a week				Family is Romanian
3.59902	PG		Female	Once a week				Family is Romanian
4.10462	Staff		Female	Once a week	The frequency of swabbing does not bother me	The frequency of swabbing does not bother me	The frequency of swabbing does not bother me
3.97875	PG			Once a week	I wouldn't agree to have any more swabs done	Once a week	I wouldn't agree to have any more tests done	During lockdown pt did not go to school
6.26037	PG		Female	Once a week	Once a week	Once a week	Once a month
8.82629	PG		Female	Once a week				No further options selected
8.81627	PG		Female	Once a month	Once a month	Once a month	I wouldn't agree to have any more tests done
2.13399	PG		Male	Once a week	Once a week	Once a week	Once a month	Catholic Greek Orthodox. * suffers from nose bleeds but they have become less frequent. * has Autism so just needs plenty of reassurance what's going to happen before the swab test
1.48848	PG		Male	Once a week	At the beginning and end of each half-term	At the beginning and end of each half-term	At the beginning and end of each half-term
9.60512	Staff		Female	Once a week	I wouldn't agree to have any more swabs done	Once a week	I wouldn't agree to have any more tests done
4.70822	PG		Male	Once a week	At the beginning and end of each half-term	At the beginning and end of each half-term	At the beginning and end of each half-term
2.9416	PG		Female	Once a week	I wouldn't agree to have any more swabs done	I wouldn't agree to have any more swabs done	I wouldn't agree to have any more tests done
1.06109	PG		Female	Once a month	Once a month	At the beginning and end of each term	I wouldn't agree to have any more tests done
3.42603	PG		Male	Once a week	Once a week	I wouldn't agree to have any more swabs done	I wouldn't agree to have any more tests done
6.16507	PG		Female	At the beginning and end of each term	I wouldn't agree to have any more swabs done	I wouldn't agree to have any more swabs done	I wouldn't agree to have any more tests done	I heard that nose swab is unpleasant so if any of my kids will complain about it I DON'T want them to have anymore!
8.97395	PG		Male	Once a week	Once a week	Once a week	Once a week
9.20765	PG		Male	Once a week	I wouldn't agree to have any more swabs done	I wouldn't agree to have any more swabs done	I wouldn't agree to have any more tests done
7.42328	PG		Male	At the beginning and end of each term	I wouldn't agree to have any more swabs done	I wouldn't agree to have any more swabs done	I wouldn't agree to have any more tests done	I head that nose swab is really unpleasant so if my kids will be unhappy after first one I DON’T want them to have anymore!
8.48402	PG		Male	Once a week	Once a month	Once a month	I wouldn't agree to have any more tests done
4.12282	PG		Female	Once a week	Once a week	Once a week
3.82439	PG		Male	Once a week	Once a week	Once a week	I wouldn't agree to have any more tests done
8.0059	PG		Male	Once a week	Once a week	I wouldn't agree to have any more swabs done	I wouldn't agree to have any more tests done
7.12754	PG		Female	Once a month	Once a month	Once a month	Once a month
2.4665	PG		Female	Once a week	I wouldn't agree to have any more swabs done	I wouldn't agree to have any more swabs done	I wouldn't agree to have any more tests done
5.26495	Staff		Female	The frequency of swabbing does not bother me	The frequency of swabbing does not bother me	The frequency of swabbing does not bother me	The frequency of swabbing does not bother me
8.17302	Staff		Male
9.42366	Staff		Female	At the beginning and end of each half-term	At the beginning and end of each half-term	At the beginning and end of each half-term	At the beginning and end of each half-term
4.37785	Staff		Female
6.2861	PG		Male	Once a week	I wouldn't agree to have any more swabs done	I wouldn't agree to have any more swabs done	I wouldn't agree to have any more tests done
9.18919	PG		Male	Once a week	Once a week	Once a week	Once a week
3.66318	Staff		Male	Daily	Daily	Daily	Once a month
2.45246	PG		Female	Once a week	I wouldn't agree to have any more swabs done	Once a week	At the beginning and end of each term	At the time of my child showing symptoms of Covid 19 Mum developed symptoms which included very high fever, which lasted 3 weeks. No tests were available at the time (from **/**/***)
0.608103	PG		Female	Once a month	I wouldn't agree to have any more swabs done	Once a month	I wouldn't agree to have any more tests done
1.9449	PG		Female	Twice a week	Once a week	Once a week	Once a week
2.1277	PG		Female	Once a week	Once a month	Once a week	At the beginning and end of each half-term
8.58844	PG		Female	At the beginning and end of each half-term	I wouldn't agree to have any more swabs done	At the beginning and end of each half-term	I wouldn't agree to have any more tests done
0.840034	PG		Male	Once a week	Once a month	Once a month	Once a month
5.39534	PG		Female	Once a week	I wouldn't agree to have any more swabs done	Once a month	At the beginning and end of each term	Child 2 age 8 weeks
0.272178	Staff		Female	The frequency of swabbing does not bother me	The frequency of swabbing does not bother me	The frequency of swabbing does not bother me	The frequency of swabbing does not bother me
8.08653	PG		Female	Once a week	I wouldn't agree to have any more swabs done	I wouldn't agree to have any more swabs done	I wouldn't agree to have any more tests done
6.99991	PG		Male	Once a week	I wouldn't agree to have any more swabs done	Once a week	I wouldn't agree to have any more tests done
0.941115	PG		Male	Once a week	I wouldn't agree to have any more swabs done	I wouldn't agree to have any more swabs done	I wouldn't agree to have any more tests done
2.48731	PG		Male	Once a week	Once a week	Once a week
7.74038	PG		Male	Twice a week	Twice a week	Twice a week	At the beginning and end of each half-term
2.2123	PG		Female		I wouldn't agree to have any more swabs done	I wouldn't agree to have any more swabs done	I wouldn't agree to have any more tests done	Nose swab option not ticked
4.6536	PG		Male	The frequency of swabbing does not bother me	Once a week	The frequency of swabbing does not bother me	At the beginning and end of each half-term
2.51816	PG		Male	The frequency of swabbing does not bother me	The frequency of swabbing does not bother me	The frequency of swabbing does not bother me	The frequency of swabbing does not bother me
6.13546	PG		Male	Once a week	Once a week	Once a month	Once a month
1.97732	Staff		Female	The frequency of swabbing does not bother me	The frequency of swabbing does not bother me	The frequency of swabbing does not bother me	The frequency of swabbing does not bother me
3.27811	PG		Male	Once a week
9.99493	PG		Female	Once a week	I wouldn't agree to have any more swabs done	I wouldn't agree to have any more swabs done	I wouldn't agree to have any more tests done
8.02375	PG		Male	Daily	Daily	Daily	At the beginning and end of each term
3.63277	PG		Female	Once a week	Once a week	Once a week	I wouldn't agree to have any more tests done
3.86634	PG		Male	Once a week	Once a week	Once a week	Once a week	Locaation of working may change in July
1.36829	PG		Male	Daily	Daily	Daily	Daily
6.98381	PG		Male	Daily	Daily	Daily	Once a week
9.39667	PG		Female	The frequency of swabbing does not bother me	The frequency of swabbing does not bother me	The frequency of swabbing does not bother me	I wouldn't agree to have any more tests done
6.36316	PG		Male	The frequency of swabbing does not bother me	The frequency of swabbing does not bother me	The frequency of swabbing does not bother me	The frequency of swabbing does not bother me
3.00529	Staff			Once a week	Once a week	Once a week	I wouldn't agree to have any more tests done
8.538	PG		Male	Once a week	Daily	Daily	Once a week
0.634404	Staff		Female	The frequency of swabbing does not bother me	The frequency of swabbing does not bother me	The frequency of swabbing does not bother me	Daily
4.39324	Staff			Once a week	I wouldn't agree to have any more swabs done	I wouldn't agree to have any more swabs done	I wouldn't agree to have any more tests done
3.63193	Staff		Female	Once a week	Once a week	Once a week	Once a month
1.29744	PG		Female
5.03336	PG		Female	The frequency of swabbing does not bother me	The frequency of swabbing does not bother me	The frequency of swabbing does not bother me	Once a month
6.22398	PG		Female
9.21391	PG		Female	Daily	Daily	Daily	Daily
2.50566	Staff		Female	Once a week	Once a week	Once a week	I wouldn't agree to have any more tests done
5.20709	PG		Male			Once a week
8.67864	Staff		Female	Once a week	Once a week	Once a week	Once a month
9.73165	Staff		Female	Twice a week	Twice a week	Twice a week	Once a month
8.81308	PG		Female	Once a week	Once a week	Daily	Once a month
1.26773	PG		Male	Twice a week	Twice a week	Twice a week	Once a month
1.30538	PG		Male	The frequency of swabbing does not bother me	The frequency of swabbing does not bother me	The frequency of swabbing does not bother me	The frequency of swabbing does not bother me
3.65604	PG		Male	The frequency of swabbing does not bother me	The frequency of swabbing does not bother me	The frequency of swabbing does not bother me	The frequency of swabbing does not bother me
4.94356	PG			Once a week	Once a week	Once a week	Once a week
2.75118	PG		Female	Once a week	Once a week	Once a week	I wouldn't agree to have any more tests done
3.27201	PG		Male	Once a week	Once a week	Once a week	I wouldn't agree to have any more tests done
5.43157	PG		Male	Once a week	Once a week	Once a week	Once a month
6.09036	PG		Female	Once a week	Once a week	I wouldn't agree to have any more swabs done	I wouldn't agree to have any more tests done
1.6408	PG		Female	Once a week	Once a week	I wouldn't agree to have any more swabs done	I wouldn't agree to have any more tests done
7.5721	PG		Male	Once a week	Once a week	Twice a week	At the beginning and end of each term
4.27922	PG			Once a week	Once a week	Once a week	I wouldn't agree to have any more tests done
0.548963	PG		Male	Once a week	Once a month	I wouldn't agree to have any more swabs done	At the beginning and end of each term
5.10434	PG		Female	Once a week	Once a week	Once a week	Once a month
5.81056	PG		Male	Once a week	I wouldn't agree to have any more swabs done	I wouldn't agree to have any more swabs done	I wouldn't agree to have any more tests done
1.79054	PG		Male	Once a week	Once a week	Once a week	I wouldn't agree to have any more tests done
1.48236	PG		Male	Twice a week	Twice a week	Twice a week	Twice a week
2.41093	PG		Male	Once a week	I wouldn't agree to have any more swabs done	I wouldn't agree to have any more swabs done	I wouldn't agree to have any more tests done
7.26993	PG		Male	Once a week	Once a week	Once a week	Once a week
5.2259	PG		Male	I wouldn't agree to have any more swabs done	I wouldn't agree to have any more swabs done	I wouldn't agree to have any more swabs done	I wouldn't agree to have any more tests done
6.69393	PG		Female	Once a month	Once a month	I wouldn't agree to have any more swabs done	I wouldn't agree to have any more tests done
0.0662816	Staff		Female	I wouldn't agree to have any more swabs done	I wouldn't agree to have any more swabs done	Daily	Daily
3.78115	Staff		Female	Once a month	Once a month	Once a month	Once a month
9.2818	Staff		Female	Once a week	Once a week	Once a week	Once a month
0.90253	Staff		Female	Once a week	Once a week	Once a week	Once a week
4.1522	Staff		Female	The frequency of swabbing does not bother me	The frequency of swabbing does not bother me	The frequency of swabbing does not bother me	The frequency of swabbing does not bother me
0.375101	Staff		Female	Once a week	Once a week	Once a week	Once a week
1.53279	Staff		Male	Once a week
8.4269	Staff		Female
8.35773	PG		Female	Once a week	Once a week	Once a week	I wouldn't agree to have any more tests done
5.85221	Staff		Male	Daily	Twice a week	Daily	Once a week
8.10259	PG		Female	Once a week	I wouldn't agree to have any more swabs done	Once a week	Once a month
5.04743	PG		Female	Once a week	I wouldn't agree to have any more swabs done	I wouldn't agree to have any more swabs done	At the beginning and end of each term
9.9292	Staff		Female	Once a week	Once a month	Once a week	Once a month
5.34404	Staff		Female	Once a week	Once a week	Once a week	Once a month
7.44489	PG		Female	Once a week	Once a week	Once a week	Once a week
5.31807	PG		Male	Once a week	I wouldn't agree to have any more swabs done	I wouldn't agree to have any more swabs done	The frequency of swabbing does not bother me
0.869471	PG		Male	The frequency of swabbing does not bother me	The frequency of swabbing does not bother me	The frequency of swabbing does not bother me	I wouldn't agree to have any more tests done
5.34333	PG		Female	Once a week	I wouldn't agree to have any more swabs done	I wouldn't agree to have any more swabs done	I wouldn't agree to have any more tests done
7.97144	PG		Female	Once a month	At the beginning and end of each term	Once a month	I wouldn't agree to have any more tests done
5.24652	PG		Female	Once a week	At the beginning and end of each half-term	Once a week	I wouldn't agree to have any more tests done
6.83019	PG		Female	Once a week	Once a week	Once a week	Once a week
5.92622	PG		Male	Once a week	Once a week	Once a week	I wouldn't agree to have any more tests done
0.431283	PG		Male	The frequency of swabbing does not bother me	The frequency of swabbing does not bother me	The frequency of swabbing does not bother me	Once a week
2.13471	PG		Male	Once a month	Once a month	Once a month	I wouldn't agree to have any more tests done
6.56231	PG		Female	Once a week	I wouldn't agree to have any more swabs done	I wouldn't agree to have any more swabs done	I wouldn't agree to have any more tests done
8.67952	PG		Male	Once a week	I wouldn't agree to have any more swabs done	I wouldn't agree to have any more swabs done	I wouldn't agree to have any more tests done
4.28473	PG		Male	Once a week	Once a week	Once a week	At the beginning and end of each term
2.07629	PG		Female	Once a week	I wouldn't agree to have any more swabs done	I wouldn't agree to have any more swabs done	I wouldn't agree to have any more tests done
3.30263	PG		Male	Once a week	I wouldn't agree to have any more swabs done	Once a week	I wouldn't agree to have any more tests done
2.10728	PG			Once a week	Once a week
6.20366	PG		Male
2.35655	PG		Female	Once a week	Once a week	Once a week	At the beginning and end of each half-term
9.54103	PG		Female	Once a week	Once a week	Once a week	Once a week
3.5124	PG		Male	Once a week	I wouldn't agree to have any more swabs done	I wouldn't agree to have any more swabs done	Once a month
4.15632	PG		Male	Once a week	I wouldn't agree to have any more swabs done	Once a week	I wouldn't agree to have any more tests done
7.88683	PG		Male	Daily	Daily	Daily	Once a month
0.812225	PG		Female	Daily	Daily	Daily	Once a month
1.03069	Staff		Female	Daily	Daily	Daily	Once a month
8.18651	PG		Female	Once a week	Once a week	Once a week	Once a month
1.79185	PG		Female	Once a week	Once a week	Once a week
2.78536	PG		Female	Once a week	Once a week	Once a week	Once a week
7.16781	PG		Male	At the beginning and end of each half-term	At the beginning and end of each half-term	At the beginning and end of each half-term	At the beginning and end of each term
5.12941	PG		Male	I wouldn't agree to have any more swabs done	I wouldn't agree to have any more swabs done	Once a month	I wouldn't agree to have any more tests done
7.61545	Staff		Male	Once a week	Once a week	Once a week	Once a week
8.09313	Staff		Male	Once a week	Once a week	Once a week	Once a month
6.57881	Staff		Male	Once a month	Once a month	Once a week	I wouldn't agree to have any more tests done
6.58157	Staff		Female	The frequency of swabbing does not bother me	The frequency of swabbing does not bother me	The frequency of swabbing does not bother me	The frequency of swabbing does not bother me
6.04774	Staff		Female	I wouldn't agree to have any more swabs done	I wouldn't agree to have any more swabs done	I wouldn't agree to have any more swabs done	I wouldn't agree to have any more tests done	kind and understanding staff
6.15531	Staff		Female	Once a week	Once a week	Once a week	Once a week
1.28558	Staff		Female	Once a week	Once a month	Once a month	Once a month
1.35661	PG		Male	Once a week	Twice a week	Once a week		I do not agrre for my child to have any blood test
8.85555	PG		11/09/2014	Once a week	Once a week	Once a week	The frequency of swabbing does not bother me
3.56323	PG		Female	Once a week	Once a week	Once a week	I wouldn't agree to have any more tests done	I would agree to a single blood test for antibody testinting only
4.04701	Staff		Female	The frequency of swabbing does not bother me	The frequency of swabbing does not bother me	The frequency of swabbing does not bother me	I wouldn't agree to have any more tests done
6.59944	Staff		Female	Once a week	The frequency of swabbing does not bother me	The frequency of swabbing does not bother me	The frequency of swabbing does not bother me
3.25174	PG		Male	Once a week	Once a week	Once a week	Once a month
7.67464	PG		Female	Once a month	Once a month	At the beginning and end of each term	I wouldn't agree to have any more tests done
9.57922	PG		Male	The frequency of swabbing does not bother me	At the beginning and end of each half-term	The frequency of swabbing does not bother me	I wouldn't agree to have any more tests done
6.79688	PG		Female	Once a week	Once a week	Once a week	I wouldn't agree to have any more tests done
2.06406	Staff		Male	Daily	The frequency of swabbing does not bother me	Daily	Once a week
8.58202	PG		Male	Once a week	I wouldn't agree to have any more swabs done	I wouldn't agree to have any more swabs done	I wouldn't agree to have any more tests done
7.17157	PG		Male	Once a week	I wouldn't agree to have any more swabs done	I wouldn't agree to have any more swabs done	I wouldn't agree to have any more tests done
9.75679	PG		Male	Once a week
3.78869	PG		Male	Once a week				I only agree to * having one nose swab a week, but I withdraw my agreement if it upsets * in anyway.
7.74725	PG		Female	The frequency of swabbing does not bother me	The frequency of swabbing does not bother me	The frequency of swabbing does not bother me	Once a month	Advice needed (prior test) where needle is inserted in finger? Or vein?
5.03101	PG		Male	Daily	Twice a week	Daily	Once a week
8.56118	PG		Male	Once a week	Once a week	Once a week	I wouldn't agree to have any more tests done	As saliva, throat and nose swabs are available we do not consider relevant to have a blood test
3.11284	PG	y	Male					not in questionnaire
9.07297	PG	y	Female					not in questionnaire
1.61128	Staff	y						not in questionnaire
1.33184	PG	y	Male	At the beginning and end of each half-term	At the beginning and end of each half-term	At the beginning and end of each half-term	At the beginning and end of each half-term
7.60477	Staff	y		Once a week	Once a week	Once a week	I wouldn't agree to have any more tests done
2.22903	Staff	y		The frequency of swabbing does not bother me	The frequency of swabbing does not bother me	The frequency of swabbing does not bother me	The frequency of swabbing does not bother me
4.35589	Staff	y
2.14475	PG	y	Male
4.3351	PG	y	Male	The frequency of swabbing does not bother me	The frequency of swabbing does not bother me	The frequency of swabbing does not bother me	At the beginning and end of each half-term
6.57843	Staff	y	Female	Daily	Daily	Once a month	Once a month
7.20236	Staff	y		Once a month	Once a month	Once a month	At the beginning and end of each half-term
0.586969	PG	y	Female	At the beginning and end of each half-term	The frequency of swabbing does not bother me	The frequency of swabbing does not bother me	At the beginning and end of each half-term
0.994737	PG	y		Daily	Daily	Once a month	Once a month
3.16852	Staff	y		I wouldn't agree to have any more swabs done	I wouldn't agree to have any more swabs done	I wouldn't agree to have any more swabs done	I wouldn't agree to have any more tests done
5.32617	PG	y	Female	Once a week	Once a month	Daily	Once a month
2.94299	PG	y	Male	I wouldn't agree to have any more swabs done	I wouldn't agree to have any more swabs done	I wouldn't agree to have any more swabs done	I wouldn't agree to have any more tests done
7.16264	PG	y	Male	I wouldn't agree to have any more swabs done	I wouldn't agree to have any more swabs done	I wouldn't agree to have any more swabs done	I wouldn't agree to have any more tests done
5.13983	PG	y	Male	Daily	Twice a week	Twice a week	Once a week
8.6862	Staff	y		The frequency of swabbing does not bother me	The frequency of swabbing does not bother me	The frequency of swabbing does not bother me	The frequency of swabbing does not bother me
3.57403	PG	y		Once a month	Once a month	Once a month	Once a month
2.3414	PG	y	Female	Once a month	Once a month	Once a week	I wouldn't agree to have any more tests done
5.36195	PG	y	Female	Once a month	I wouldn't agree to have any more swabs done	Once a week	I wouldn't agree to have any more tests done
6.50803	PG	y	Female	Once a week	Once a week	Once a week	Once a month
2.03418	PG	y	Male	Once a week	Once a week	Once a week	Once a month
4.00852	PG	y	Male	Once a week	Once a week	Once a week	Once a month
5.48301	PG	y	Male	At the beginning and end of each half-term	At the beginning and end of each half-term	At the beginning and end of each half-term	At the beginning and end of each half-term
6.41536	PG	y	Male	The frequency of swabbing does not bother me	The frequency of swabbing does not bother me	The frequency of swabbing does not bother me	The frequency of swabbing does not bother me
9.05873	PG	y	Female		Once a week	Once a week	Once a month	MY FAMILY HAD COVID19 AND DIAGNOSED BY GP ME AND MY WIFE HAD SYMPTOMS BUT NOT TESTED
1.71265	PG	y	Male	The frequency of swabbing does not bother me	The frequency of swabbing does not bother me	The frequency of swabbing does not bother me	At the beginning and end of each term	answers to feasibility questions - only if my son consents. He had conjunctivitis - quite mild - caught from scholl, in early february. Treated OTC drops. I then caught the conjunctivitis which was very bad and edematous. I (mother) have been tested for COVID-19 on **/**/*** which was negative (nose and throat swab). Symptoms at the time: feeling hot (but recorded as 36C and constant headaches fo…
7.95362	PG	y	Female	At the beginning and end of each term	At the beginning and end of each term	I wouldn't agree to have any more swabs done	At the beginning and end of each term
7.02298	PG	y	Female	The frequency of swabbing does not bother me	The frequency of swabbing does not bother me	The frequency of swabbing does not bother me	The frequency of swabbing does not bother me
3.46615	PG	y	Female
1.56876	PG	y	Male	At the beginning and end of each term	At the beginning and end of each term	At the beginning and end of each term	At the beginning and end of each term
4.99095	Staff	y	Female	Once a week	Once a week	Once a week	Once a week
8.47959	PG	y	Female	Once a week	Once a month	Once a week		I WOULDN'T LIKE MY CHILD TO HAVE A BLOOD TEST
9.49234	PG	y	Female	Once a week	Once a week	Once a week		I WOULDN'T LIKE MY CHILD TO HAVE A BLOOD TEST
2.95309	PG	y	Male	I wouldn't agree to have any more swabs done	At the beginning and end of each half-term	At the beginning and end of each half-term	At the beginning and end of each half-term
0.248498	PG	y	Male	At the beginning and end of each half-term	At the beginning and end of each half-term	At the beginning and end of each half-term	At the beginning and end of each half-term
2.812	PG	y	Male	At the beginning and end of each half-term	At the beginning and end of each half-term	At the beginning and end of each half-term		as much as it is needed to be done
0.682432	PG	y	Male	At the beginning and end of each half-term	At the beginning and end of each half-term	At the beginning and end of each half-term		As much as it is needed to be done
7.2739	PG	y	Female	The frequency of swabbing does not bother me	The frequency of swabbing does not bother me	The frequency of swabbing does not bother me	The frequency of swabbing does not bother me
8.77997	Staff	y	Female	At the beginning and end of each term	At the beginning and end of each term	At the beginning and end of each term	At the beginning and end of each term
1.95314	PG		Female	Once a week	Once a week	Once a week	Once a month
8.10358	PG		Female	Once a week	Once a week	Once a week	Once a week
2.82886	PG			I wouldn't agree to have any more swabs done	I wouldn't agree to have any more swabs done	I wouldn't agree to have any more swabs done	I wouldn't agree to have any more tests done
9.60342	Staff		Female	At the beginning and end of each term	I wouldn't agree to have any more swabs done	At the beginning and end of each term	At the beginning and end of each term
9.38462	PG		Female
2.60029	PG		Male	Once a week	I wouldn't agree to have any more swabs done	Once a month	I wouldn't agree to have any more tests done
1.24024	PG		Female	Once a week	I wouldn't agree to have any more swabs done	Once a month	I wouldn't agree to have any more tests done
3.75653	Staff		Female	Once a week	At the beginning and end of each half-term	Once a month	I wouldn't agree to have any more tests done
4.98607	PG		Male	Once a week	Once a month	Once a week		blood test only if necessary ie if child is unwell
9.47863	PG		Male	Once a week		Once a week
9.3067	PG		Male	Once a week	Once a week	Once a week	At the beginning and end of each term
0.937226	Staff			Once a week	Once a week	Once a week	Once a month
6.88518	PG			Once a week	Once a month	Once a week	Once a month
4.53906	PG		Female	Once a week	Once a month	Once a week	Once a month
1.46308	Staff		Female	Once a week	Once a week	Twice a week	Once a month
5.53068	PG		Male	Once a week	Once a week	Once a week	At the beginning and end of each half-term
5.54031	Staff			At the beginning and end of each half-term	At the beginning and end of each half-term	At the beginning and end of each half-term	Once a month
3.88458	PG		Female	Once a week	Once a week	Once a week	Once a week
8.61989	PG		Female	Once a week	Once a week	Once a week	Once a month
5.21225	PG		Female	Once a week	Once a week	Once a week	I wouldn't agree to have any more tests done
8.747	PG		Female	Once a week	Once a week	Once a week	At the beginning and end of each term	* never had a blood test
6.2735	PG		Male	Once a month	I wouldn't agree to have any more swabs done	I wouldn't agree to have any more swabs done	I wouldn't agree to have any more tests done
1.85719	PG			Once a week	Once a week	Once a week	Once a month
5.37151	PG		Female	Once a week	Once a week	Once a week	I wouldn't agree to have any more tests done
3.58057	PG		Female	Twice a week	Twice a week	Once a week	Once a month
5.84691	PG		Female	Daily	Daily	Daily	Once a month
2.45909	PG		Female	Once a week	The frequency of swabbing does not bother me	Once a week	Once a month
2.80987	PG		Female	At the beginning and end of each half-term	At the beginning and end of each half-term
6.08558	Staff		Male	Once a week	Once a week	Once a week	At the beginning and end of each term
3.0215	PG		Female	Once a week	I wouldn't agree to have any more swabs done	I wouldn't agree to have any more swabs done	I wouldn't agree to have any more tests done
8.45348	Staff		Female	Once a week	Once a week	Once a week	Once a month
6.51593	Staff	y	Female
8.2793	Staff	y	Male
2.5573	PG	y	Female
6.81216	Staff	y	Male					not in questionnaire
5.78771	PG	y	Male
4.92006	PG	y	Female
8.56734	Staff	y
5.70919	Staff	y
5.00703	Staff	y
7.2655	Staff	y
9.92231	Staff	y
8.44073	Staff	y
7.7942	Staff	y
1.94176	Staff	y
8.91981	Staff	y
8.83085	Staff	y	Female
6.53837	Staff	y
5.71115	PG	y	Male
0.388923	PG	y	Male
7.73743	PG	y	Female
8.33616	Staff	y	Male
9.43432	PG	y	Female
1.61991	PG	y	Male
4.57392	PG	y	Male					Telephone call to mother, * * on **/**/**** at **:**; she gave consent to items 8 and 9 on the consent form (**).
1.95846	PG	y	Male					No to blood test and storing blood for future research.
8.56877	Staff	y	Female
6.48501	Staff	y	Female
8.20786	Staff	y	Female
0.191092	Staff	y	Female
9.52795	Staff	y						not in questionnaire
7.66473	Staff	y						not in questionnaire
3.87001	Staff	y
9.33131	PG	y
6.7329	PG	y	Male
6.8137	Staff	y	Female
9.7729	PG	y	Female
8.43072	PG	y
8.35748	PG	y	Male
1.78887	Staff	y		At the beginning and end of each half-term	At the beginning and end of each half-term	At the beginning and end of each half-term	At the beginning and end of each half-term
7.98788	Staff	y
0.32369	Staff	y
6.96727	PG	y	Male
0.104974	Staff	y
0.357376	PG	y	Male
2.65044	PG	y
4.20992	PG	y	Female
4.61475	PG	y	Female
6.93572	PG	y	Female
3.02984	PG	y	Female
9.26878	PG	y	Male
4.85239	PG	y	Male
8.45526	PG	y
1.5749	PG	y	Male
2.76867	PG	y	Female
7.00978	PG	y
0.328346	PG	y	Female
4.24573	PG	y	Female
8.15631	PG	y	Female
3.50163	PG	y	Male
1.95068	Staff	y
8.02007	PG	y	Male
5.71439	PG	y	Male
9.29056	PG	y	Female
8.61972	PG	y	Male
2.0029	PG	y	Female					Only once now, unless have symptoms of COVID
6.04085	PG	y	Female					Only once now, unless have symptoms of COVID
2.7635	PG	y	Male			Daily	At the beginning and end of each term
9.80508	Staff	y
7.93189	PG		Female	Once a month	I wouldn't agree to have any more swabs done	The frequency of swabbing does not bother me	At the beginning and end of each half-term
5.40985	Staff			Once a week	Once a week	Once a week	Once a month
9.392	Staff	y	Female
5.97102	PG	y	Male
0.776401	Staff	y	Female
2.57088	Staff	y	Female
5.69267	Staff	y	Female
4.26778	Staff	y	Female
6.76286	Staff	y	Female
0.82704	Staff	y	Female
0.153473	Staff	y	Female
9.3756	Staff	y	Female
8.64458	Staff	y	Female
1.32768	Staff	y	Female
9.50362	Staff	y	Female
7.82163	PG	y	Female
6.47609	Staff	y	Female
9.93685	Staff	y	Female
6.15654	Staff	y	Male
1.97685	PG	y	Female
0.309264	PG	y	Male
2.07253	PG	y	Female
0.0448721	Staff	y	Female
3.85396	Staff	y	Female
4.55735	Staff	y
2.57382	Staff	y	Female
5.59798	Staff	y	Male
9.01004	Staff	y	Female
2.24412	Staff	y	Female
7.4473	Staff	y	Male
3.79988	Staff	y	Female
8.46509	Staff	y	Female
3.53223	Staff	y	Female
8.46113	Staff	y	Female
7.39758	Staff	y	Female
1.12192	Staff	y	Female
2.17646	Staff	y	Female
2.66075	PG	y	Male	At the beginning and end of each term	At the beginning and end of each term	Once a month	At the beginning and end of each term
3.10432	Staff	y	Female	At the beginning and end of each half-term	At the beginning and end of each half-term	Twice a week	At the beginning and end of each half-term
3.4969	Staff	y		At the beginning and end of each term	At the beginning and end of each term	At the beginning and end of each term	At the beginning and end of each term
0.62276	PG	y	Male	Once a week	Once a week	Once a week	At the beginning and end of each term
0.441219	PG		Male	Daily	Daily	Daily	Once a month	ALL AS LONG AS HE IS NOT DISTRESSED
2.93634	Staff		Female	Once a week	Once a month	Once a week	I wouldn't agree to have any more tests done
1.20779	Staff		Female	Once a week	Once a week
1.66573	PG		Male	Once a week	Once a week	Once a week
1.99386	Staff			The frequency of swabbing does not bother me	The frequency of swabbing does not bother me	The frequency of swabbing does not bother me	I wouldn't agree to have any more tests done
0.343766	PG		Female	Once a week	Once a week	Once a month	Once a month
1.03907	PG		Female	I wouldn't agree to have any more swabs done	I wouldn't agree to have any more swabs done	I wouldn't agree to have any more swabs done	I wouldn't agree to have any more tests done
7.85575	Staff		Female	Once a week	Once a week	Once a week	I wouldn't agree to have any more tests done
0.22217	Staff		Female	I wouldn't agree to have any more swabs done	I wouldn't agree to have any more swabs done	I wouldn't agree to have any more swabs done	At the beginning and end of each term
0.88371	PG			The frequency of swabbing does not bother me	The frequency of swabbing does not bother me	The frequency of swabbing does not bother me	The frequency of swabbing does not bother me
9.36967	PG		Male	Daily	Daily	Daily	At the beginning and end of each term
2.43932	PG		Male	Once a week	Once a week	Once a week	I wouldn't agree to have any more tests done
4.67652	PG			The frequency of swabbing does not bother me	The frequency of swabbing does not bother me	The frequency of swabbing does not bother me	The frequency of swabbing does not bother me
7.83168	PG		Male	Once a week	Once a week	Once a week	Once a week
1.80756	PG		Female	Once a week	I wouldn't agree to have any more swabs done	I wouldn't agree to have any more swabs done	I wouldn't agree to have any more tests done
8.24929	Staff		Female	Once a month	Once a month	Once a month	Once a month
2.83415	Staff		Female	The frequency of swabbing does not bother me	The frequency of swabbing does not bother me	The frequency of swabbing does not bother me	The frequency of swabbing does not bother me
7.77404	Staff		Female	Once a month	Once a month	Once a month	At the beginning and end of each half-term
9.61622	PG		Male	Daily	Once a week	Daily	I wouldn't agree to have any more tests done
2.87803	PG		Male	Once a month	Once a month	Once a month	Once a month
3.90785	Staff		Female	Once a week	Once a week	Once a week	Once a week
4.69829	Staff		Female	The frequency of swabbing does not bother me	The frequency of swabbing does not bother me	The frequency of swabbing does not bother me	I wouldn't agree to have any more tests done
3.55152	Staff			Once a week	The frequency of swabbing does not bother me	The frequency of swabbing does not bother me	The frequency of swabbing does not bother me
8.88893	PG		Female	Once a week	Once a week	Once a week	Once a month
0.898635	PG		Male	Once a week	Once a week	Once a week	Once a month
7.00645	PG		Female	The frequency of swabbing does not bother me	I wouldn't agree to have any more swabs done	The frequency of swabbing does not bother me	I wouldn't agree to have any more tests done
5.05235	PG		Female	I wouldn't agree to have any more swabs done	I wouldn't agree to have any more swabs done	I wouldn't agree to have any more swabs done	I wouldn't agree to have any more tests done	None
5.02314	PG		Female	Once a week	I wouldn't agree to have any more swabs done	I wouldn't agree to have any more swabs done	I wouldn't agree to have any more tests done	NONE
1.93104	PG		Female	Once a week	Once a week	Once a week	The frequency of swabbing does not bother me
7.59967	Staff		Female	Once a week	Once a week	Twice a week	I wouldn't agree to have any more tests done
3.96933	PG		Male	Once a week	Once a week	Once a week	Once a month
5.11548	Staff		Female	The frequency of swabbing does not bother me	The frequency of swabbing does not bother me	The frequency of swabbing does not bother me	The frequency of swabbing does not bother me
3.8758	PG		Female	Once a week	Once a week	Once a week	The frequency of swabbing does not bother me	Keep me informed on results
8.78288	Staff		Female	Once a week
2.21836	Staff		Female	Once a week	I wouldn't agree to have any more swabs done	I wouldn't agree to have any more swabs done	I wouldn't agree to have any more tests done
0.495201	PG		Male	The frequency of swabbing does not bother me	The frequency of swabbing does not bother me	The frequency of swabbing does not bother me	Once a month
5.15916	PG		Male	Once a week	Once a week	Once a week	Once a month
6.18228	Staff	y	Female
4.87757	Staff	y	Female
9.04067	Staff	y	Female					not in questionnaire
3.55648	Staff	y	Male					not in questionnaire
7.82437	Staff	y						not in questionnaire
7.86249	PG	y	Male
7.6978	PG	y	Male
6.71227	Staff	y
4.90173	Staff	y
5.41238		y	Female
7.88309	PG	y	Male
8.52225	Staff	y	Female
4.07435	PG	y	Male
2.63518	Staff	y	Male
1.56486	Staff	y	Female
5.69395	Staff	y	Male
0.639804	Staff	y	Female
3.26858	Staff	y	Female
2.02039	Staff	y	Female
5.5848	Staff	y	Female
0.297072	Staff	y	Female
8.80157	PG	y	Male
3.76791	PG	y
5.77445	Staff	y	Male
4.21973	PG	y	Female
7.60713	PG	y	Male
4.19815	Staff	y	Male
6.03668	PG	y						**/**/**** **:** - telephoned mother and confirmed consent. **
0.324348	PG	y						**/**/**** **:** - telephone call to mother to confirm consent. * * (**)
9.47586	Staff	y	Male
6.45005	Staff	y	Female
1.55505	Staff	y	Female
0.902665	Staff	y	Female
7.73653	Staff	y	Female
1.53212	Staff	y						I am profoundly deaf. I am unable to phone you, I do not know how to contact you.
4.11176	Staff	y
4.69634	Staff	y
0.910592	Staff	y	Female	At the beginning and end of each term	At the beginning and end of each term	The frequency of swabbing does not bother me	The frequency of swabbing does not bother me
2.5879	PG	y	Female	Once a month	Once a month	The frequency of swabbing does not bother me	Once a month
8.43258	PG	y	Female	Once a week	Once a week	Once a week	Once a week
0.790173	PG	y	Female	At the beginning and end of each term	At the beginning and end of each term	At the beginning and end of each term	I wouldn't agree to have any more tests done
4.56887	Staff	y	Female
0.580744	Staff	y	Female	Once a week	Once a month	Once a month	Once a month
5.89413	PG	y	Female	At the beginning and end of each half-term	Once a month	The frequency of swabbing does not bother me	At the beginning and end of each term
9.58814	PG	y	Male	At the beginning and end of each half-term	Once a month	The frequency of swabbing does not bother me	At the beginning and end of each term
5.59265	PG	y	Female	The frequency of swabbing does not bother me	The frequency of swabbing does not bother me	The frequency of swabbing does not bother me	The frequency of swabbing does not bother me
5.41762	PG	y	Female					not answered
9.18765	PG	y	Male	At the beginning and end of each term	At the beginning and end of each term	At the beginning and end of each term	At the beginning and end of each term
5.67539	Staff	y		I wouldn't agree to have any more swabs done	I wouldn't agree to have any more swabs done	I wouldn't agree to have any more swabs done	I wouldn't agree to have any more tests done
1.396	PG	y		At the beginning and end of each half-term	Once a month	At the beginning and end of each half-term
6.32861	PG	y		I wouldn't agree to have any more swabs done	At the beginning and end of each half-term	I wouldn't agree to have any more swabs done	I wouldn't agree to have any more tests done
6.32324	PG	y	Male	I wouldn't agree to have any more swabs done	At the beginning and end of each half-term	I wouldn't agree to have any more swabs done	I wouldn't agree to have any more tests done
1.97817	PG	y		At the beginning and end of each term	At the beginning and end of each term	At the beginning and end of each term	At the beginning and end of each term
7.77716	PG	y	Female	At the beginning and end of each term	At the beginning and end of each term	At the beginning and end of each term	At the beginning and end of each term
3.58987	PG	y		Once a month	Once a month	Once a month	At the beginning and end of each term
6.29838	PG	y	Male	At the beginning and end of each term	At the beginning and end of each term	At the beginning and end of each term	At the beginning and end of each term
5.09013	PG	y	Male
3.05862	PG	y	Male	At the beginning and end of each half-term	At the beginning and end of each half-term	At the beginning and end of each half-term	I wouldn't agree to have any more tests done
2.36385	PG	y	Male	At the beginning and end of each term	At the beginning and end of each term	I wouldn't agree to have any more swabs done	At the beginning and end of each term
2.58576	PG	y	Female
4.90068	PG	y		Once a month	Once a month	Once a month	Once a month
9.20041	PG	y	Male	At the beginning and end of each half-term	At the beginning and end of each term	Once a week	Once a month
7.23399	Staff	y		The frequency of swabbing does not bother me	The frequency of swabbing does not bother me	The frequency of swabbing does not bother me	The frequency of swabbing does not bother me
0.985783	PG	y	Female	The frequency of swabbing does not bother me	The frequency of swabbing does not bother me	The frequency of swabbing does not bother me	The frequency of swabbing does not bother me
2.69123	PG	y	Male	Once a month	Once a month	The frequency of swabbing does not bother me	Once a month
2.79949	PG	y	Female	I wouldn't agree to have any more swabs done	I wouldn't agree to have any more swabs done	I wouldn't agree to have any more swabs done	I wouldn't agree to have any more tests done
3.84297	Staff	y	Female	Once a week	Once a week	Once a week	Once a week
1.58131	PG	y		At the beginning and end of each term	I wouldn't agree to have any more swabs done	At the beginning and end of each term	At the beginning and end of each term
5.77894	PG	y	Male	Twice a week	Twice a week	Twice a week	Twice a week
5.16641	PG	y	Male	I wouldn't agree to have any more swabs done	I wouldn't agree to have any more swabs done	I wouldn't agree to have any more swabs done	I wouldn't agree to have any more tests done	THANK YOU FOR ALL
4.06987	PG	y	Male	At the beginning and end of each term	I wouldn't agree to have any more swabs done	At the beginning and end of each term	At the beginning and end of each term
2.63582	PG	y	Male	At the beginning and end of each half-term	At the beginning and end of each half-term
8.22617	PG	y	Male	At the beginning and end of each term	I wouldn't agree to have any more swabs done	At the beginning and end of each term	At the beginning and end of each term
1.03114	PG	y	Male	The frequency of swabbing does not bother me	At the beginning and end of each half-term	At the beginning and end of each half-term	At the beginning and end of each half-term	I HAVE NO CONCERNS ABOUT MY CHILD'S HEALTH
3.15427	Staff	y		Once a month	Once a month	Once a month	Once a month
1.31532	PG	y	Female	At the beginning and end of each half-term
8.24995	Staff	y	Female	I wouldn't agree to have any more swabs done	I wouldn't agree to have any more swabs done	At the beginning and end of each half-term	At the beginning and end of each half-term
1.42752	Staff	y	Female		At the beginning and end of each half-term	At the beginning and end of each half-term	At the beginning and end of each half-term
2.16697	PG	y	Female	At the beginning and end of each half-term
8.68509	PG	y	Female	Once a month	At the beginning and end of each half-term	At the beginning and end of each term	At the beginning and end of each half-term
6.54918	PG	y	Female	Once a month	Once a month	Once a month	Once a month	I am grateful for this iniative. Thank you very kindly
7.87648	PG	y	Male	Once a month	Once a month	Once a month	Once a month	I wish to thank you all for this wonderful iniative
9.75604	PG	y	Female	At the beginning and end of each term	At the beginning and end of each term	At the beginning and end of each term
4.72496	PG		Female	Once a week	At the beginning and end of each term	At the beginning and end of each term	Once a month
3.23227	PG		Male	Once a week	Once a week	Once a week	At the beginning and end of each half-term
0.114435	PG		Male	At the beginning and end of each term	At the beginning and end of each term	At the beginning and end of each term	At the beginning and end of each term
1.21453	PG		Male	Once a week	At the beginning and end of each half-term	Once a week	At the beginning and end of each term
7.30421	PG		Male	The frequency of swabbing does not bother me	The frequency of swabbing does not bother me	The frequency of swabbing does not bother me	The frequency of swabbing does not bother me
0.168708	PG		Female	Once a week	Once a week	Once a week	Once a week
3.67551	Staff		Female	Once a week	Once a week	Once a week	Once a week
1.1297	PG		Male	Once a week	Once a week	Once a week	Once a month
9.43373	PG		Male	Once a week	Once a week	Once a week	Once a month
2.06221	PG		Male	Once a week	Once a week	Once a week	Once a month
6.36701	Staff		Female	Once a week	Once a week	Daily	Once a week
5.32801	PG		Male	The frequency of swabbing does not bother me	The frequency of swabbing does not bother me	The frequency of swabbing does not bother me	The frequency of swabbing does not bother me	None
4.61586	PG		Male	Once a week	Once a week	Once a week
6.28078	Staff		Male	Once a week	Once a week	Once a week	Once a week
8.04915	PG		Female	Once a week	Once a month	Once a week	Once a month
3.13236	PG		Male
1.39582	PG		Female		Twice a week	Twice a week	Once a month
8.90257	PG		Male	I wouldn't agree to have any more swabs done	I wouldn't agree to have any more swabs done	I wouldn't agree to have any more swabs done	I wouldn't agree to have any more tests done
7.42959	PG		Female	Once a week	Once a week	Once a week	I wouldn't agree to have any more tests done
7.89644	Staff		Female
2.42434	Staff		Female	Once a week	Once a week	Once a week	Once a week
3.96314	PG		Male	Daily	Daily	Daily
1.51919	PG			Once a week	I wouldn't agree to have any more swabs done	I wouldn't agree to have any more swabs done	I wouldn't agree to have any more tests done
3.36402	Staff		Male	Once a month	Once a month	Once a month	Once a month
6.11941	Staff		Female	Once a week	Once a week	Once a week	At the beginning and end of each half-term
6.29041	PG		Female	Once a month	I wouldn't agree to have any more swabs done	I wouldn't agree to have any more swabs done	I wouldn't agree to have any more tests done
7.50163	PG		Female	At the beginning and end of each term	At the beginning and end of each term	At the beginning and end of each term	At the beginning and end of each term
5.07326	PG		Male	Once a month	Once a month	Once a month	Once a month
1.57017	Staff		Female	Once a week		Once a week	Once a week
2.60108	PG		Female	Once a week	Once a week	Once a week	At the beginning and end of each term
2.10028	PG		Female
8.1015	PG		Female	Once a week	Once a week	Once a week	Once a month
1.38918	PG		Female	Daily	Twice a week	Daily	Once a month
8.16433	PG		Male	At the beginning and end of each term	At the beginning and end of each term	At the beginning and end of each term	At the beginning and end of each term	Previously child did not attend any school at all
2.09792	PG		Female	At the beginning and end of each term	At the beginning and end of each term	At the beginning and end of each term	At the beginning and end of each term	Did not go to school at all during the lockdown. Parent disagrees: Only beginning and end of term
2.08619	PG		Female	At the beginning and end of each half-term	At the beginning and end of each term	At the beginning and end of each term	At the beginning and end of each term
2.14155	PG		Female	Once a week	Once a week	Twice a week	Once a week
6.82628	Staff		Female	Once a week	Once a week	Once a week	Once a month
2.85806	Staff		Male	Once a week
7.11051	Staff		Female	Once a week
3.25894	PG		Female	Once a week	Once a week	Once a week	Once a month
5.01947	PG		Male	Once a week	Once a week	Once a week	I wouldn't agree to have any more tests done
4.7282	PG		Male					5th child 15
8.43814	PG		Female	Once a week	Once a week	Once a week	Once a month
1.52376	PG		Female	Once a week	Once a week	Once a week	I wouldn't agree to have any more tests done	no blood tests
3.66986	PG		Male	Once a month	I wouldn't agree to have any more swabs done	Once a week	I wouldn't agree to have any more tests done
3.07545	PG		Female	Once a month	At the beginning and end of each term	Once a month	I wouldn't agree to have any more tests done
6.90251	PG		Male	Once a month	Once a month	Once a month	Once a month
7.25296	PG		Male	Once a month	Once a month	Once a month	Once a month
1.31531	PG		Male	Once a week	Once a week	Once a week	Once a month
8.12523	PG		Female	Once a month	Once a month	Once a month	Once a month
2.24201	PG		Male	At the beginning and end of each half-term	I wouldn't agree to have any more swabs done	I wouldn't agree to have any more swabs done	I wouldn't agree to have any more tests done
5.70908	PG		Male	Once a month	Once a month	Once a month	Once a month
1.78924	PG		Male	Once a week	Once a week	Once a week	Once a month
6.50938	PG		Female	Once a month	Once a month	Once a week	At the beginning and end of each half-term
3.284	PG		Female	At the beginning and end of each term	At the beginning and end of each term	At the beginning and end of each term	At the beginning and end of each term	disclaimer: please just take a test but don't vaccinate my daughter
4.08696	PG		Female			The frequency of swabbing does not bother me
6.14256	PG		Male	Once a week		Once a week	I wouldn't agree to have any more tests done
2.08821	PG		Male	Once a week	Once a week	Once a week	I wouldn't agree to have any more tests done
4.8493	Staff		Female	Once a month	Once a month	Once a month	At the beginning and end of each term
7.54202	PG		Female	At the beginning and end of each half-term	At the beginning and end of each half-term	The frequency of swabbing does not bother me	At the beginning and end of each half-term
6.00682	Staff		Male	I wouldn't agree to have any more swabs done	I wouldn't agree to have any more swabs done	I wouldn't agree to have any more swabs done	I wouldn't agree to have any more tests done
1.25129	PG		Male
6.76034	PG		Female	I wouldn't agree to have any more swabs done
5.96189	PG		Male	Once a month	Once a month	Once a month	At the beginning and end of each half-term
5.15174	PG		Female	Once a month	I wouldn't agree to have any more swabs done	I wouldn't agree to have any more swabs done	I wouldn't agree to have any more tests done
7.30529	PG		Male	Once a month	I wouldn't agree to have any more swabs done	I wouldn't agree to have any more swabs done	I wouldn't agree to have any more tests done
7.6103	PG		Male	Once a week	I wouldn't agree to have any more swabs done	Once a week	I wouldn't agree to have any more tests done
8.45274	Staff		Female	Once a week	I wouldn't agree to have any more swabs done	I wouldn't agree to have any more swabs done	I wouldn't agree to have any more tests done
5.84436	PG		Male	Twice a week	Twice a week	Twice a week		I would like to have more information about the blood tests. 5 th child's age is 1 year.
8.61665	PG		Female	Once a month	Once a month	Once a week	At the beginning and end of each half-term
1.49946	PG		Male	Once a week	Once a month	Daily	Once a week	children's age- 9 and 6
2.66158	PG		Male	Once a week	Once a week	Once a week	At the beginning and end of each half-term
0.0978747	PG		Female	Once a week	Once a week	Once a week	At the beginning and end of each half-term
2.49904	PG		Male	Daily	The frequency of swabbing does not bother me	The frequency of swabbing does not bother me	The frequency of swabbing does not bother me
0.0211251	PG		Female	Once a week
6.12514	PG		Female	Once a week
9.24882	PG		Male
7.16465	PG		Female	Once a week	I wouldn't agree to have any more swabs done	I wouldn't agree to have any more swabs done	I wouldn't agree to have any more tests done
9.95379	PG		Female	Once a week	I wouldn't agree to have any more swabs done	Once a week	The frequency of swabbing does not bother me
1.78246	PG		Male	Once a week	Once a month	Once a week
4.54106	PG		Female	Once a week	Once a week	Once a week	Once a month
5.60349	Staff		Female	Once a week	Once a week	Once a week	Once a week
9.7681	PG		Male	Once a week
1.25407	PG		Female	Once a week
3.57479	PG			Once a week
3.33744	PG		Female	Once a week	Twice a week	Twice a week
8.81454	PG		Male	Once a week	Once a week	Once a week
9.06433	PG		Male	Once a week	Once a week	Once a week
0.217818	PG		Male	Once a week	Once a week	Once a week	Once a month
2.48226	PG		Male	The frequency of swabbing does not bother me	The frequency of swabbing does not bother me	The frequency of swabbing does not bother me	The frequency of swabbing does not bother me
6.8533	PG		Male	The frequency of swabbing does not bother me	Once a month	The frequency of swabbing does not bother me	I wouldn't agree to have any more tests done
4.06456	PG		Female	Once a week	Once a week	Once a week	Once a month
1.41258	PG		Female	Once a month	Once a month	Once a month	Once a month
8.54427	PG		Female	The frequency of swabbing does not bother me	The frequency of swabbing does not bother me	The frequency of swabbing does not bother me	The frequency of swabbing does not bother me
9.4937	PG		Male	Once a month	Once a month	Once a month	Once a month
9.88962	PG		Male	Once a month	Once a month	Once a month	Once a month	I do appreciate this because I have been trying to be tested and include my son.
4.8807	PG		Female	Once a week	I wouldn't agree to have any more swabs done	I wouldn't agree to have any more swabs done	I wouldn't agree to have any more tests done
7.22933	PG		Male	Once a week	Once a week	Once a week	Once a week
4.5147	PG		Female	Once a week	Once a week	Once a week	Once a week	form needs to be checked*
9.90286	PG		Male	Once a week	Once a week	Once a week	Once a week
5.97818	PG		Female
2.52012	PG		Male	Once a week	Once a week	Once a week	Once a month
8.74208	PG		Male	Once a week
0.820419	PG		Male	Once a week	Once a week	Once a week	At the beginning and end of each term
1.19564	PG		Male	Once a week	I wouldn't agree to have any more swabs done	I wouldn't agree to have any more swabs done	I wouldn't agree to have any more tests done
8.56308	PG		Female	Once a week	Once a week	Once a week	Once a week
9.58818	PG		Female	Once a week	Once a week	Once a week	Once a week
2.29701	PG		Female	Once a week	Once a week	Once a week	Once a week
1.40962	PG		Female	The frequency of swabbing does not bother me	I wouldn't agree to have any more swabs done	At the beginning and end of each half-term	Twice a week	only wants child to have one saliva swab. Just one.
8.51086	PG		Male	Once a month	Once a month	Once a month	Once a month
7.03711	PG		Female	The frequency of swabbing does not bother me	I wouldn't agree to have any more swabs done	The frequency of swabbing does not bother me	The frequency of swabbing does not bother me
3.00284	PG			Once a week	I wouldn't agree to have any more swabs done	Once a week	I wouldn't agree to have any more tests done
3.47337	PG		Female	I wouldn't agree to have any more swabs done	I wouldn't agree to have any more swabs done	I wouldn't agree to have any more swabs done		NO BLOOD TESTS
2.95485	PG			I wouldn't agree to have any more swabs done	I wouldn't agree to have any more swabs done	The frequency of swabbing does not bother me	I wouldn't agree to have any more tests done
4.14577	PG		Male	Once a week	Once a week	Once a week	Once a week
8.76504	PG		Male	Once a week	Once a week	Once a week	Once a week
4.4423	PG		Male	The frequency of swabbing does not bother me	The frequency of swabbing does not bother me	The frequency of swabbing does not bother me	The frequency of swabbing does not bother me
7.97392	PG			Once a week	Once a week	Once a week	Once a week
4.53668	Staff	y	Female
3.48692	Staff	y						not in questionnaire
0.719095	Staff	y	Male					not in questionnaire
9.25025	Staff	y	Female
6.59026	Staff	y	Female
0.414828	Staff	y	Female
9.56065	Staff	y	Female
0.891228	PG	y	Male
6.14205	Staff	y	Female
6.99645	PG	y	Female
3.24804	Staff	y	Female
5.13754	Staff	y	Male
3.7398	Staff	y	Female
3.72249	Staff	y	Female
1.21845	Staff	y	Female
9.62454	PG	y	Female	Once a month	Once a month	Once a month	Once a month
3.30697	Staff	y		Once a week	Once a week	Twice a week	Once a week
1.64691	Staff	y		At the beginning and end of each term	At the beginning and end of each term	At the beginning and end of each term	At the beginning and end of each term
9.63135	PG	y	Male	I wouldn't agree to have any more swabs done	I wouldn't agree to have any more swabs done	I wouldn't agree to have any more swabs done	I wouldn't agree to have any more tests done
2.71948	Staff	y	Female	Once a month	Once a week	Once a month	Once a month
1.99322	PG	y	Female	I wouldn't agree to have any more swabs done	I wouldn't agree to have any more swabs done	The frequency of swabbing does not bother me	I wouldn't agree to have any more tests done
9.30354	Staff	y	Female	Once a week	Once a week	Once a week	Once a week
4.56687	PG	y	Female	The frequency of swabbing does not bother me	The frequency of swabbing does not bother me	The frequency of swabbing does not bother me	The frequency of swabbing does not bother me
3.89703	PG	y	Male	The frequency of swabbing does not bother me	The frequency of swabbing does not bother me	The frequency of swabbing does not bother me	At the beginning and end of each term
2.69722	Staff		Female	Once a week	Once a week	Once a week	Once a week
0.876053	PG		Male	Once a week	Once a week	Once a week	Once a week
4.28085	PG		Female	Once a week	Once a week	Once a week	Once a month
4.68119	PG		Male	Once a month	Once a month	Once a month	At the beginning and end of each half-term
9.34758	Staff			Once a week	Once a week	Once a week	Once a month
2.75189	Staff		Male	Once a week	Once a week	Once a week	Once a month
2.69172	Staff		Male	The frequency of swabbing does not bother me	The frequency of swabbing does not bother me	The frequency of swabbing does not bother me	Once a month
5.47427	PG		Female	Once a week	I wouldn't agree to have any more swabs done	I wouldn't agree to have any more swabs done		no blood test
8.27763	Staff		Female	Once a week	Once a week	Once a week	Once a month
3.54108	Staff		Female	Once a week		Once a week	The frequency of swabbing does not bother me
5.7941	PG		Male	Once a week	Once a week	Twice a week	Once a month	** spoke to mother @ **:** **/**/*** - consented to weekly swabbing
3.61033	PG		Male	Daily	Once a week	Daily	Once a week
4.08264	PG		Male	Once a week	Once a week	Once a week	Once a week
2.92248	Staff		Female	Once a week	Once a week	Once a week	Once a week
3.90581	PG		Male	At the beginning and end of each half-term	Once a month	Once a week	At the beginning and end of each half-term
1.06863	Staff		Female	The frequency of swabbing does not bother me	The frequency of swabbing does not bother me	The frequency of swabbing does not bother me
3.09335	Staff		Female	Once a week	Once a week	Once a week	Once a week
1.62439	Staff		Female	Once a week	Once a week	Once a week	Once a month	The staff mentions that the frequency of swabbing does not bother her but for the blood test she states that it should be done at the beginning and end of each half term
0.0325438	Staff		Male	Once a week	Once a week	Once a week	Once a month
1.50903	PG		Male	Once a week	Once a week	Once a week	I wouldn't agree to have any more tests done
7.71785	PG		Male	At the beginning and end of each term	I wouldn't agree to have any more swabs done	I wouldn't agree to have any more swabs done	I wouldn't agree to have any more tests done	Nurse has spoke to Mum regarding Nose swab and if Nose swab is +ve school will be informed. Mum has agreed to the terms
1.72465	PG			Once a week	I wouldn't agree to have any more swabs done	At the beginning and end of each half-term	At the beginning and end of each half-term
3.55304	Staff		Female	Once a week	At the beginning and end of each term	Once a week	The frequency of swabbing does not bother me
8.68581	Staff			Once a month	Once a month	Once a month	I wouldn't agree to have any more tests done
0.866434	Staff		Male	Twice a week	Twice a week	Twice a week	Once a week
1.34196	PG		Female		I wouldn't agree to have any more swabs done	I wouldn't agree to have any more swabs done	I wouldn't agree to have any more tests done	age *
1.60556	Staff		Female	The frequency of swabbing does not bother me	The frequency of swabbing does not bother me	The frequency of swabbing does not bother me	The frequency of swabbing does not bother me
3.02266	Staff		Female	Once a week	Once a month	Once a month	I wouldn't agree to have any more tests done
5.61445	Staff		Male	Once a week
6.75117	Staff		Female	The frequency of swabbing does not bother me	At the beginning and end of each half-term	The frequency of swabbing does not bother me	I wouldn't agree to have any more tests done
1.08031	Staff			Once a week	Once a week	Once a week	Once a month
5.31337	PG			The frequency of swabbing does not bother me	I wouldn't agree to have any more swabs done	Once a month	I wouldn't agree to have any more tests done
2.36912	Staff		Female	Once a month	Once a month	Once a month	I wouldn't agree to have any more tests done
0.84475	PG		Female	Once a week	I wouldn't agree to have any more swabs done	I wouldn't agree to have any more swabs done	I wouldn't agree to have any more tests done
5.09823	Staff		Female	At the beginning and end of each term	At the beginning and end of each term	At the beginning and end of each term	At the beginning and end of each term
1.35072	Staff		Female	Once a week	Once a week	Once a week	At the beginning and end of each half-term
4.51099	Staff			I wouldn't agree to have any more swabs done	I wouldn't agree to have any more swabs done	I wouldn't agree to have any more swabs done	I wouldn't agree to have any more tests done
7.99894	PG		Female	The frequency of swabbing does not bother me	The frequency of swabbing does not bother me	The frequency of swabbing does not bother me	I wouldn't agree to have any more tests done
3.22479	PG		Male	Once a week	Once a week	Once a week	I wouldn't agree to have any more tests done
9.97669	PG		Female	Once a week			At the beginning and end of each half-term
8.16269	PG			Once a week	Once a week	Once a week	I wouldn't agree to have any more tests done
7.09862	Staff		Female	Once a month	Once a month	Once a week	At the beginning and end of each half-term
0.196574	PG		Female	Once a week
7.74151	PG			Daily	Daily	Daily	Once a month
0.0533135	PG		Male	Daily	Daily	Daily	Once a month
3.9085	PG		Female	Once a month	Once a month	Once a month	Once a month
0.602725	PG		Female	The frequency of swabbing does not bother me	The frequency of swabbing does not bother me	The frequency of swabbing does not bother me	Once a week
3.58919	PG		Female	Once a week	Once a month	Once a week	I wouldn't agree to have any more tests done	if * makes a fuss, do not do it
7.24286	PG		Female	Once a week		Once a week	I wouldn't agree to have any more tests done
6.76563	Staff		Female	The frequency of swabbing does not bother me	I wouldn't agree to have any more swabs done	The frequency of swabbing does not bother me	I wouldn't agree to have any more tests done
3.03691	Staff		Male
4.71296	Staff		Female	Twice a week	Twice a week	Twice a week	Twice a week
7.9784	PG			Once a week	Once a week	Once a week	I wouldn't agree to have any more tests done
2.53014	Staff	y	Female
4.47942	Staff	y	Female
6.04129	Staff	y		At the beginning and end of each term	At the beginning and end of each term	At the beginning and end of each term	At the beginning and end of each term
3.92183	PG	y	Female	Once a week	Once a week	Once a week	Once a month
7.63098	Staff	y	Female	Once a week	Once a week	Once a week	Once a week
0.640475	Staff	y		The frequency of swabbing does not bother me	The frequency of swabbing does not bother me	The frequency of swabbing does not bother me	The frequency of swabbing does not bother me
3.35377	Staff		Male	Daily	Twice a week	Daily	Once a month
8.95861	Staff		Female	Once a week
8.31877	PG		Female	The frequency of swabbing does not bother me	The frequency of swabbing does not bother me	The frequency of swabbing does not bother me	The frequency of swabbing does not bother me
5.00946	PG		Male	Daily	Once a week	At the beginning and end of each half-term	At the beginning and end of each term
7.44761	PG		Male	Once a week	Once a week	At the beginning and end of each term	At the beginning and end of each term
7.60307	Staff		Female	The frequency of swabbing does not bother me	The frequency of swabbing does not bother me	The frequency of swabbing does not bother me	The frequency of swabbing does not bother me
5.02309	PG		Male	Once a week
7.39315	Staff		Female	Daily	Daily	Daily	Daily
4.03387	Staff		Female	The frequency of swabbing does not bother me	The frequency of swabbing does not bother me	The frequency of swabbing does not bother me	The frequency of swabbing does not bother me
6.3731	PG			Once a month	I wouldn't agree to have any more swabs done	I wouldn't agree to have any more swabs done	I wouldn't agree to have any more tests done
2.5167	PG		Male	Once a week	I wouldn't agree to have any more swabs done	Once a week	I wouldn't agree to have any more tests done
7.06745	PG		Female	Once a week	Once a week	Once a week	Once a month
7.67935	PG		Female	Once a week	At the beginning and end of each term	The frequency of swabbing does not bother me	At the beginning and end of each term
8.14999	Staff		Female	The frequency of swabbing does not bother me	The frequency of swabbing does not bother me	The frequency of swabbing does not bother me	The frequency of swabbing does not bother me
4.49927	Staff		Female	Once a week
9.72481	PG		Male
8.36627	PG		Male	Twice a week	Twice a week	Twice a week	At the beginning and end of each term
9.6801	PG		Female	The frequency of swabbing does not bother me	The frequency of swabbing does not bother me	The frequency of swabbing does not bother me	At the beginning and end of each half-term
6.63577	Staff	y	Female
9.93257	Staff	y	Male
1.56193	Staff	y	Female
1.14663	Staff	y	Male
3.21724	Staff	y	Male
2.78651	Staff	y	Female
6.26075	Staff	y	Female
3.10087	Staff	y	Female
4.49415	Staff	y	Female
0.215364	Staff	y	Female
8.40828	Staff	y	Female
1.80319	PG	y	Male
5.22141	Staff	y	Female
7.69314	Staff	y	Female
6.45054	Staff	y	Female
0.490452	Staff	y	Female
0.382358	Staff	y	Female
3.99934	Staff	y	Male
1.99946	Staff	y	Female
7.80956	Staff	y	Male
1.52705	Staff	y	Male
3.81283	Staff	y	Female
4.53517	Staff	y	Female
9.81706	Staff	y	Female
6.48974	Staff	y	Female
3.54013	Staff	y	Female
9.04897	Staff	y	Female
0.189474	Staff	y	Female
3.4546	Staff	y	Female
8.59017	Staff	y	Female
4.58462	Staff	y	Female
3.35774	Staff	y	Male
1.52081	Staff	y	Female
3.5991	PG	y	Male					* * (**) spoke with * * over the phone at 1**:**. * consented to the study and all points on the consent form. ** signed on * behalf.
4.39847	Staff	y	Female
6.20922	Staff	y	Male
5.21575	PG	y	Male
9.07354	PG	y	Female
2.1512	Staff	y						not in questionnaire
2.41923	Staff	y	Female					not in questionnaire
5.84826	Staff	y	Female					not in questionnaire
2.52441	Staff	y	Female					not in questionnaire
4.8897	Staff	y	Male					not in questionnaire
1.56952	Staff	y	Female					not in questionnaire
2.03699	Staff	y	Male					not in questionnaire
7.82199	Staff	y	Female					not in questionnaire
3.85562	Staff	y	Male					not in questionnaire
8.96349	Staff	y	Female					not in questionnaire
0.962117	Staff	y	Male					not in questionnaire
3.00204	Staff	y	Female					not in questionnaire
1.41277	Staff	y	Female					not in questionnaire
5.04568	Staff	y	Male					not in questionnaire
0.276694	Staff	y	Female					not in questionnaire
3.98778	Staff	y	Female					not in questionnaire
7.10761	Staff	y	Female					not in questionnaire
5.16294	Staff	y	Female					not in questionnaire
8.92945	Staff	y	Female					not in questionnaire
1.51271	Staff	y	Female					not in questionnaire
3.73695	Staff	y	Male					not in questionnaire
9.72875	Staff	y	Male					not in questionnaire
1.07939	Staff	y	Female					not in questionnaire
4.39649	Staff	y	Male					not in questionnaire
1.10285	Staff	y	Female					not in questionnaire
8.23101	Staff	y	Female					not in questionnaire
6.3898	Staff	y	Female					not in questionnaire
6.40184	Staff	y	Male					not in questionnaire
3.57275	Staff	y	Female					not in questionnaire
3.43204	Staff	y	Male					not in questionnaire
9.84681	Staff	y
3.59668	Staff	y	Female					not in questionnaire
8.52801	Staff	y	Female					not in questionnaire
3.44631	Staff	y	Female					not in questionnaire
7.39421	Staff	y	Female					not in questionnaire
2.33835	Staff	y						not in questionnaire
1.62704	Staff	y	Female					not in questionnaire
6.51136	Staff	y	Female					not in questionnaire
1.44128	Staff	y	Female					not in questionnaire
9.06897	Staff	y	Female					not in questionnaire
7.6858	Staff	y						not in questionnaire
4.83265	Staff	y	Female					not in questionnaire
2.93965	Staff	y	Female					not in questionnaire
8.37542	PG	y	Male					not in questionnaire
4.51219	Staff	y	Female					not in questionnaire
9.42024	Staff	y	Female					not in questionnaire
7.2617	PG	y	Female					not in questionnaire
6.17799	Staff	y	Male
2.84898	Staff	y	Female
1.6007	Staff	y	Female
1.38166	PG	y	Female					not in questionnaire
8.31418	Staff	y	Male
8.57489	PG	y	Male					not in questionnaire
3.01834	Staff	y
8.33383	Staff	y	Female
7.08342	Staff	y	Male
8.51991	Staff	y	Female
4.37626	Staff	y	Female
7.09565	Staff	y	Female
5.02403	PG	y
7.52608	Staff	y	Male
8.74443	Staff	y	Male
8.9057	Staff	y
2.63932	Staff	y	Female
4.49626	Staff	y	Female
6.24393	Staff	y	Female
4.39598	Staff	y	Female
5.58889	Staff	y
3.926	Staff	y	Female
8.3281	Staff	y	Female
9.29258	Staff	y	Female
4.23778	Staff	y
2.65711	Staff	y	Male
2.27193	Staff	y	Male
6.95393	Staff	y
6.21719	Staff	y	Female
9.75033	Staff	y	Female
0.297914	Staff	y	Female
7.43569	Staff	y	Female
3.02978	Staff	y	Female
3.42971	Staff	y	Female
3.74777	Staff	y	Male
8.13262	Staff	y	Male
4.4034	Staff	y	Female
4.95792	Staff	y	Female
5.91949	Staff	y	Male
1.96931	Staff	y	Female
2.53661	Staff	y	Female
6.7964	Staff	y	Female
3.11371	Staff	y	Female
4.92809	Staff	y	Female
6.24451	Staff	y	Male
3.42065	Staff	y	Male
3.88864	Staff	y	Female
8.62603	Staff	y	Male
4.89504	Staff	y	Female
4.45404	Staff	y	Female
5.93426	Staff	y	Female
1.12324	PG	y	Male
4.51066	PG	y	Male
2.5752	Staff	y	Male
3.60769	Staff	y	Female
4.37795	Staff	y	Female
1.93577	PG	y
3.59021	PG	y	Female
5.60036	PG	y	Female
0.795198	Staff	y	Female
2.16652	PG	y
6.92704	Staff	y
6.96443	Staff	y
0.217045	Staff	y	Female
9.58777	Staff	y	Female
0.477047	Staff	y	Female
4.70122	Staff	y	Female
6.48042	Staff	y	Male
1.79904	Staff	y	Female
9.43523	Staff	y
1.03304	Staff	y	Female
7.75415	Staff	y	Female
6.64885	Staff	y	Female
6.86278	Staff	y	Female
1.08665	Staff	y	Male
6.52702	Staff	y	Female
2.50051	Staff	y	Female
2.4643	Staff	y	Female
5.51812	Staff	y	Female
9.22601	Staff	y	Male
0.244681	PG	y	Female
3.6797	Staff	y	Female
8.40251	Staff	y	Female
0.315413	Staff	y	Female
1.31634	Staff	y	Female
2.28432	Staff	y	Male
3.83585	Staff	y	Female
6.31104	Staff	y	Female
3.34315	Staff	y	Male
3.84084	Staff	y	Female
1.22783	Staff	y	Female
2.70725	Staff	y	Male
4.61382	Staff	y	Female
9.18413	Staff	y	Female
4.93699	Staff	y	Female
4.98527	Staff	y
5.2331	Staff	y	Female
2.52427	Staff	y	Female
0.463404	Staff	y	Female					Not household but father in law tested positive **/**/***, and partner had been in contact with him.
6.15046	Staff	y
8.55758	PG	y						Dad was in contact with his dad who tested positive. * was not in direct contact with his grandad - **/**/***
6.19858	PG	y	Male					Dad was in contact with his dad who tested positive. * was not in direct contact with his grandad - **/**/***
7.23379	Staff	y	Male
4.96298	Staff	y	Male
9.1356	Staff	y
6.98816	Staff	y	Female
8.00681	Staff	y	Male
8.55808	Staff	y	Female
3.80656	Staff	y	Male
3.86946	Staff	y	Male
6.8108	Staff	y	Female
9.95182	Staff	y	Female
0.873875	PG	y	Female
0.807819	Staff	y	Female
2.25949	Staff	y	Male
5.36409	PG	y	Female					**/**/*** **:** - telephone call to mother to clarify her consent for this and mother is not keen for future research involvemnet. * * (**)
0.723591	Staff	y	Female
1.31643	Staff	y	Female
8.13762	Staff	y	Female
7.79629	Staff	y	Female
5.59809	Staff	y	Female
2.3727	Staff	y	Female
8.7986	Staff	y	Female
3.9412	Staff	y	Female
8.48396	Staff	y	Male
0.210014	Staff	y	Female
2.06405	Staff	y	Female
7.97341	Staff	y	Female
6.90988	Staff	y	Female
4.50855	Staff	y	Female
0.124049	Staff	y	Female
2.76576	PG	y	Female
0.75208	Staff	y	Female
1.39459	Staff	y	Female
6.16408	Staff	y	Female
1.07716	Staff	y	Female
2.07718	Staff	y	Female
7.30965	Staff	y	Female
6.52403	Staff	y	Female
0.652946	Staff	y	Female
7.1939	Staff	y	Female
7.52142	Staff	y	Female
4.02111	Staff	y	Female
4.63542	Staff	y	Female
5.97137	Staff	y	Female
7.59757	Staff	y	Female
0.446573	Staff	y	Female
1.95174	Staff	y	Male
6.04153	Staff	y	Female
2.7788	Staff	y	Female
7.5285	Staff	y	Female
9.68113	Staff	y	Male
9.20335	Staff	y	Male
7.81605	Staff	y	Male
0.502185	Staff	y	Male
7.54989	Staff	y	Male
6.58315	Staff	y	Female
8.60446	Staff	y	Female
8.97729	Staff	y	Female
1.33817	Staff	y	Female
6.64397	Staff	y	Female
1.16371	Staff	y	Male
4.87121	Staff	y	Female
6.07243	Staff	y
4.4448	Staff	y	Female
7.7251	Staff	y	Male
7.25921	Staff	y	Female
3.80069	Staff	y
9.94107	Staff	y	Female					not in questionnaire
5.21873	Staff	y	Female
9.77676	Staff	y	Female
4.71247	Staff	y	Female
5.9823	Staff	y
7.63122	Staff	y						not in questionnaire
3.22015	Staff	y
5.06007	Staff	y	Male
8.34384	Staff	y	Female
8.21667	Staff	y	Male
0.820625	Staff	y
5.23501	PG	y	Female
6.58888	Staff	y	Female
2.17074	PG	y	Female
7.64307	PG	y	Male					Mother * * tested **/**/**** qnd v both tests negative.
1.47088	Staff	y
5.38929	Staff	y	Female
4.29963	Staff	y	Female
7.64338	Staff	y
4.19426	Staff	y	Male
9.66334	Staff	y	Female
7.60835	Staff	y
8.21387	Staff	y	Female
0.15572	Staff	y	Female
8.31182	Staff	y	Female
1.04565	Staff	y
4.69519	Staff	y
0.796594	Staff	y	Female
0.176059	Staff	y	Male
0.130874	Staff	y
5.93551	Staff	y	Female					not in questionnaire
4.1916	Staff	y
2.8959	Staff	y	Female					not in questionnaire
6.94048	Staff	y						not in questionnaire
0.917124	Staff	y	Female					not in questionnaire
8.82523	Staff	y
0.342743	Staff	y	Female
1.5431	Staff	y	Female
9.27758	Staff	y
1.4206	Staff	y
0.162194	Staff	y	Male					not in questionnaire
9.7827	Staff	y
1.74706	Staff	y	Female					not in questionnaire
2.65206	Staff	y						not in questionnaire
0.267632	Staff	y	Female
4.91951	Staff	y	Male
8.11475	Staff	y						not in questionnaire
2.08506	Staff	y	Female
6.83992	Staff	y	Female					not in questionnaire
0.755776	Staff	y						not in questionnaire
4.70431	Staff	y						not in questionnaire
9.1419	Staff	y
2.83128	Staff	y						not in questionnaire
1.67395	Staff	y	Female
9.08818	Staff	y	Female
7.49273	Staff	y						not in questionnaire
4.11001	Staff	y
1.69804	Staff	y
2.54734	Staff	y	Female
4.09573	Staff	y
0.934764	Staff	y	Female					not in questionnaire
9.44778	Staff	y						not in questionnaire
4.29345	Staff	y
9.44956	Staff	y
7.90857	PG	y	Female
5.82179	Staff	y	Female
5.13377	Staff	y	Female					not in questionnaire
2.78955	PG	y	Female
4.50871	Staff	y
0.799473	Staff	y						not in questionnaire
2.77474	Staff	y						not in questionnaire
3.55901	Staff	y	Female					not in questionnaire
0.761116	Staff	y	Male
3.61159	Staff	y	Male
1.3018	Staff	y	Male	Once a week	Once a week	Once a week	Once a week
6.52181	Staff	y	Male					not in questionnaire
0.0623807	PG	y	Male
4.95474	PG	y	Female
7.39332	PG	y	Female
4.23599	PG	y	Male
6.87135	Staff	y	Male
3.25604	Staff	y	Female
5.49422	Staff	y	Female
8.27529	Staff	y	Male
9.97751	Staff	y	Female
7.1685	Staff	y	Male
9.25048	Staff	y	Male
8.88096	PG	y
2.18594	PG	y	Female
5.4045	PG	y	Male
5.58638	Staff	y	Male
6.19779	Staff	y
0.274388	Staff	y
4.05747	Staff	y	Female
9.85003	Staff	y	Male
5.38734	Staff	y	Female
4.58753	Staff	y	Female
4.61226	Staff	y	Male
7.69578	Staff	y	Female
2.72346	Staff	y	Female
8.80306	Staff	y	Male
0.256988	Staff	y	Female
8.66004	Staff	y	Male
1.27744	Staff	y	Female
2.09582	Staff	y	Male
3.81864	Staff	y
7.92181	Staff	y	Female
3.83326	Staff	y	Male
4.97436	Staff	y	Female
9.24498	Staff	y	Male
7.04236	Staff	y	Female
9.64065	Staff	y
0.410596	Staff	y	Male
1.49315	Staff	y	Female
9.83494	PG	y	Male
7.69309	PG	y	Female
2.05741	Staff	y	Male
3.33817	Staff	y	Female
9.13838	Staff	y	Female
2.99506	Staff	y
6.17053	PG	y	Male
6.95354	PG	y	Male
2.72178	Staff	y	Male
6.01939	Staff	y	Male
9.03989	Staff	y	Female
7.03934	PG	y	Male
8.91708	PG	y	Male
3.9577	Staff	y	Female
8.76455	Staff	y	Male
9.07201	Staff	y	Female
3.0773	PG	y	Female
3.27624	PG	y	Male
5.89846	PG	y	Male
7.61522	Staff	y
3.26067	PG	y	Male	Once a week	At the beginning and end of each half-term	Once a week	Once a month
0.0203553	Staff	y	Male
9.94501	Staff	y	Female
1.84382	PG	y	Male	The frequency of swabbing does not bother me	The frequency of swabbing does not bother me	The frequency of swabbing does not bother me	The frequency of swabbing does not bother me
5.44581	Staff	y	Female
8.93064	Staff	y	Female
8.52625	Staff	y
5.27433	Staff	y	Male
3.41385	PG	y	Male	Once a week	Once a week	Twice a week	At the beginning and end of each half-term
5.48813	PG	y	Male
0.0809984	PG	y	Female
0.74045	Staff	y	Female
4.69862	Staff	y	Female
9.54861	Staff	y	Male
9.57291	Staff	y	Male
1.97698	Staff	y	Female
9.16912	Staff	y	Male
4.66919	PG	y	Female
5.88051	Staff	y	Female
2.12807	Staff	y	Female
6.34392	Staff	y	Male
0.113722	Staff	y
5.77987	Staff	y	Male
6.62025	Staff	y	Male
7.27175	Staff	y	Female
6.4277	Staff	y	Female
4.45147	PG	y	Female
1.57204	Staff	y	Female
3.0912	Staff	y	Male
6.55859	Staff	y	Female
5.40132	PG	y	Female	At the beginning and end of each half-term	At the beginning and end of each half-term	At the beginning and end of each half-term	At the beginning and end of each half-term
1.94303	PG	y	Female
4.81978	Staff	y
6.74012	Staff	y
5.83543	Staff	y	Female
8.36336	PG	y	Male
0.513948	Staff	y	Female
5.83119	Staff	y	Female
1.2124	PG	y	Male
2.6772	Staff	y	Female
4.75384	PG	y	Female
7.66242	Staff	y
2.08856	PG	y	Male
7.69827	PG	y	Male
8.16385	PG	y	Male
4.96146	Staff	y		Daily	Daily	Daily	Twice a week
9.51946	Staff	y		Once a month	Once a month	Once a month	Once a month
1.60251	Staff	y		Once a month	Once a month	Once a month	Once a month
6.41157	PG	y	Male	The frequency of swabbing does not bother me	The frequency of swabbing does not bother me	The frequency of swabbing does not bother me	The frequency of swabbing does not bother me
3.70781	Staff	y		At the beginning and end of each half-term	At the beginning and end of each half-term	At the beginning and end of each half-term	At the beginning and end of each half-term
1.2065	PG	y	Male	The frequency of swabbing does not bother me	The frequency of swabbing does not bother me	The frequency of swabbing does not bother me	The frequency of swabbing does not bother me
2.61107	Staff	y	Female	Once a week	Once a month	Once a month	Once a month
8.81243	Staff	y	Female	The frequency of swabbing does not bother me	The frequency of swabbing does not bother me	The frequency of swabbing does not bother me	The frequency of swabbing does not bother me
0.136342	Staff	y	Male	Daily	Daily	Daily	Daily
0.311202	Staff	y	Female	Daily	Daily	Daily	Once a week
8.08233	PG	y	Female	Once a week	Once a week	Once a week	Once a month
1.98969	PG	y	Male	Once a week	Once a month	Once a month	Once a month
8.92129	Staff	y	Female	The frequency of swabbing does not bother me	The frequency of swabbing does not bother me	The frequency of swabbing does not bother me	At the beginning and end of each half-term
8.76885	PG	y		Once a month	Once a month	Once a month	Once a month
6.61584	PG	y	Male	Once a week	Once a week	Once a week	At the beginning and end of each half-term
6.13002	Staff	y	Female	Once a month	Once a month	Once a month	Once a month
0.789324	Staff	y	Female	Twice a week	Twice a week	The frequency of swabbing does not bother me	The frequency of swabbing does not bother me
7.53943	Staff	y	Female	At the beginning and end of each half-term	At the beginning and end of each half-term	At the beginning and end of each half-term	At the beginning and end of each half-term
4.21224	Staff	y	Female	The frequency of swabbing does not bother me	The frequency of swabbing does not bother me	The frequency of swabbing does not bother me	The frequency of swabbing does not bother me
6.22377	Staff	y	Female	The frequency of swabbing does not bother me	The frequency of swabbing does not bother me	The frequency of swabbing does not bother me	The frequency of swabbing does not bother me
3.69198	Staff	y	Female	At the beginning and end of each half-term	Once a month	Once a month	At the beginning and end of each half-term
5.92348	Staff	y	Female	Once a month	Once a month	Once a month	Once a month
8.18434	Staff	y	Female	The frequency of swabbing does not bother me	The frequency of swabbing does not bother me	The frequency of swabbing does not bother me	The frequency of swabbing does not bother me
0.708199	PG	y	Male	Once a month	Once a month	Once a month	Once a month
9.65106	Staff	y	Female	I wouldn't agree to have any more swabs done	I wouldn't agree to have any more swabs done	I wouldn't agree to have any more swabs done	I wouldn't agree to have any more tests done
0.458145	Staff	y	Female	The frequency of swabbing does not bother me	The frequency of swabbing does not bother me	The frequency of swabbing does not bother me	The frequency of swabbing does not bother me
8.48233	Staff	y
9.99051	Staff	y
8.07779	PG	y
3.84181	PG	y	Male
2.61225	Staff	y	Female	The frequency of swabbing does not bother me	The frequency of swabbing does not bother me	The frequency of swabbing does not bother me	The frequency of swabbing does not bother me
9.52149	Staff	y	Female	The frequency of swabbing does not bother me	The frequency of swabbing does not bother me	The frequency of swabbing does not bother me	The frequency of swabbing does not bother me
1.63018	Staff	y
6.28749	Staff	y	Female	The frequency of swabbing does not bother me	The frequency of swabbing does not bother me	The frequency of swabbing does not bother me	The frequency of swabbing does not bother me
2.51047	Staff	y	Female	Daily	Daily	Daily	Daily
4.78417	Staff	y		The frequency of swabbing does not bother me	The frequency of swabbing does not bother me	The frequency of swabbing does not bother me	Once a week
0.851361	Staff	y		At the beginning and end of each half-term	Once a month	At the beginning and end of each half-term	Once a month
9.52743	PG	y	Male
6.12768	Staff	y
5.2584	PG	y	Male
4.42043	PG	y	Female
5.16923	PG	y	Male
9.28289	Staff	y
8.92845	Staff	y	Female
9.43119	Staff	y	Female
5.013	Staff	y	Female
4.2042	Staff	y	Female
6.57997	Staff	y	Female
2.38657	Staff	y
5.45151	Staff	y
4.53884	Staff	y	Female
1.21952	Staff	y	Female
7.43574	Staff	y	Female
6.56286	Staff	y	Female
9.25236	PG	y	Female	Daily	Daily	Daily	Once a month
5.85937	Staff	y	Female
9.26307	PG	y	Male	Daily	Daily	Daily	Once a month
7.7622	PG	y	Female	I wouldn't agree to have any more swabs done	I wouldn't agree to have any more swabs done	At the beginning and end of each half-term	I wouldn't agree to have any more tests done
6.79972	PG	y	Female	I wouldn't agree to have any more swabs done	I wouldn't agree to have any more swabs done	At the beginning and end of each term	I wouldn't agree to have any more tests done
0.845288	PG	y	Female	Daily	Daily	Daily	Once a week
7.73066	PG	y	Female	Daily	Daily	Daily	Daily
6.99378	PG	y	Female	Daily	Daily	Daily	Once a month
5.5115	PG	y	Female	Once a month	Once a month	Once a month	Once a month
0.430555	PG	y	Female
9.99133	PG	y	Female	The frequency of swabbing does not bother me	The frequency of swabbing does not bother me	The frequency of swabbing does not bother me	The frequency of swabbing does not bother me
7.71932	PG	y	Male	At the beginning and end of each term	At the beginning and end of each term	At the beginning and end of each term	At the beginning and end of each term
9.17879	PG	y	Male	Once a month	Once a month	Once a month	Once a month
8.51724	PG	y	Male	Once a month	Once a month	Once a month	Once a month
9.55603	PG	y	Female	The frequency of swabbing does not bother me	The frequency of swabbing does not bother me	The frequency of swabbing does not bother me	Once a month
9.11988	PG	y	Male	The frequency of swabbing does not bother me	The frequency of swabbing does not bother me	The frequency of swabbing does not bother me	Once a month
4.80734	Staff	y	Female
8.39625	Staff	y	Female
7.67473	Staff	y	Female
2.87952	Staff	y
0.193584	Staff	y	Female
3.78196	Staff	y	Female
3.74861	PG	y	Female	Daily	Daily	Daily	Daily
1.75212	PG	y	Male	Once a week	Once a week	Once a week	Once a week
8.71887	PG	y	Female	Once a week	Once a week	Once a week	Once a week
2.45882	PG	y	Female	Once a month	Once a month	Once a month	Once a month
9.46438	PG	y	Male	Once a month	Once a month	Once a month	Once a month
7.77114	PG	y	Male	Once a month	Once a month	Once a month	Once a month
1.0464	PG	y	Female	Once a month	Once a month	Once a month	Once a month
2.61644	PG	y	Male	Once a week	Once a week	Once a week	Once a month
2.21694	PG	y	Female	Once a week	Once a week	Once a week	Once a month
0.239709	PG	y	Female	Once a week	Once a week	Once a week	Once a month
8.95295	PG	y	Female	Once a week	Once a week	Daily	Once a month
5.89796	PG	y	Female	Twice a week	Once a week	Daily	Once a month
0.0196621	PG	y	Male
3.23691	PG	y	Male
2.19113	PG	y	Male	Once a month	Once a month	Once a month	Once a month
0.704066	PG	y	Male	Once a week	Once a week	Once a week	Once a week
6.59694	PG	y	Male	Daily	Daily	Daily	At the beginning and end of each half-term
0.0793313	PG	y	Male	Once a month	Once a month	Once a month	Once a month
7.14005	PG	y	Male	Daily	Daily	Daily	Daily
6.27752	PG	y	Female	Daily	Daily	Daily	Daily
2.19442	Staff	y	Female
5.73373	Staff	y	Female
0.721085	Staff	y	Female
0.91395	Staff	y	Female
3.53243	Staff	y	Female
0.150289	Staff	y	Female
1.60174	Staff	y	Male
1.09994	PG	y	Male	The frequency of swabbing does not bother me	The frequency of swabbing does not bother me	The frequency of swabbing does not bother me	The frequency of swabbing does not bother me
5.96078	Staff	y
7.27284	Staff	y
6.18889	PG	y	Male	Once a month	Once a month	Once a month	At the beginning and end of each term
4.38736	PG	y		At the beginning and end of each half-term	I wouldn't agree to have any more swabs done	At the beginning and end of each term	I wouldn't agree to have any more tests done
2.39485	PG	y
6.15172	Staff	y
4.02962	Staff	y	Male
0.0571816	Staff	y
0.0586813	Staff	y	Female
2.64044	Staff	y
0.412511	Staff	y	Female
5.45259	Staff	y	Female
6.63211	Staff	y	Female
7.11072	Staff	y	Female
8.15529	PG	y	Female	Once a month	Once a month	Once a month	Once a month
9.43433	PG	y	Female	Once a month	Once a month	Once a month	Once a month
8.90712	PG	y	Male	Once a week	At the beginning and end of each half-term	At the beginning and end of each half-term	At the beginning and end of each term
1.27609	PG	y	Female	The frequency of swabbing does not bother me	The frequency of swabbing does not bother me	The frequency of swabbing does not bother me	The frequency of swabbing does not bother me
8.89739	Staff	y	Female
1.55223	Staff	y	Female
3.39676	PG	y	Male	The frequency of swabbing does not bother me	The frequency of swabbing does not bother me	The frequency of swabbing does not bother me	At the beginning and end of each term
2.32626	Staff	y	Female
2.94956	PG	y	Male	At the beginning and end of each term	At the beginning and end of each term	At the beginning and end of each term	I wouldn't agree to have any more tests done
2.70661	PG	y	Female	At the beginning and end of each term	At the beginning and end of each term	At the beginning and end of each term	I wouldn't agree to have any more tests done
6.49633	PG	y	Male	Once a week	Once a week	Once a month	Once a month
9.8667	PG	y	Female	Once a week	Once a week	Once a week	Once a week
0.483581	PG	y	Female	Once a week	Once a week	Once a week	Once a week
6.66023	Staff	y	Female
8.15896	PG	y	Female	Once a month	At the beginning and end of each term	Once a month	I wouldn't agree to have any more tests done
3.59816	PG	y	Female	Once a month	At the beginning and end of each term	Once a month	I wouldn't agree to have any more tests done
4.58213	PG	y	Male	Once a month	At the beginning and end of each term	At the beginning and end of each term	I wouldn't agree to have any more tests done
7.55808	Staff	y	Female
8.49848	Staff	y	Female
0.54413	Staff	y	Female
9.10071	Staff	y	Female
3.65297	Staff	y		Daily	Daily	Daily	Daily	Had symptoms in **
[truncated: 9,662 more rows]
